# Supplementary material for: 177 Saponins, Including 11 New Compounds in Wild Ginseng Tentatively Identified via HPLC-IT-TOF-MSn, and Differences among Wild Ginseng, Ginseng under Forest, and Cultivated Ginseng
Source: MDPI journal article supplement (doi:10.3390/molecules26113371), 2021-06-02
Supplement: s1 [file s1]

# 177 Saponins, Including 11 New Compounds in Wild Ginseng Tentatively Identified via HPLC-IT-TOF-MS<sup>n</sup>, and Differences among Wild Ginseng, Ginseng under Forest, and Cultivated Ginseng

Chao-Qun Wang, Li-Wei Yi, Lin Zhao, Yu-Zhen Zhou, Fang Guo, Yu-Shu Huo, Da-Qing Zhao, Feng Xu \*, Xuan Wang \* and Shao-Qing Cai \*

## Contents

|                                                                                                                                                                                                                                                                                                     |                              |
|-----------------------------------------------------------------------------------------------------------------------------------------------------------------------------------------------------------------------------------------------------------------------------------------------------|------------------------------|
| <b>Figure S1.</b>                                                                                                                                                                                                                                                                                   | MS <sup>n</sup> ESI(-) frag- |
| mentation of ginsenoside Rg <sub>1</sub> (retention time in F-GS sample No. 18: 28.105 min).                                                                                                                                                                                                        |                              |
| <b>Figure S2.</b>                                                                                                                                                                                                                                                                                   | MS <sup>n</sup> ESI(-) frag- |
| mentation of ginsenoside Re (retention time in W-GS sample No. 20: 35.347 min).                                                                                                                                                                                                                     |                              |
| <b>Figure S3.</b>                                                                                                                                                                                                                                                                                   | MS <sup>n</sup> ESI(-) frag- |
| mentation of ginsenoside Rf (retention time in W-GS sample No. 46.813 min).                                                                                                                                                                                                                         |                              |
| <b>Figure S4.</b>                                                                                                                                                                                                                                                                                   | MS <sup>n</sup> ESI(-) frag- |
| mentation of ginsenoside Rb <sub>1</sub> (retention time in W-GS sample No. 19: 48.265 min).                                                                                                                                                                                                        |                              |
| <b>Figure S5.</b>                                                                                                                                                                                                                                                                                   | MS <sup>n</sup> ESI(-) frag- |
| mentation of ginsenoside Rd (retention time in W-GS sample No. 19: 54.120 min).                                                                                                                                                                                                                     |                              |
| <b>Figure S6.</b>                                                                                                                                                                                                                                                                                   | MS <sup>n</sup> ESI(-) frag- |
| mentation of the potential new compound (C <sub>52</sub> H <sub>88</sub> O <sub>23</sub> ), and the locations and orders of sugar residues and substituent group (-C <sub>4</sub> H <sub>6</sub> O <sub>4</sub> ) might be different (retention time in W-GS sample No. 19: 3.938 min).             |                              |
| <b>Figure S7.</b>                                                                                                                                                                                                                                                                                   | MS <sup>n</sup> ESI(-) frag- |
| mentation of the potential new compound (C <sub>51</sub> H <sub>80</sub> O <sub>21</sub> ) with unknown aglycone predicted as C <sub>33</sub> H <sub>50</sub> O <sub>7</sub> , and the locations and orders of sugar residues might be different (retention time in C-GS sample No. 25: 4.147 min). |                              |
| <b>Figure S8.</b>                                                                                                                                                                                                                                                                                   | MS <sup>n</sup> ESI(-) frag- |
| mentation of the potential new compound (C <sub>48</sub> H <sub>80</sub> O <sub>20</sub> ) with possible aglycone of C1-b (shown in the figure), C3-b and B10, and the locations and orders of sugar residues might be different (retention time in W-GS sample No. 20: 6.350 min).                 |                              |
| <b>Figure S9.</b>                                                                                                                                                                                                                                                                                   | MS <sup>n</sup> ESI(-) frag- |
| mentation of the potential new compound (C <sub>45</sub> H <sub>68</sub> O <sub>16</sub> ) with unknown aglycone predicted as C <sub>33</sub> H <sub>48</sub> O <sub>7</sub> , and the locations and orders of sugar residues might be different (retention time in C-GS sample No. 25: 6.970 min). |                              |
| <b>Figure S10.</b>                                                                                                                                                                                                                                                                                  | MS <sup>n</sup> ESI(-) frag- |
| mentation of the potential new compound (C <sub>45</sub> H <sub>70</sub> O <sub>17</sub> ) with unknown aglycone predicted as C <sub>30</sub> H <sub>44</sub> O <sub>7</sub> (retention time in C-GS sample No. 25: 9.168 min).                                                                     |                              |
| <b>Figure S11.</b>                                                                                                                                                                                                                                                                                  | MS <sup>n</sup> ESI(-) frag- |
| mentation of the potential new compound (C <sub>54</sub> H <sub>84</sub> O <sub>26</sub> ) with unknown aglycone predicted as C <sub>30</sub> H <sub>44</sub> O <sub>6</sub> (retention time in C-GS sample No. 25: 11.687 min).                                                                    |                              |
| <b>Figure S12.</b>                                                                                                                                                                                                                                                                                  | MS <sup>n</sup> ESI(-) frag- |
| mentation of the potential new compound (C <sub>48</sub> H <sub>80</sub> O <sub>18</sub> ) with aglycone predicted as PPD (retention time in W-GS sample No. 19: 19.317 min).                                                                                                                       |                              |
| <b>Figure S13.</b>                                                                                                                                                                                                                                                                                  | MS <sup>n</sup> ESI(-) frag- |
| mentation of the potential new compound (C <sub>36</sub> H <sub>64</sub> O <sub>10</sub> ) with predicted aglycone of B1-b,                                                                                                                                                                         |                              |

and the location of sugar residue might be different (retention time in W-GS sample No. 20: 20.045 min).

**Figure S14.** MS<sup>n</sup> ESI(-) fragmentation of the potential new compound (C<sub>43</sub>H<sub>72</sub>O<sub>16</sub>) with unknown aglycone predicted as C<sub>31</sub>H<sub>52</sub>O<sub>7</sub> (retention time in W-GS sample No. 20: 20.270 min).

**Figure S15.** MS<sup>n</sup> ESI(-) fragmentation of the potential new compound (C<sub>38</sub>H<sub>66</sub>O<sub>13</sub>) with unknown aglycone predicted as C<sub>26</sub>H<sub>46</sub>O<sub>4</sub> (retention time in W-GS sample No. 19: 26.555 min).

**Figure S16.** MS<sup>n</sup> ESI(-) fragmentation of the potential new compound (C<sub>41</sub>H<sub>68</sub>O<sub>13</sub>) with predicted aglycone of B8-b, and the locations of sugar residues might be different (retention time in W-GS sample No. 20: 40.932 min).

**Figure S17.** MS<sup>n</sup> ESI(-) fragmentation of the potential new compound (C<sub>54</sub>H<sub>92</sub>O<sub>24</sub>) with predicted aglycone of B4-a, and the locations and orders of sugar residues might be different (retention time in W-GS sample No. 20: 41.082 min).

**Figure S18.** MS<sup>n</sup> ESI(-) fragmentation of the potential new compound (C<sub>39</sub>H<sub>68</sub>O<sub>14</sub>) with unknown aglycone predicted as C<sub>27</sub>H<sub>48</sub>O<sub>4</sub> (retention time in W-GS sample No. 20: 44.095 min).

**Figure S19.** MS<sup>n</sup> ESI(-) fragmentation of the potential new compound (C<sub>38</sub>H<sub>64</sub>O<sub>14</sub>) with unknown aglycone predicted as C<sub>26</sub>H<sub>44</sub>O<sub>5</sub> (retention time in W-GS sample No. 19: 45.002 min). **Table S1.** Detailed LC-MS information of 199 compounds tentatively identified from wild ginseng (No. 19 and No. 20), ginseng under forest (No. 18) and cultivated ginseng (No. 25)

**Table S1.** Detailed LC-MS information of 199 saponins tentatively identified from wild ginseng (nos. 19 and 20), ginseng under forest (no. 18) and cultivated ginseng (no. 25)

**Table S2.** Saponins detected from “all the four ginseng samples” and “both the two wild ginseng samples” by HPLC-IT-TOF-MS<sup>n</sup>

**Figure S20.** Potential saponin precursors (red spots) extracted by “5-point screening” method with the 5 points (x, y) of estimated lowest *m/z* (441, 0.3783), estimated highest mass defection (503, 0.3378), estimated lowest *m/z* with the lowest mass defection (591, 0.4630), estimated highest *m/z* with the highest mass defection (1421, 0.5505), and estimated highest *m/z* with the lowest mass defection (1467, 0.8150), in which x represented the integral part of *m/z*, and y represents the decimal part of *m/z*.

**Figure S21.** Overlapped chromatograms of reference substances of ginsenosides Rg<sub>1</sub>, Re, Rf, Rb<sub>1</sub>, Rg<sub>2</sub>, Rh<sub>1</sub>, and Rd.

**Figure S22.** Comparison of the contents of seven ginsenosides and their total content between ginseng under forest with ages older than 6 years (n = 26), and ginseng under forest, cultivated ginseng with age of 6 years (n = 10; \* *p* < 0.05; ns, no significance).

**Figure S23.** Comparison of the contents of seven ginsenosides and their total content between ginseng under forest with ages older than 10 years (n = 20), and ginseng under forest, cultivated ginseng with age younger than 10 years (n = 16; ns, no significance).

**Figure S24.** Comparison of the contents of seven ginsenosides and their total content between ginseng under forest with ages older than 15 years (n = 10), and ginseng under forest, cultivated ginseng with age younger than 15 years (n = 26; \*\* *p* < 0.01; ns, no significance).

**Figure S25.** Comparison of the contents of seven ginsenosides and their total content between ginseng under forest with ages older than 15 years (n = 7), between 10 to 15 years (n = 13) and ginseng under forest, cultivated ginseng with age younger than 10 years (n = 14; \* *p* < 0.01; ns, no significance).

---

**Figure S26.** Chromatographic fingerprints obtained by HPLC-DAD of 40 ginseng samples with retention time correction by 10 common peaks using Similarity Evaluation System for Chromatographic Fingerprint of TCM version 2012 (S1–S40: ginseng samples No. 1–40; R: reference fingerprint automatically generated by software)

**Table S3.** Peak areas (manually integrated) of the five peaks within the characteristic peak pattern and the ratio of signal-to-noise

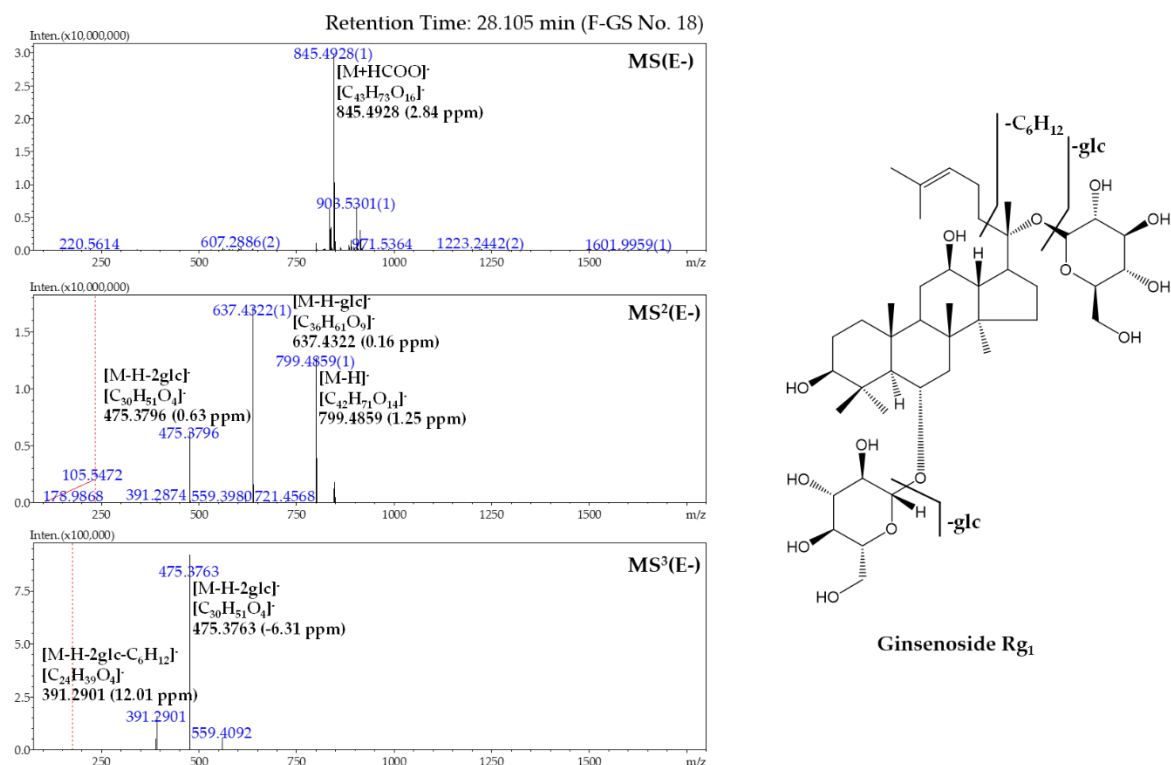

Figure S1. MS<sup>n</sup> ESI(-) fragmentation of ginsenoside Rg<sub>1</sub> (retention time in F-GS sample No. 18: 28.105 min).

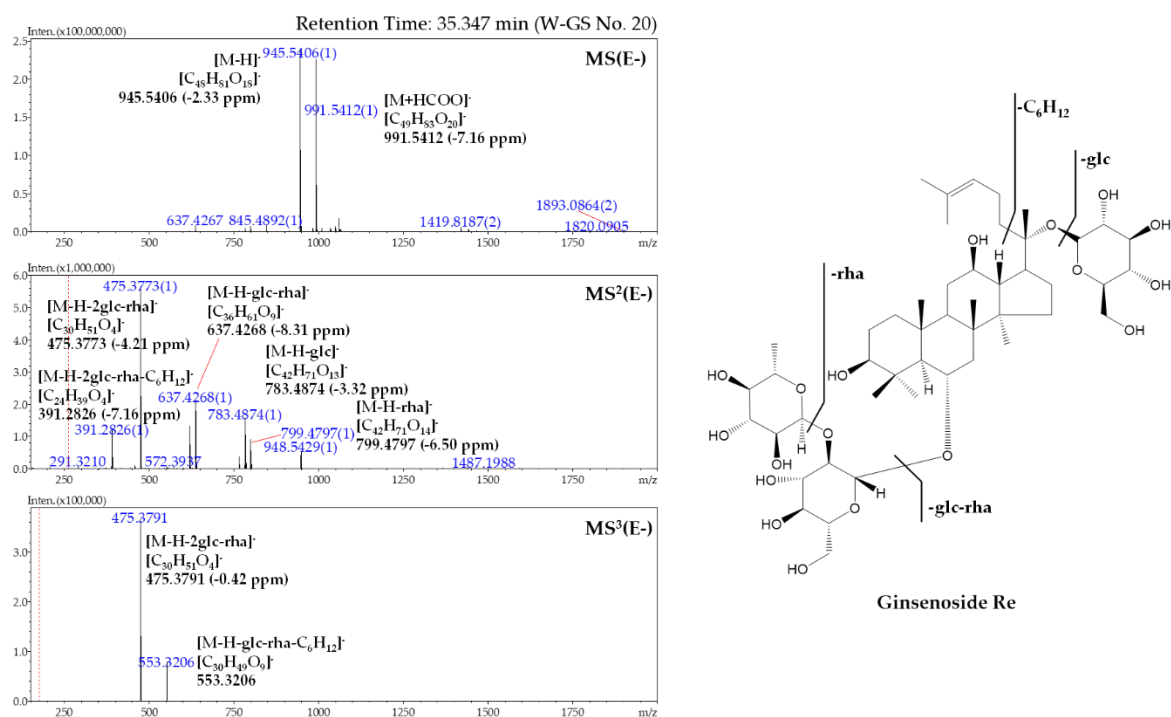

Figure S2. MS<sup>n</sup> ESI(-) fragmentation of ginsenoside Re (retention time in W-GS sample No. 20: 35.347 min).

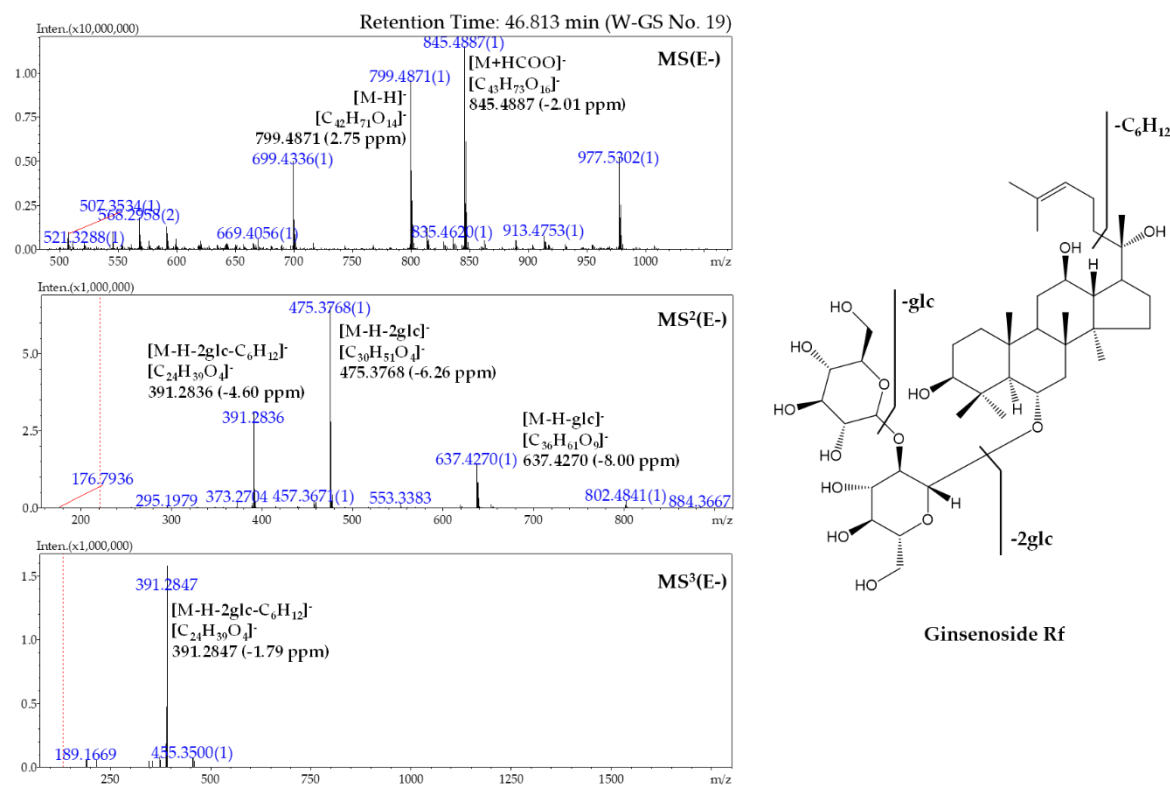

**Figure S3.** MS<sup>n</sup> ESI(-) fragmentation of ginsenoside Rf (retention time in W-GS sample No. 46.813 min).

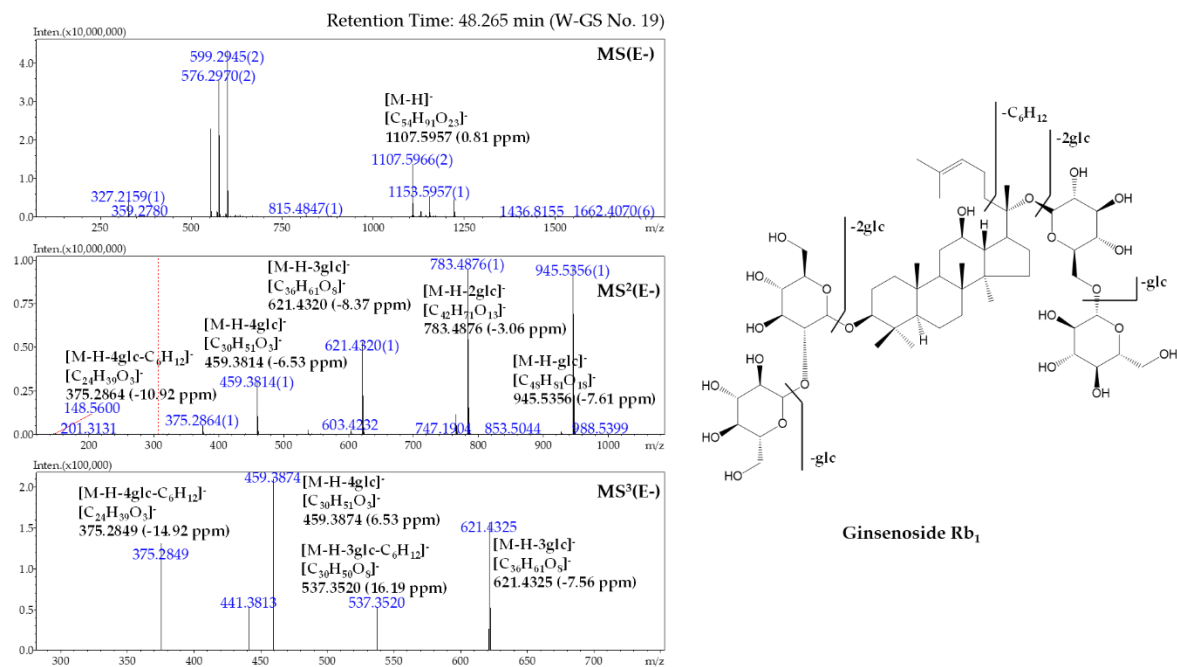

**Figure S4.** MS<sup>n</sup> ESI(-) fragmentation of ginsenoside Rb<sub>1</sub> (retention time in W-GS sample No. 19: 48.265 min).

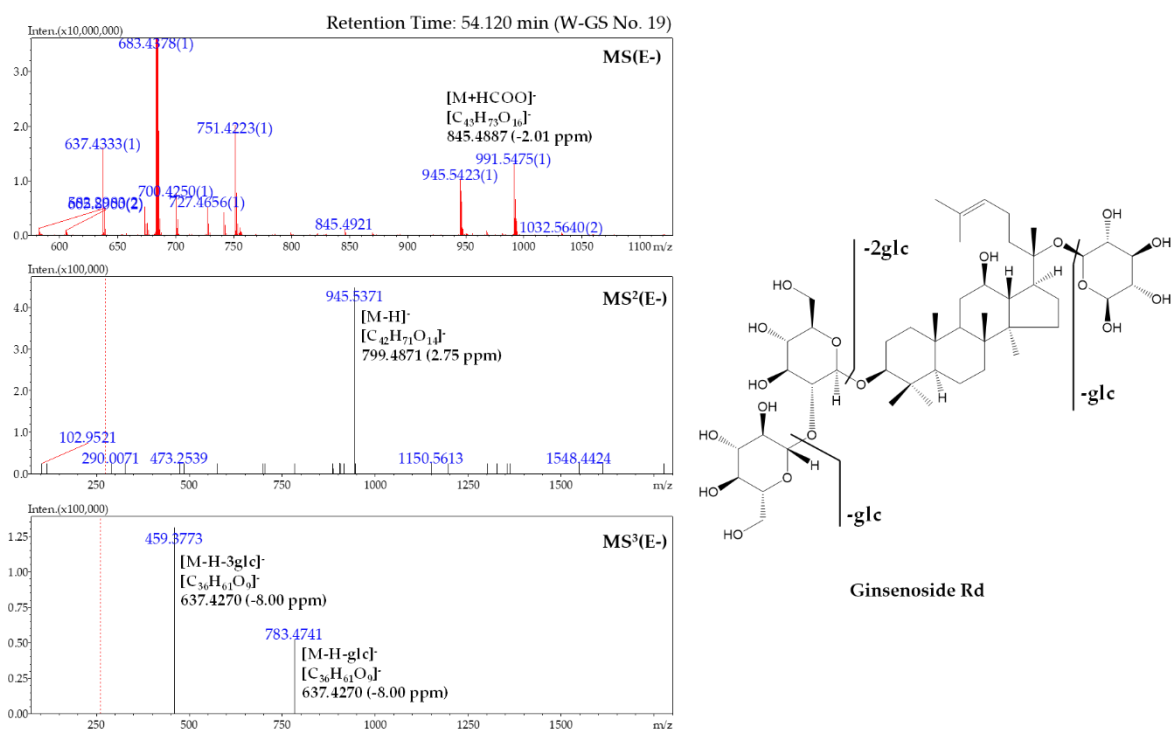

**Figure S5.** MS<sup>n</sup> ESI(-) fragmentation of ginsenoside Rd (retention time in W-GS sample No. 19: 54.120 min).

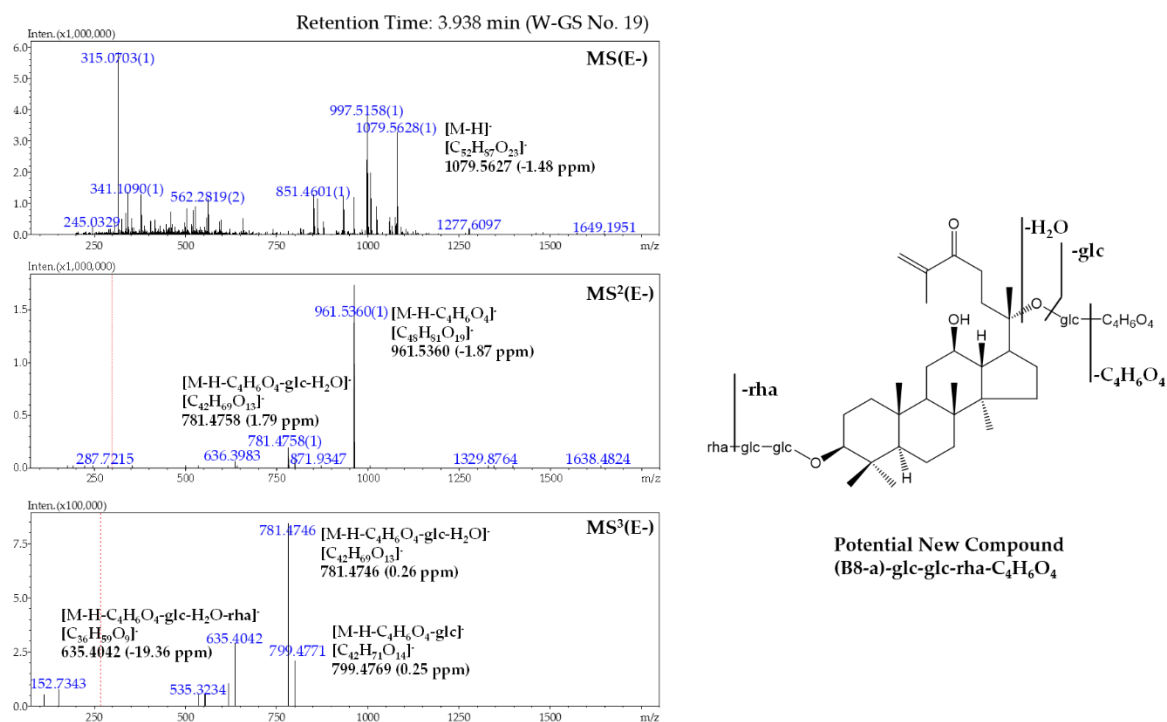

**Figure S6.** MS<sup>n</sup> ESI(-) fragmentation of the potential new compound ( $C_{52}H_{88}O_{23}$ ), and the locations and orders of sugar residues and substituent group ( $-C_4H_6O_4$ ) might be different (retention time in W-GS sample No. 19: 3.938 min).

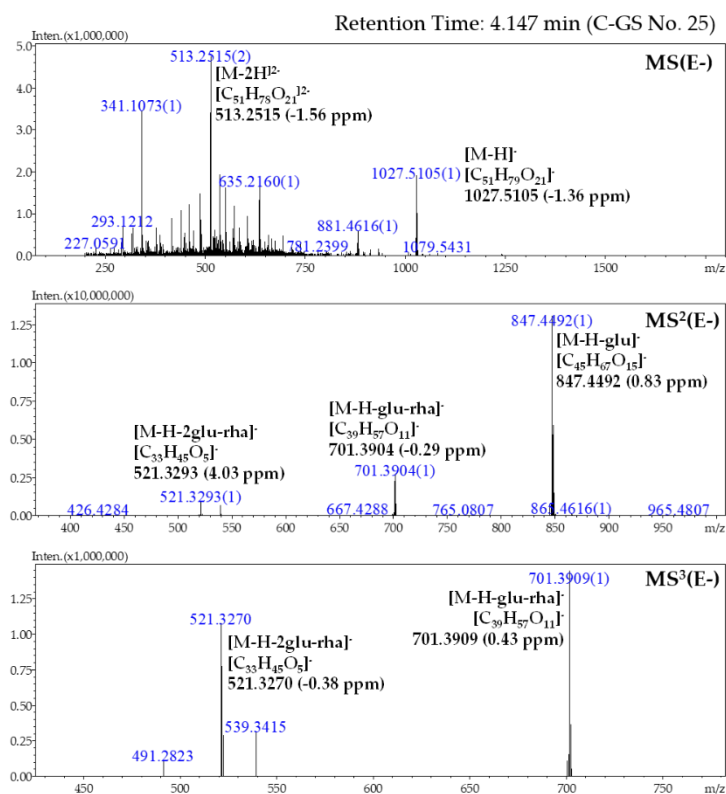

**Figure S7.** MS<sup>n</sup> ESI(-) fragmentation of the potential new compound (C<sub>51</sub>H<sub>80</sub>O<sub>21</sub>) with unknown aglycone predicted as C<sub>33</sub>H<sub>50</sub>O<sub>7</sub>, and the locations and orders of sugar residues might be different (retention time in C-GS sample No. 25: 4.147 min).

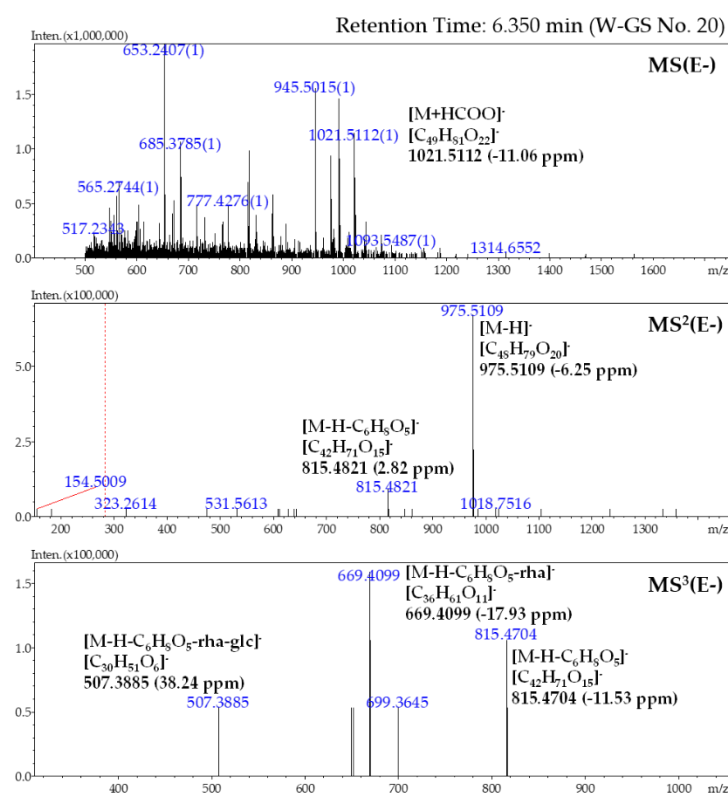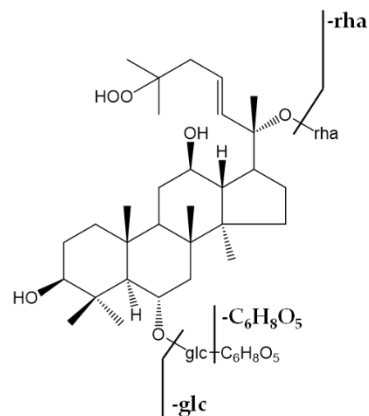

**Figure S8.** MS<sup>n</sup> ESI(-) fragmentation of the potential new compound (C<sub>48</sub>H<sub>80</sub>O<sub>20</sub>) with possible aglycone of C1-b (shown in the figure), C3-b and B10, and the locations and orders of sugar residues might be different (retention time in W-GS sample No. 20: 6.350 min).

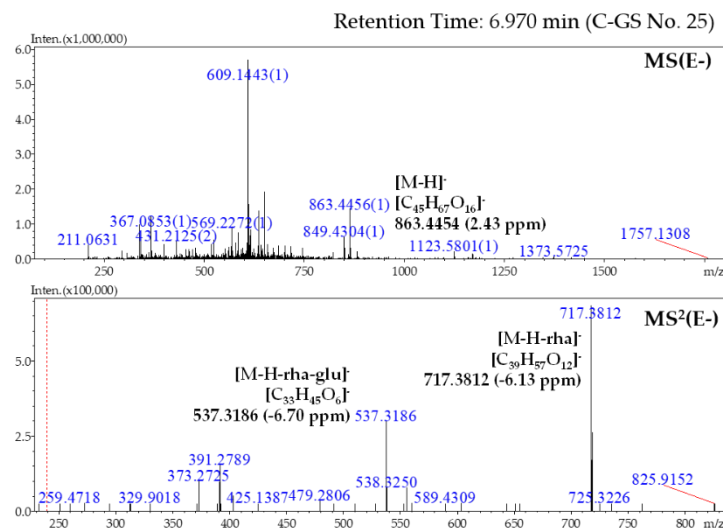

**Figure S9.** MS<sup>n</sup> ESI(-) fragmentation of the potential new compound (C<sub>45</sub>H<sub>68</sub>O<sub>16</sub>) with unknown aglycone predicted as C<sub>33</sub>H<sub>48</sub>O<sub>7</sub>, and the locations and orders of sugar residues might be different (retention time in C-GS sample No. 25: 6.970 min).



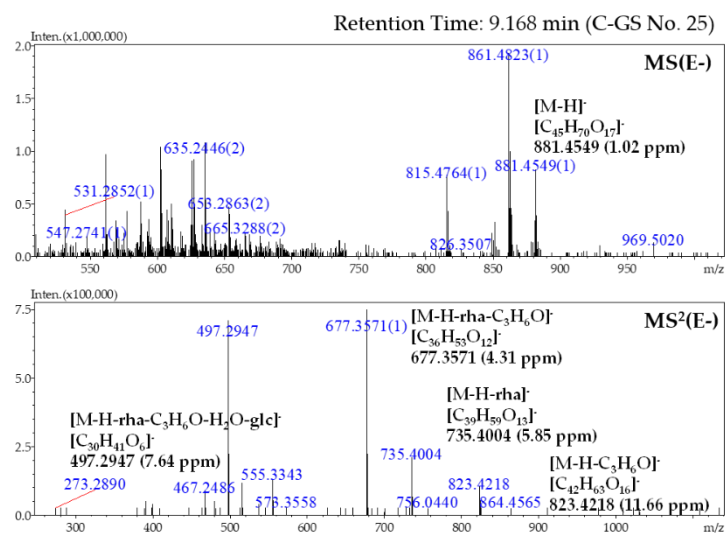

**Figure S10.** MS<sup>n</sup> ESI(-) fragmentation of the potential new compound ( $C_{45}H_{70}O_{17}$ ) with unknown aglycone predicted as  $C_{30}H_{44}O_7$  (retention time in C-GS sample No. 25: 9.168 min).

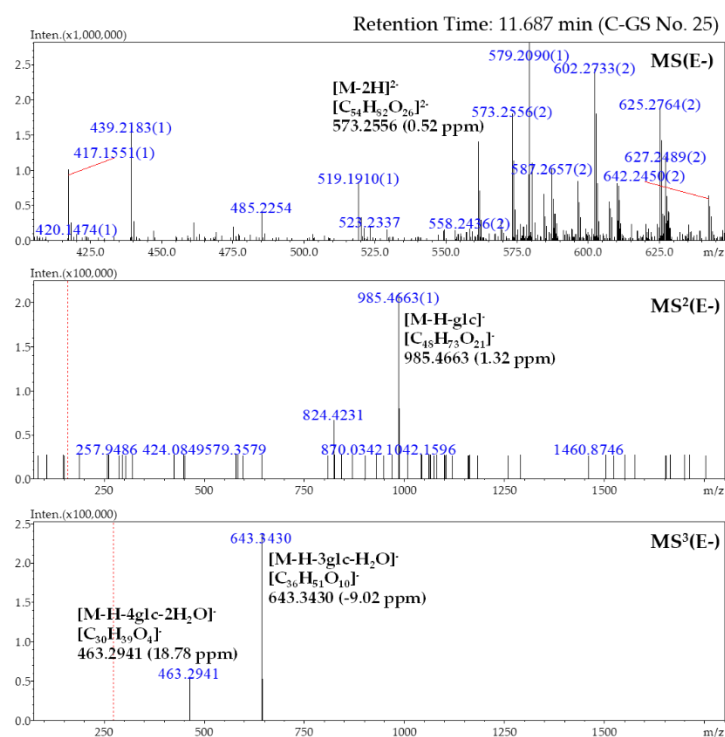

**Figure S11.** MS<sup>n</sup> ESI(-) fragmentation of the potential new compound ( $C_{54}H_{84}O_{26}$ ) with unknown aglycone predicted as  $C_{30}H_{44}O_6$  (retention time in C-GS sample No. 25: 11.687 min).

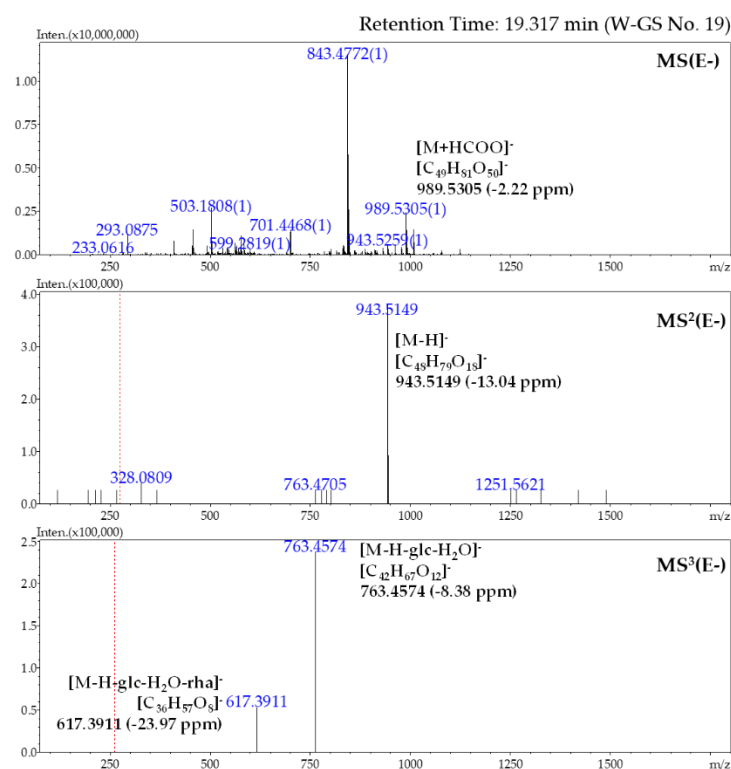

**Figure S12.** MS<sup>n</sup> ESI(-) fragmentation of the potential new compound (C<sub>48</sub>H<sub>80</sub>O<sub>18</sub>) with aglycone predicted as PPD (retention time in W-GS sample No. 19: 19.317 min).

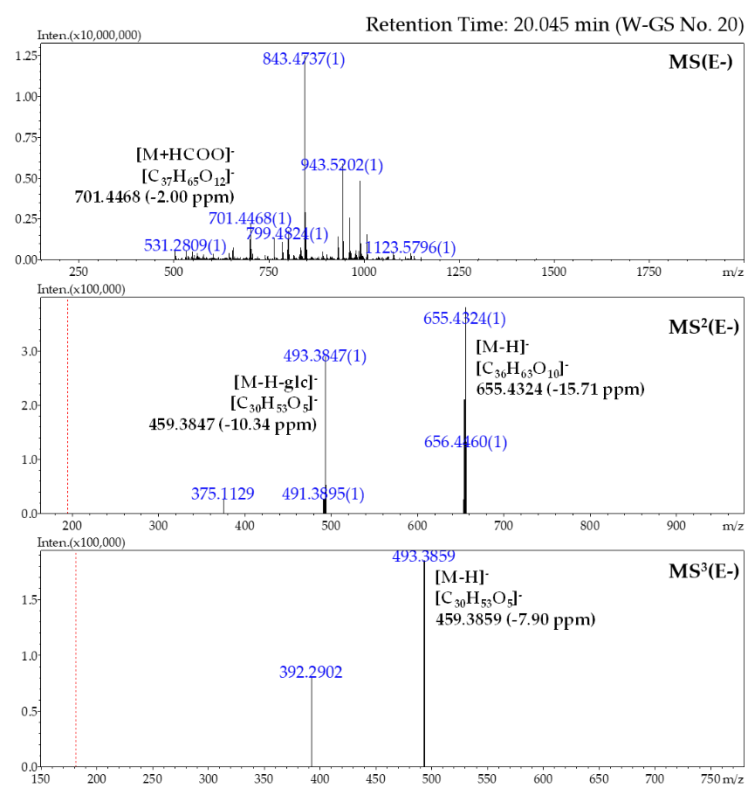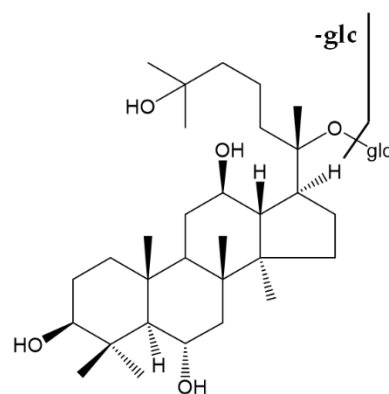

**Potential New Compound  
(B1-b)-glc**

**Figure S13.** MS<sup>n</sup> ESI(-) fragmentation of the potential new compound (C<sub>36</sub>H<sub>64</sub>O<sub>10</sub>) with predicted aglycone of B1-b, and the location of sugar residue might be different (retention time in W-GS sample No. 20: 20.045 min).

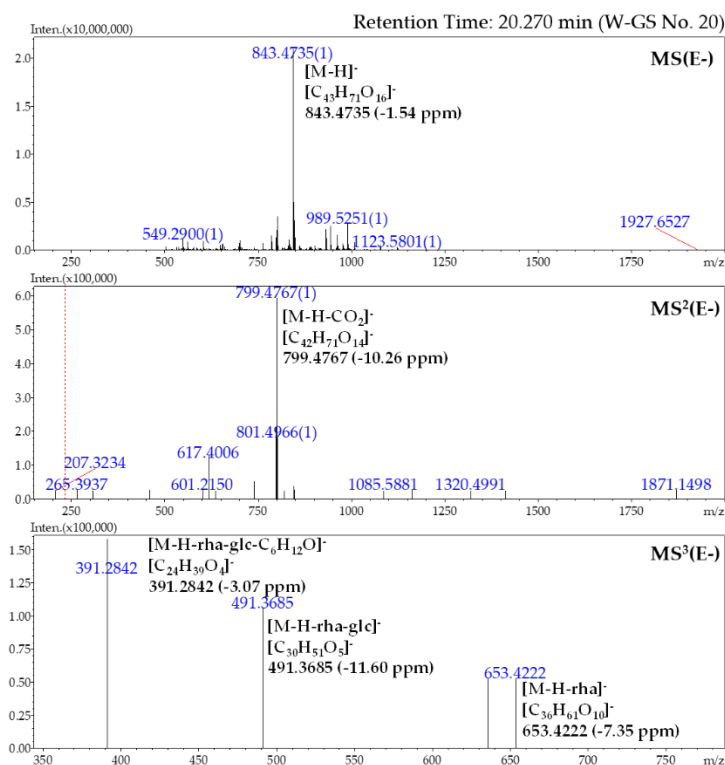

**Figure S14.** MS<sup>n</sup> ESI(-) fragmentation of the potential new compound (C<sub>43</sub>H<sub>72</sub>O<sub>16</sub>) with unknown aglycone predicted as C<sub>31</sub>H<sub>52</sub>O<sub>7</sub> (retention time in W-GS sample No. 20: 20.270 min).

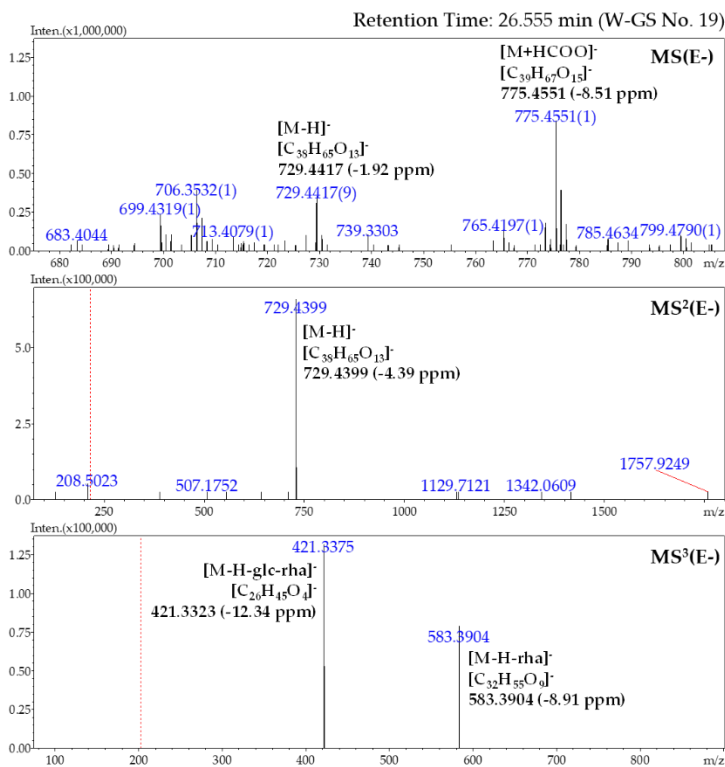

**Figure S15.** MS<sup>n</sup> ESI(-) fragmentation of the potential new compound (C<sub>38</sub>H<sub>66</sub>O<sub>13</sub>) with unknown aglycone predicted as C<sub>26</sub>H<sub>46</sub>O<sub>4</sub> (retention time in W-GS sample No. 19: 26.555 min).



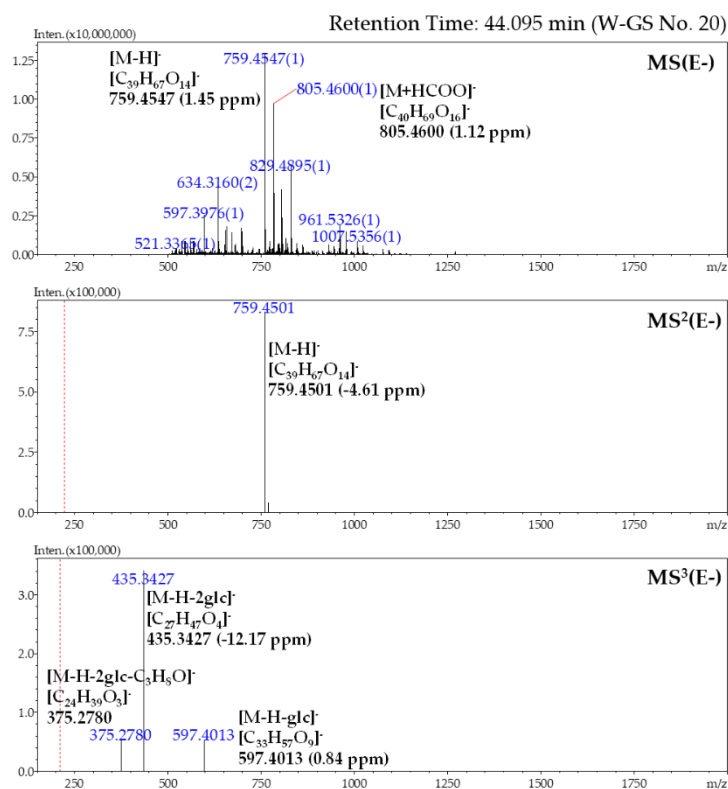

**Figure S18.** MS<sup>n</sup> ESI(-) fragmentation of the potential new compound ( $C_{39}H_{68}O_{14}$ ) with unknown aglycone predicted as  $C_{27}H_{48}O_4$  (retention time in W-GS sample No. 20: 44.095 min).

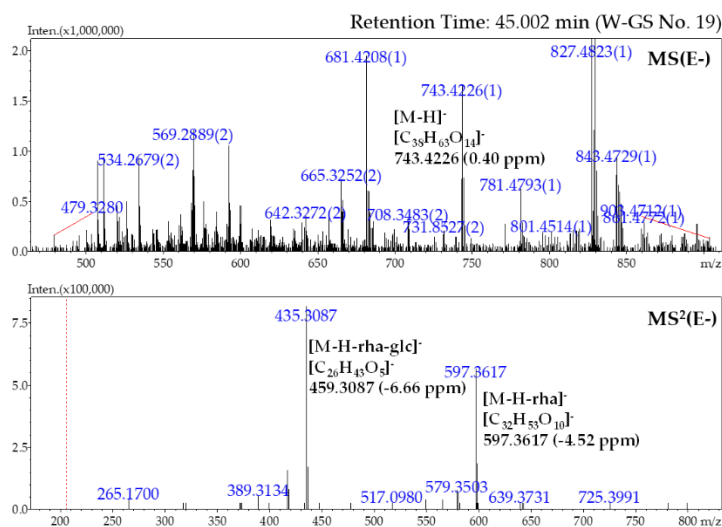

**Figure S19.** MS<sup>n</sup> ESI(-) fragmentation of the potential new compound ( $C_{38}H_{64}O_{14}$ ) with unknown aglycone predicted as  $C_{26}H_{44}O_5$  (retention time in W-GS sample No. 19: 45.002 min).

Table S1 Detailed LC-MS information of 199 saponins tentatively identified from wild ginseng (nos. 19 and 20), ginseng under forest (no. 18) and cultivated ginseng (no. 25)

| no.              | Retention Time     | Molecular Formula                               | Measured (m/z) | Predicted (m/z) | Diff (ppm) | Ion                   | ESI-MS <sup>n</sup> Data                                                                                                                                                                            | Identification                                                                                                       | Sample           | Ref                |
|------------------|--------------------|-------------------------------------------------|----------------|-----------------|------------|-----------------------|-----------------------------------------------------------------------------------------------------------------------------------------------------------------------------------------------------|----------------------------------------------------------------------------------------------------------------------|------------------|--------------------|
| 1                | 3.828 <sup>d</sup> | C <sub>51</sub> H <sub>78</sub> O <sub>21</sub> | 1025.4949      | 1025.4693       | -1.37      | [M-H] <sup>-</sup>    | MS <sup>2</sup> [1025.4944]: 845.4316(100), 699.3736(10.89), 537.3200(3.27)<br>MS <sup>3</sup> [1025.4944→845.4311]: 699.3765(100), 521.3255(30.33)                                                 | unknown-glc-glc-rha <sup>e</sup>                                                                                     | no. 25           | [1]                |
| 2 <sup>**</sup>  | 3.938 <sup>b</sup> | C <sub>52</sub> H <sub>88</sub> O <sub>23</sub> | 1079.5628      | 1079.5644       | -1.48      | [M-H] <sup>-</sup>    | MS <sup>2</sup> [1079.5627]: 962.5320(100), 961.5308(76.47), 781.4758(11.26)<br>MS <sup>3</sup> [1079.5627→961.5361]: 799.4771(4.42), 781.4756(100), 635.4042(23.49), 617.4012(5.15)                | (B8-a)-glc-glc-rha-C <sub>4</sub> H <sub>6</sub> O <sub>4</sub><br>(Structure not found in SciFinder)                | no. 19           | New                |
| 3 <sup>**</sup>  | 4.147 <sup>d</sup> | C <sub>51</sub> H <sub>80</sub> O <sub>21</sub> | 1027.5105      | 1027.5119       | -1.36      | [M-H] <sup>-</sup>    | MS <sup>2</sup> [1027.5104]: 847.4492(100)<br>MS <sup>3</sup> [1027.5104→847.4492]: 701.3909(100), 521.3270(57.60), 491.2823(5.26)                                                                  | Unknown(C <sub>33</sub> H <sub>50</sub> O <sub>7</sub> )-glc-glc-rha<br>(Formula not found in SciFinder)             | no. 25           | New                |
| 4 <sup>*</sup>   | 4.202 <sup>b</sup> | C <sub>48</sub> H <sub>82</sub> O <sub>19</sub> | 1007.5439      | 1007.5432       | 0.69       | [M+HCOO] <sup>-</sup> | MS <sup>2</sup> [1007.5436]: 961.5367(100)<br>MS <sup>3</sup> [1007.5436→961.5366]: 781.4740(100), 492.3685(100)                                                                                    | (B4-b)/B6-6-glc(-glc)-rha<br>(First found in ginseng)                                                                | no. 19           | [1] <sup>o</sup>   |
| 5 <sup>*</sup>   | 5.342 <sup>a</sup> | C <sub>48</sub> H <sub>82</sub> O <sub>20</sub> | 977.5274       | 977.5327        | -5.42      | [M-H] <sup>-</sup>    | MS <sup>2</sup> [977.5274]: 815.4743(10.94), 797.4658(100), 779.4522(31.93)<br>MS <sup>3</sup> [977.5274→797.4655]: 489.3343(100)                                                                   | (C3-b)-6-glc-20-glc-rha<br>(First found in ginseng)                                                                  | no. 20<br>no. 19 | [1] <sup>o</sup>   |
| 6 <sup>*</sup>   | 5.953 <sup>a</sup> | C <sub>36</sub> H <sub>64</sub> O <sub>11</sub> | 717.4382       | 717.4431        | -6.83      | [M+HCOO] <sup>-</sup> | MS <sup>2</sup> [717.4382]: 671.4384(100)<br>MS <sup>3</sup> [717.4382→671.4385]: 509.3826(100), 391.0719(7.87)                                                                                     | (B2-b)-20-glc<br>(First found in ginseng)                                                                            | no. 20<br>no. 19 | [1] <sup>o</sup>   |
| 7 <sup>*</sup>   | 6.005 <sup>a</sup> | C <sub>42</sub> H <sub>74</sub> O <sub>15</sub> | 817.4922       | 817.4955        | -4.04      | [M-H] <sup>-</sup>    | MS <sup>2</sup> [817.4919]: 671.4344(72.87), 653.4237(41.80), 509.3836(100)<br>MS <sup>3</sup> [817.4919→509.3837]: 390.2670(100)                                                                   | Quinquenoside L <sub>9</sub> or its isomer<br>(First found in ginseng)                                               | no. 20           | [1] <sup>N,Q</sup> |
| 8 <sup>**</sup>  | 6.350 <sup>a</sup> | C <sub>48</sub> H <sub>80</sub> O <sub>20</sub> | 1021.5112      | 1021.5225       | -11.06     | [M+HCOO] <sup>-</sup> | MS <sup>2</sup> [1021.5113]: 975.5109(100), 815.4821(11.98)<br>MS <sup>3</sup> [1021.5113→975.5104]: 815.4704(47.05), 669.4099(100)<br>MS <sup>4</sup> [1021.5113→975.5104→669.4099]: 507.3565(100) | (C1-b)/(C3-b)/(B10)-6-glc-C <sub>6</sub> H <sub>8</sub> O <sub>5</sub> -20-rha<br>(Structure not found in SciFinder) | no. 20<br>no. 19 | New                |
| 9 <sup>**</sup>  | 6.970 <sup>d</sup> | C <sub>45</sub> H <sub>68</sub> O <sub>16</sub> | 863.4456       | 863.4435        | 2.43       | [M-H] <sup>-</sup>    | MS <sup>2</sup> [863.4454]: 717.3812(100), 537.3186(31.79), 391.2789(14.69)                                                                                                                         | Unknown(C <sub>33</sub> H <sub>48</sub> O <sub>7</sub> )-glc-rha<br>(Structure not found in SciFinder)               | no. 25           | New                |
| 10 <sup>*</sup>  | 7.487 <sup>b</sup> | C <sub>36</sub> H <sub>64</sub> O <sub>11</sub> | 717.4433       | 717.4431        | 0.28       | [M+HCOO] <sup>-</sup> | MS <sup>2</sup> [717.4435]: 671.4343(100)<br>MS <sup>3</sup> [717.4435→671.4343]: 509.3846(100)                                                                                                     | (B2-b)-glc <sup>e</sup><br>(First found in ginseng)                                                                  | no. 19           | [1] <sup>o</sup>   |
| 11 <sup>*</sup>  | 7.675 <sup>a</sup> | C <sub>48</sub> H <sub>82</sub> O <sub>19</sub> | 961.5301       | 961.5378        | -8.01      | [M-H] <sup>-</sup>    | MS <sup>2</sup> [961.5298]: 799.4790(57.41), 781.4657(81.63), 653.4219(100), 635.4123(89.70), 491.3708(40.63), 415.3250(8.70)                                                                       | (C1-a)/C2/(C3-a)-3-glc-20-glc-rha<br>(First found in ginseng)                                                        | no. 20           | [1] <sup>o</sup>   |
| 12 <sup>*</sup>  | 7.770 <sup>a</sup> | C <sub>41</sub> H <sub>72</sub> O <sub>15</sub> | 849.4806       | 849.4853        | -5.53      | [M+HCOO] <sup>-</sup> | MS <sup>2</sup> [849.4808]: 803.4776(100)<br>MS <sup>3</sup> [849.4808→803.4774]: 509.3744(100)                                                                                                     | (B2-b)-glc-xy <sup>l</sup> <sup>e</sup><br>(First found in ginseng)                                                  | no. 20<br>no. 19 | [1] <sup>o</sup>   |
| 13               | 7.903 <sup>a</sup> | C <sub>48</sub> H <sub>80</sub> O <sub>19</sub> | 1005.5202      | 1005.5276       | -7.36      | [M+HCOO] <sup>-</sup> | MS <sup>2</sup> [1005.5198]: 959.5156(100)<br>MS <sup>3</sup> [1005.5198→959.5151]: 779.4500(60.19), 471.3480(100)                                                                                  | (B8-b)-6-glc-rha-20-glc                                                                                              | no. 20           | [1]                |
| 14 <sup>**</sup> | 7.965 <sup>d</sup> | C <sub>35</sub> H <sub>44</sub> O <sub>10</sub> | 623.2878       | 623.2862        | 2.57       | [M+HCOO] <sup>-</sup> | MS <sup>2</sup> [623.2879]: 577.2841(100)<br>MS <sup>3</sup> [623.2879→577.2842]: 415.2188(100)                                                                                                     | Unknown-glc                                                                                                          | no. 20<br>no. 25 | New                |
| 15               | 7.975 <sup>a</sup> | C <sub>42</sub> H <sub>74</sub> O <sub>15</sub> | 863.4975       | 863.5010        | -4.05      | [M+HCOO] <sup>-</sup> | MS <sup>2</sup> [863.4973]: 817.4894(100)<br>MS <sup>3</sup> [863.4973→817.4896]: 671.4397(66.07), 653.4237(29.55), 509.3843(100)<br>MS <sup>4</sup> [863.4973→817.4896→509.3845]: 391.3000(100)    | Quinquenoside L <sub>9</sub> or its isomer                                                                           | no. 20<br>no. 19 | [1]                |
| 16 <sup>*</sup>  | 8.347 <sup>b</sup> | C <sub>36</sub> H <sub>62</sub> O <sub>11</sub> | 715.4279       | 715.4274        | 0.70       | [M+HCOO] <sup>-</sup> | MS <sup>2</sup> [715.4279]: 669.4187(100), 507.3682(84.53)                                                                                                                                          | Ginsenoside SL <sub>1</sub> or its isomer                                                                            | no. 19<br>no. 20 | [2] <sup>s</sup>   |
| 17 <sup>*</sup>  | 8.468 <sup>c</sup> | C <sub>30</sub> H <sub>54</sub> O <sub>5</sub>  | 493.2291       | -               | -          | [M-H] <sup>-</sup>    | MS <sup>2</sup> [493.2291]: 407.1580(100), 331.1223(4.55), 263.0733(53.51), 221.0679(14.43), 179.0554(13.30)                                                                                        | (B1-b)/(B2-a)                                                                                                        | no. 18<br>no. 19 | [1]                |

| no.              | Retention Time      | Molecular Formula                               | Measured (m/z) | Predicted (m/z) | Diff (ppm) | Ion                   | ESI-MS <sup>n</sup> Data                                                                                                                                                                                                                              | Identification                                                                                                                   | Sample                               | Ref              |
|------------------|---------------------|-------------------------------------------------|----------------|-----------------|------------|-----------------------|-------------------------------------------------------------------------------------------------------------------------------------------------------------------------------------------------------------------------------------------------------|----------------------------------------------------------------------------------------------------------------------------------|--------------------------------------|------------------|
|                  |                     |                                                 |                |                 |            |                       |                                                                                                                                                                                                                                                       |                                                                                                                                  | no. 20<br>no. 25                     |                  |
| 18 <sup>*</sup>  | 8.875 <sup>b</sup>  | C <sub>30</sub> H <sub>52</sub> O <sub>5</sub>  | 491.2136       | -               | -          | [M-H] <sup>-</sup>    | MS <sup>2</sup> [491.2136]: 405.1436(100)                                                                                                                                                                                                             | Isomer of hydroxyl PPT<br>(First found in ginseng)                                                                               | no. 19                               |                  |
| 19 <sup>**</sup> | 9.168 <sup>d</sup>  | C <sub>45</sub> H <sub>70</sub> O <sub>17</sub> | 881.4549       | 881.4540        | 1.02       | [M-H] <sup>-</sup>    | MS <sup>2</sup> [881.4550]: 823.4218(17.73), 735.4004(35.88), 677.3571(97.45),<br>555.3343(15.43), 515.3014(8.70), 497.2947(100)                                                                                                                      | Unknown(C <sub>30</sub> H <sub>44</sub> O <sub>7</sub> )-glc-rha-<br>C <sub>3</sub> H <sub>6</sub> O<br>(Not found in SciFinder) | no. 25                               | New              |
| 20               | 9.183 <sup>b</sup>  | C <sub>42</sub> H <sub>72</sub> O <sub>15</sub> | 815.4788       | 815.4798        | -1.23      | [M-H] <sup>-</sup>    | MS <sup>2</sup> [815.4790]: 653.4222(5.07), 553.3394(64.75), 491.3685(3.04),<br>391.2864(100)                                                                                                                                                         | B6/(B4-b)-glc-glc <sup>+</sup>                                                                                                   | no. 19<br>no. 18<br>no. 25           | [1]              |
| 21 <sup>*</sup>  | 9.273 <sup>b</sup>  | C <sub>36</sub> H <sub>64</sub> O <sub>11</sub> | 717.4444       | 717.4431        | 1.81       | [M+HCOO] <sup>-</sup> | MS <sup>2</sup> [717.4447]: 671.4352(100)<br>MS <sup>3</sup> [717.4447→671.4354]: 509.3957(100)                                                                                                                                                       | Vinaginsenoside R <sub>12</sub> or its isomer<br>(First found in ginseng)                                                        | no. 19<br>no. 20                     | [1] <sup>o</sup> |
| 22               | 9.335 <sup>a</sup>  | C <sub>48</sub> H <sub>82</sub> O <sub>20</sub> | 1023.5291      | 1023.5381       | -8.79      | [M+HCOO] <sup>-</sup> | MS <sup>2</sup> [1023.5289]: 977.5180(100)<br>MS <sup>3</sup> [1023.5289→977.5179]: 491.3475(100)                                                                                                                                                     | B6/(B3-b)/(B4-b)-glc-glc-glc <sup>+</sup>                                                                                        | no. 20<br>no. 19                     | [1]              |
| 23 <sup>**</sup> | 9.447 <sup>b</sup>  | C <sub>35</sub> H <sub>40</sub> O <sub>7</sub>  | 617.2671       | 617.2756        | -13.77     | [M+HCOO] <sup>-</sup> | MS <sup>2</sup> [617.2656]: 571.2617(100)<br>MS <sup>3</sup> [617.2656→571.2617]: 439.1954(100), 277.1775(100)                                                                                                                                        | Unknown(C <sub>30</sub> H <sub>32</sub> O <sub>3</sub> )-xyl<br>(Similar structure not found in<br>SciFinder)                    | no. 19<br>no. 18                     | New              |
| 24               | 9.725 <sup>a</sup>  | C <sub>42</sub> H <sub>74</sub> O <sub>15</sub> | 863.4933       | 863.5010        | -8.92      | [M+HCOO] <sup>-</sup> | MS <sup>2</sup> [863.4932]: 817.4901(100)<br>MS <sup>3</sup> [863.4932→816.4893]: 493.3853(100), 417.3250(8.59)                                                                                                                                       | (C1-a)-glc-glc <sup>+</sup>                                                                                                      | no. 20                               | [1]              |
| 25               | 10.165 <sup>c</sup> | C <sub>48</sub> H <sub>82</sub> O <sub>19</sub> | 961.5394       | 961.5378        | 1.66       | [M-H] <sup>-</sup>    | MS <sup>2</sup> [961.5393]: 799.4859(20.96), 637.4331(69.96), 475.3793(100),<br>391.2783(6.76)                                                                                                                                                        | PPT-6-glc-glc-glc                                                                                                                | no. 18                               | [1]              |
| 26               | 10.548 <sup>b</sup> | C <sub>42</sub> H <sub>72</sub> O <sub>15</sub> | 861.4835       | 861.4853        | -2.09      | [M+HCOO] <sup>-</sup> | MS <sup>2</sup> [861.4831]: 815.4795(100)<br>MS <sup>3</sup> [861.4831→815.4796]: 491.3663(100), 403.3212(13.27)                                                                                                                                      | Ginsenoside Res or its isomer                                                                                                    | no. 18<br>no. 19<br>no. 20<br>no. 25 | [1]              |
| 27 <sup>*</sup>  | 10.965 <sup>a</sup> | C <sub>41</sub> H <sub>72</sub> O <sub>15</sub> | 849.4805       | 849.4853        | -5.65      | [M+HCOO] <sup>-</sup> | MS <sup>2</sup> [849.4805]: 803.4790(100)<br>MS <sup>3</sup> [849.4805→803.4790]: 509.3637(100), 293.0794(100)                                                                                                                                        | (B2-b)-glc-xyl <sup>+</sup><br>(First found in ginseng)                                                                          | no. 20<br>no. 19                     | [1]              |
| 28 <sup>**</sup> | 11.687 <sup>d</sup> | C <sub>54</sub> H <sub>84</sub> O <sub>26</sub> | 573.2556       | 573.2553        | 0.52       | [M-2H] <sup>2-</sup>  | MS <sup>2</sup> [573.2557(2)]: 985.4663(100)<br>MS <sup>3</sup> [573.2557(2)→985.4663]: 643.3430(100), 463.2941(23.54)                                                                                                                                | Unknown(C <sub>30</sub> H <sub>44</sub> O <sub>6</sub> )-glc-glc-glc-<br>glc<br>(Not found in SciFinder)                         | no. 25                               | New              |
| 29               | 11.828 <sup>a</sup> | C <sub>48</sub> H <sub>82</sub> O <sub>20</sub> | 977.5263       | 977.5327        | -6.55      | [M-H] <sup>-</sup>    | MS <sup>2</sup> [977.5259]: 815.4760(100), 797.4652(68.20), 653.4182(98.94),<br>491.3715(37.42), 403.3275(4.21)<br>MS <sup>3</sup> [977.5259→815.4762]: 653.4205(16.70), 491.3712(100)<br>MS <sup>4</sup> [977.5259→815.4762→653.4208]: 491.3790(100) | (B4-b)/B6-6-glc-20-glc-glc                                                                                                       | no. 20                               | [1]              |
| 30               | 11.928 <sup>a</sup> | C <sub>54</sub> H <sub>92</sub> O <sub>23</sub> | 1107.5863      | 1107.5957       | -8.49      | [M-H] <sup>-</sup>    | MS <sup>2</sup> [1107.5868]: 945.5319(100), 783.4859(27.26), 765.4632(15.28),<br>637.4230(18.33), 475.3764(51.70)                                                                                                                                     | PPT-6-glc(-glc)-rha-20-glc                                                                                                       | no. 20                               | [1]              |
| 31               | 12.102 <sup>a</sup> | C <sub>42</sub> H <sub>72</sub> O <sub>15</sub> | 861.4809       | 861.4853        | -5.11      | [M+HCOO] <sup>-</sup> | MS <sup>2</sup> [861.4807]: 815.4721(100)<br>MS <sup>3</sup> [861.4807→816.4758]: 653.4464(56.98), 491.3775(100),<br>391.2779(85.47)<br>MS <sup>4</sup> [861.4807→816.4758→653.4466]: 491.3685(100)                                                   | B6-6-glc-glc                                                                                                                     | no. 20<br>no. 19<br>no. 25           | [1]              |
| 32               | 12.153 <sup>a</sup> | C <sub>42</sub> H <sub>72</sub> O <sub>14</sub> | 845.4826       | 845.4904        | -9.23      | [M+HCOO] <sup>-</sup> | MS <sup>2</sup> [845.4824]: 799.4701(77.31), 637.4203(100)<br>MS <sup>3</sup> [845.4824→637.4202]: 475.3866                                                                                                                                           | PPT-20-glc-glc                                                                                                                   | no. 20<br>no. 18                     | [1]              |

| no.             | Retention Time      | Molecular Formula                               | Measured (m/z) | Predicted (m/z) | Diff (ppm) | Ion                   | ESI-MS <sup>n</sup> Data                                                                                                                                                                       | Identification                                                                                         | Sample                     | Ref              |
|-----------------|---------------------|-------------------------------------------------|----------------|-----------------|------------|-----------------------|------------------------------------------------------------------------------------------------------------------------------------------------------------------------------------------------|--------------------------------------------------------------------------------------------------------|----------------------------|------------------|
| 33              | 12.637 <sup>a</sup> | C <sub>53</sub> H <sub>90</sub> O <sub>23</sub> | 1093.5715      | 1093.5800       | -7.77      | [M-H] <sup>-</sup>    | MS <sup>2</sup> [1093.5709]: 961.5190(63.16), 931.5140(26.59), 799.4861(46.43), 637.4299(93.26), 475.3763(100)                                                                                 | PPT-6-glc-20-glc-(glc)-xyl                                                                             | no. 20                     | [1]              |
| 34              | 12.660 <sup>a</sup> | C <sub>52</sub> H <sub>88</sub> O <sub>22</sub> | 1063.5652      | 1063.5694       | -3.95      | [M-H] <sup>-</sup>    | MS <sup>2</sup> [1063.5652]: 931.4915(12.10), 799.4861(9.71), 637.4290(100), 475.3783(53.52)                                                                                                   | PPT-6-glc-20-glc-(xyl)-xyl                                                                             | no. 20                     | [1]              |
| 35 <sup>*</sup> | 13.443 <sup>a</sup> | C <sub>36</sub> H <sub>64</sub> O <sub>11</sub> | 717.4407       | 717.4431        | -3.35      | [M+HCOO] <sup>-</sup> | MS <sup>2</sup> [717.4410]: 671.4346(100), 509.3822(27.61)<br>MS <sup>3</sup> [717.4410→671.4348]: 510.3794(100)<br>MS <sup>4</sup> [717.4410→671.4348→510.3795]: 391.2779(100), 347.1508(100) | (B2-b)-glc <sup>c</sup><br>(First found in ginseng)                                                    | no. 20<br>no. 19           | [1] <sup>Q</sup> |
| 36              | 13.832 <sup>a</sup> | C <sub>48</sub> H <sub>82</sub> O <sub>19</sub> | 961.5335       | 961.5378        | -4.47      | [M-H] <sup>-</sup>    | MS <sup>2</sup> [961.5333]: 799.4800(54.30), 781.4852(31.32), 637.4369(28.01), 619.4211(100), 475.3777(93.45), 391.2904(9.93)                                                                  | PPT-6-glc-glc-glc                                                                                      | no. 20<br>no. 25           | [1]              |
| 37              | 14.317 <sup>a</sup> | C <sub>41</sub> H <sub>72</sub> O <sub>14</sub> | 787.4843       | 787.4849        | -0.76      | [M-H] <sup>-</sup>    | MS <sup>2</sup> [787.4846]: 655.4427(14.49), 493.3866(100)<br>MS <sup>3</sup> [787.4846→655.4429]: 493.3859(100)                                                                               | (B2-a)/(B1-b)-glc-xyl<br>(First found in ginseng)                                                      | no. 20                     |                  |
| 38              | 14.500 <sup>a</sup> | C <sub>47</sub> H <sub>78</sub> O <sub>19</sub> | 945.4996       | 945.5065        | -7.30      | [M-H] <sup>-</sup>    | MS <sup>2</sup> [945.4994]: 765.4423(100), 603.3894(32.11), 441.3332(6.82)                                                                                                                     | Unknown(C <sub>29</sub> H <sub>48</sub> O <sub>4</sub> )-glc-glc-glc                                   | no. 20<br>no. 19           |                  |
| 39              | 14.743 <sup>c</sup> | C <sub>41</sub> H <sub>70</sub> O <sub>14</sub> | 831.4758       | 831.4748        | 1.20       | [M+HCOO] <sup>-</sup> | MS <sup>2</sup> [831.4760]: 785.4689(100)<br>MS <sup>3</sup> [831.4760→785.4688]: 653.4302(62.93), 491.3745(84.73), 391.2857(100)                                                              | (B4-b)/B6-glc-xyl <sup>f</sup>                                                                         | no. 18<br>no. 19           | [1]              |
| 40              | 15.098 <sup>d</sup> | C <sub>45</sub> H <sub>70</sub> O <sub>16</sub> | 865.4600       | 865.4591        | 1.04       | [M-H] <sup>-</sup>    | MS <sup>2</sup> [865.4600]: 719.3996(93.02), 539.3384(100), 509.2889(5.33)                                                                                                                     | Unknown(C <sub>33</sub> H <sub>50</sub> O <sub>7</sub> )-glc-rha<br>(Structure not found in SciFinder) | no. 25                     | New              |
| 41 <sup>*</sup> | 15.560 <sup>a</sup> | C <sub>36</sub> H <sub>62</sub> O <sub>10</sub> | 699.4306       | 699.4325        | -2.72      | [M+HCOO] <sup>-</sup> | MS <sup>2</sup> [699.4308]: 653.4255(50.22), 553.3346(100), 491.3771(9.41), 391.2819(39.15)                                                                                                    | B6/(B3-b)-glc <sup>c</sup><br>(First found in ginseng)                                                 | no. 20<br>no. 19           | [1] <sup>N</sup> |
| 42              | 15.617 <sup>a</sup> | C <sub>41</sub> H <sub>70</sub> O <sub>14</sub> | 831.4698       | 831.4748        | -6.01      | [M+HCOO] <sup>-</sup> | MS <sup>2</sup> [831.4698]: 785.4672(100)<br>MS <sup>3</sup> [831.4698→785.4670]: 653.4170(13.21), 491.3703(100)<br>MS <sup>4</sup> [831.4698→785.4670→653.4171]: 491.3709(100)                | (B4-b)-glc-xyl <sup>f</sup>                                                                            | no. 20                     | [1]              |
| 43              | 15.880 <sup>a</sup> | C <sub>54</sub> H <sub>92</sub> O <sub>23</sub> | 1107.5895      | 1107.5957       | -5.60      | [M-H] <sup>-</sup>    | MS <sup>2</sup> [1107.5896]: 945.5340(100), 637.4306(26.19), 619.4085(9.83), 475.3783(22.82)<br>MS <sup>3</sup> [1107.5896→945.5336]: 799.4593(100), 475.3783(100)                             | Ginsenoside Re <sub>8</sub> or its isomer                                                              | no. 20<br>no. 19           | [1]              |
| 44              | 16.285 <sup>a</sup> | C <sub>42</sub> H <sub>72</sub> O <sub>15</sub> | 861.4788       | 861.4853        | -7.55      | [M+HCOO] <sup>-</sup> | MS <sup>2</sup> [861.4785]: 815.4720(35.20), 653.4178(100), 635.4057(38.06), 553.3378(77.63), 391.2779(11.22)<br>MS <sup>3</sup> [861.4785→653.4181]: 553.3296(100), 391.2967(79.69)           | (B3-b)/(B4-b)-6-glc-glc                                                                                | no. 20<br>no. 19           | [1]              |
| 45              | 16.305 <sup>b</sup> | C <sub>36</sub> H <sub>62</sub> O <sub>10</sub> | 699.4341       | 699.4325        | 2.29       | [M+HCOO] <sup>-</sup> | MS <sup>2</sup> [699.4343]: 653.4219(100), 491.3742(35.38)<br>MS <sup>3</sup> [699.4343→653.4220]: 491.3750(100), 403.3195(12.16), 391.2779(2.90)                                              | (B4-b)/B4-glc                                                                                          | no. 20<br>no. 19           | [1]              |
| 46              | 16.558 <sup>c</sup> | C <sub>48</sub> H <sub>82</sub> O <sub>19</sub> | 961.5321       | 961.5378        | 4.47       | [M-H] <sup>-</sup>    | MS <sup>2</sup> [961.5423]: 799.4776(29.77), 637.4300(68.66), 619.4210(6.15), 475.3791(100), 391.2808(20.04)<br>MS <sup>3</sup> [961.5423→475.3791]: 391.2880(100)                             | 20-glc-ginsenoside Rf or its isomer                                                                    | no. 18                     | [1]              |
| 47              | 16.832 <sup>a</sup> | C <sub>42</sub> H <sub>72</sub> O <sub>14</sub> | 799.4806       | 799.4849        | -5.38      | [M-H] <sup>-</sup>    | MS <sup>2</sup> [799.4807]: 699.3916(17.35), 553.3347(100), 535.3234(23.70), 391.2823(90.94)                                                                                                   | (B3-b)-glc-rha <sup>f</sup>                                                                            | no. 20<br>no. 19           | [1]              |
| 48              | 16.855 <sup>a</sup> | C <sub>41</sub> H <sub>70</sub> O <sub>14</sub> | 831.4711       | 831.4748        | -4.45      | [M+HCOO] <sup>-</sup> | MS <sup>2</sup> [831.4711]: 785.4690(76.96), 715.4031(46.56), 553.3407(49.45), 391.2856(100)<br>MS <sup>3</sup> [831.4711→785.4691]: 491.3601(100)                                             | B6-glc-xyl <sup>f</sup>                                                                                | no. 20<br>no. 19<br>no. 25 | [1]              |
| 49 <sup>*</sup> | 17.322 <sup>b</sup> | C <sub>36</sub> H <sub>62</sub> O <sub>10</sub> | 699.4340       | 699.4325        | 2.14       | [M+HCOO] <sup>-</sup> | MS <sup>2</sup> [699.4343]: 653.4283(100), 491.3772(57.96), 391.2815(33.28)<br>MS <sup>3</sup> [699.4343→653.4285]: 491.3615(100), 391.2779(99.68)                                             | (B4-b)/B6-glc<br>(First found in ginseng)                                                              | no. 19                     | [1] <sup>N</sup> |



| no.              | Retention Time      | Molecular Formula                               | Measured (m/z) | Predicted (m/z) | Diff (ppm) | Ion                   | ESI-MS <sup>n</sup> Data                                                                                                                                                                                              | Identification                                                                                               | Sample                               | Ref                |
|------------------|---------------------|-------------------------------------------------|----------------|-----------------|------------|-----------------------|-----------------------------------------------------------------------------------------------------------------------------------------------------------------------------------------------------------------------|--------------------------------------------------------------------------------------------------------------|--------------------------------------|--------------------|
| 50               | 17.393 <sup>a</sup> | C <sub>47</sub> H <sub>80</sub> O <sub>18</sub> | 931.5208       | 931.5272        | -6.87      | [M-H] <sup>-</sup>    | MS <sup>2</sup> [931.5206]: 799.4806(55.68), 637.4231(100), 619.4164(6.68), 475.3733(52.78), 391.2779(3.32)<br>MS <sup>3</sup> [931.5206→637.4230]: 391.2779(100)                                                     | Ginsenoside Re <sub>4</sub> or its isomer                                                                    | no. 20<br>no. 25<br>no. 19<br>no. 18 | [1]                |
| 51 <sup>*</sup>  | 17.445 <sup>a</sup> | C <sub>42</sub> H <sub>74</sub> O <sub>14</sub> | 801.4982       | 801.5006        | -2.99      | [M-H] <sup>-</sup>    | MS <sup>2</sup> [801.4980]: 655.4430(10.89), 637.4291(8.43), 493.3864(100), 417.3395(6.44)<br>MS <sup>3</sup> [801.4980→655.4429]: 493.3820(100)                                                                      | 25-hydroxy-ginsenoside Rg <sub>2</sub> or ginsenoside Rf <sub>2</sub> or its isomer (First found in ginseng) | no. 20<br>no. 19                     | [1] <sup>N</sup>   |
| 52               | 17.468 <sup>a</sup> | C <sub>41</sub> H <sub>70</sub> O <sub>14</sub> | 831.4727       | 831.4748        | -2.53      | [M+HCOO] <sup>-</sup> | MS <sup>2</sup> [831.4730]: 785.4711(100), 653.4262(2.40)<br>MS <sup>3</sup> [831.4730→785.4713]: 653.4101(38.00), 491.3753(100), 391.2812(97.97)<br>MS <sup>4</sup> [831.4730→785.4713→653.4101]: 391.2779(100)      | (B3-b)/(B6)-glc-xyl                                                                                          | no. 20<br>no. 25                     | [1]                |
| 53               | 18.360 <sup>a</sup> | C <sub>48</sub> H <sub>82</sub> O <sub>19</sub> | 961.5310       | 961.5378        | -7.07      | [M-H] <sup>-</sup>    | MS <sup>2</sup> [961.5306]: 799.4853(35.59), 637.4322(34.89), 475.3773(100), 391.2779(12.07)                                                                                                                          | 20-glc-ginsenoside Rf or its isomer                                                                          | no. 20<br>no. 19<br>no. 25           | [1]                |
| 54 <sup>*</sup>  | 18.458 <sup>a</sup> | C <sub>36</sub> H <sub>62</sub> O <sub>10</sub> | 699.4285       | 699.4325        | -5.72      | [M+HCOO] <sup>-</sup> | MS <sup>2</sup> [699.4287]: 653.4196(100), 553.3346(67.48), 491.3776(13.10), 391.2716(11.22)<br>MS <sup>3</sup> [699.4287→653.4199]: 491.3685(100)                                                                    | (B4-b)/(B6)-glc (First found in ginseng)                                                                     | no. 19<br>no. 20<br>no. 25           | [1] <sup>N</sup>   |
| 55               | 18.697 <sup>a</sup> | C <sub>42</sub> H <sub>72</sub> O <sub>14</sub> | 799.4838       | 799.4849        | -1.38      | [M-H] <sup>-</sup>    | MS <sup>2</sup> [799.4839]: 653.4204(23.16), 635.4090(14.05), 491.3732(100), 403.3181(7.11)<br>MS <sup>3</sup> [799.4839→653.4205]: 491.3699(100)                                                                     | B6-glc-rha (First found in ginseng)                                                                          | no. 20<br>no. 19                     | [1] <sup>Q,N</sup> |
| 56               | 19.308 <sup>a</sup> | C <sub>53</sub> H <sub>90</sub> O <sub>22</sub> | 1077.5771      | 1077.5851       | -7.42      | [M-H] <sup>-</sup>    | MS <sup>2</sup> [1077.5769]: 945.5353(100), 799.4827(14.20), 783.4806(37.04), 637.4246(80.32), 619.4138(16.61), 475.3769(57.48), 391.2779(3.51)<br>MS <sup>3</sup> [1077.5769→945.5348]: 637.4110(100), 457.3610(100) | Floraginsenoside M/N or its isomer                                                                           | no. 20                               | [1]                |
| 57 <sup>**</sup> | 19.317 <sup>b</sup> | C <sub>48</sub> H <sub>80</sub> O <sub>18</sub> | 989.5305       | 989.5327        | -2.22      | [M+HCOO] <sup>-</sup> | MS <sup>2</sup> [989.5299]: 943.5149(100)<br>MS <sup>3</sup> [989.5299→943.5148]: 763.4574(100), 617.3911(15.50)                                                                                                      | PPD-gluA-glc-rha (Structure not found in SciFinder)                                                          | no. 19                               | New                |
| 58 <sup>**</sup> | 20.045 <sup>a</sup> | C <sub>36</sub> H <sub>64</sub> O <sub>10</sub> | 701.4468       | 701.4482        | -2.00      | [M+HCOO] <sup>-</sup> | MS <sup>2</sup> [701.4473]: 655.4324(100), 493.3847(58.09)<br>MS <sup>3</sup> [701.4473→654.4171]: 493.3859(100), 392.2902(25.12)                                                                                     | (B1-b)-glc (Structure not found in SciFinder)                                                                | no. 20<br>no. 19<br>no. 25           | New                |
| 59 <sup>*</sup>  | 20.143 <sup>a</sup> | C <sub>42</sub> H <sub>74</sub> O <sub>14</sub> | 801.5008       | 801.5006        | 0.25       | [M-H] <sup>-</sup>    | MS <sup>2</sup> [801.5004]: 655.4418(9.89), 637.4144(7.05), 493.3878(100), 417.3273(3.54)                                                                                                                             | Ginsenoside Rf <sub>2</sub> or its isomer (First found in ginseng)                                           | no. 20                               | [3] <sup>R</sup>   |
| 60               | 20.240 <sup>b</sup> | C <sub>47</sub> H <sub>80</sub> O <sub>18</sub> | 931.5275       | 931.5272        | 0.32       | [M-H] <sup>-</sup>    | MS <sup>2</sup> [931.5271]: 799.4876(28.20), 637.4284(98.78), 475.3754(100), 391.2885(23.75)<br>MS <sup>3</sup> [931.5271→475.3753]: 391.2967(100)                                                                    | Notoginsenoside R <sub>1</sub> /Ginsenoside R <sub>1</sub> , or its isomer                                   | no. 18<br>no. 19<br>no. 20<br>no. 25 | [1]                |
| 61               | 20.247 <sup>a</sup> | C <sub>41</sub> H <sub>70</sub> O <sub>14</sub> | 785.4693       | 785.4693        | 0          | [M-H] <sup>-</sup>    | MS <sup>2</sup> [785.4695]: 653.4223(38.48), 491.3714(100), 403.3283(3.44)<br>MS <sup>3</sup> [785.4695→653.4226]: 491.3625(100)                                                                                      | (B4-b)/(B6)-glc-xyl <sup>†</sup>                                                                             | no. 20                               | [1]                |
| 62 <sup>**</sup> | 20.270 <sup>a</sup> | C <sub>43</sub> H <sub>72</sub> O <sub>16</sub> | 843.4735       | 843.4748        | -1.54      | [M-H] <sup>-</sup>    | MS <sup>2</sup> [843.4733]: 799.4767(100)<br>MS <sup>3</sup> [843.4733→799.4764]: 653.4222(44.40), 635.4042(44.40), 491.3685(88.79), 391.4842(100)                                                                    | Unknown(C <sub>31</sub> H <sub>52</sub> O <sub>7</sub> )-glc-rha (Not found in SciFinder)                    | no. 20<br>no. 19                     | New                |
| 63               | 20.400 <sup>d</sup> | C <sub>48</sub> H <sub>82</sub> O <sub>19</sub> | 961.5321       | 961.5378        | -5.93      | [M-H] <sup>-</sup>    | MS <sup>2</sup> [961.5319]: 799.4765(34.88), 637.4329(65.93), 475.3839(100)                                                                                                                                           | 20-glc-ginsenoside Rf or its isomer                                                                          | no. 25                               | [1]                |

| no.              | Retention Time        | Molecular Formula                               | Measured (m/z) | Predicted (m/z) | Diff (ppm) | Ion                   | ESI-MS <sup>n</sup> Data                                                                                                                                                                  | Identification                                                                                         | Sample                               | Ref              |
|------------------|-----------------------|-------------------------------------------------|----------------|-----------------|------------|-----------------------|-------------------------------------------------------------------------------------------------------------------------------------------------------------------------------------------|--------------------------------------------------------------------------------------------------------|--------------------------------------|------------------|
| 64 <sup>*</sup>  | 21.028 <sup>a</sup>   | C <sub>36</sub> H <sub>62</sub> O <sub>10</sub> | 699.4287       | 699.4325        | -5.43      | [M+HCOO] <sup>-</sup> | MS <sup>2</sup> [699.4288]: 653.4216(100), 491.3714(21.32)<br>MS <sup>3</sup> [699.4288→653.4218]: 491.3761(100), 403.3136(9.04)                                                          | (B4-b)/(B6)-glc<br>(First found in ginseng)                                                            | no. 20<br>no. 19                     | [1] <sup>N</sup> |
| 65 <sup>*</sup>  | 21.107 <sup>b,*</sup> | C <sub>48</sub> H <sub>80</sub> O <sub>18</sub> | 943.5289       | 943.5272        | 1.80       | [M-H] <sup>-</sup>    | MS <sup>2</sup> [943.5287]: 763.4603(100), 617.4051(98.99)                                                                                                                                | PPD-gluA-glc-rha<br>Ginsenoside R <sub>18</sub> or its isomer<br>(First found in ginseng)              | no. 19                               | [1] <sup>Q</sup> |
| 66               | 21.275 <sup>a</sup>   | C <sub>42</sub> H <sub>72</sub> O <sub>14</sub> | 799.4826       | 799.4849        | -2.88      | [M-H] <sup>-</sup>    | MS <sup>2</sup> [799.4825]: 653.4245(25.23), 635.4147(11.41), 491.3727(100), 391.2811(10.88)                                                                                              | (B4-b)/(B6)/(B3-b)-glc-rha <sup>‡</sup>                                                                | no. 20<br>no. 19<br>no. 25           | [1]              |
| 67               | 23.073 <sup>d</sup>   | C <sub>54</sub> H <sub>94</sub> O <sub>25</sub> | 570.2956       | 570.2969        | -2.28      | [M-2H] <sup>2-</sup>  | MS <sup>2</sup> [570.2955(2)]: 979.5417(30.29), 817.4942(66.12), 799.4868(100), 655.4459(32.56), 493.3806(5.60)<br>MS <sup>3</sup> [570.2955(2)→817.4937]: 655.4330(100), 493.3771(99.84) | Quinquenoside L <sub>16</sub> or its isomer                                                            | no. 25                               | [1]              |
| 68               | 23.330 <sup>d</sup>   | C <sub>48</sub> H <sub>82</sub> O <sub>19</sub> | 1007.5382      | 1007.5432       | -4.96      | [M+HCOO] <sup>-</sup> | MS <sup>2</sup> [1007.5378]: 961.5257(100)<br>MS <sup>3</sup> [1007.5378→961.5253]: 781.4607(39.53), 475.3701(100)                                                                        | 20-glc-ginsenoside R <sub>f</sub> or its isomer                                                        | no. 25                               | [1]              |
| 69 <sup>*</sup>  | 23.362 <sup>b</sup>   | C <sub>36</sub> H <sub>62</sub> O <sub>10</sub> | 699.4321       | 699.4325        | -0.57      | [M+HCOO] <sup>-</sup> | MS <sup>2</sup> [699.4320]: 653.4256(100), 491.3747(18.89)<br>MS <sup>3</sup> [699.4320→653.4258]: 491.3717(100), 392.2977(9.49)                                                          | (B4-b)/(B6)-glc<br>(First found in ginseng)                                                            | no. 19                               | [1] <sup>N</sup> |
| 70               | 23.482 <sup>a</sup>   | C <sub>53</sub> H <sub>90</sub> O <sub>22</sub> | 1077.5766      | 1077.5851       | -7.89      | [M-H] <sup>-</sup>    | MS <sup>2</sup> [1077.5769]: 945.5338(65.00), 799.4820(23.27), 783.4856(32.87), 637.4265(87.76), 475.3785(100)<br>MS <sup>3</sup> [1077.5769→637.4264]: 475.3852(100)                     | Floralginsenoside N or its isomer                                                                      | no. 20<br>no. 19                     | [1]              |
| 71               | 23.535 <sup>b</sup>   | C <sub>42</sub> H <sub>72</sub> O <sub>14</sub> | 845.4901       | 845.4904        | -0.35      | [M+HCOO] <sup>-</sup> | MS <sup>2</sup> [845.4897]: 799.4784(100)<br>MS <sup>3</sup> [845.4897→799.4784]: 653.4343(6.26), 635.4042(6.26), 491.3705(100)                                                           | Pseudo-ginsenoside F <sub>11</sub> , or its isomer                                                     | no. 19                               | [1]              |
| 72               | 24.750 <sup>c</sup>   | C <sub>47</sub> H <sub>80</sub> O <sub>18</sub> | 977.5343       | 977.5327        | 1.64       | [M+HCOO] <sup>-</sup> | MS <sup>2</sup> [977.5343]: 931.5263(100), 799.5080(2.90), 637.4298(2.90)<br>MS <sup>3</sup> [977.5343→931.5259]: 637.4298(74.94), 475.3748(100)                                          | Notoginsenoside R <sub>i</sub> or its isomer                                                           | no. 18<br>no. 20<br>no. 25           | [1]              |
| 73               | 26.267 <sup>a</sup>   | C <sub>48</sub> H <sub>80</sub> O <sub>18</sub> | 943.5219       | 943.5272        | -5.62      | [M-H] <sup>-</sup>    | MS <sup>2</sup> [943.5217]: 797.4791(33.41), 635.4244(100), 617.3994(94.79), 473.3569(44.69)                                                                                              | A3-glc-glc-rha <sup>‡</sup>                                                                            | no. 20<br>no. 19                     | [1]              |
| 74 <sup>**</sup> | 26.555 <sup>b</sup>   | C <sub>38</sub> H <sub>66</sub> O <sub>13</sub> | 775.4551       | 775.4485        | 8.51       | [M+HCOO] <sup>-</sup> | MS <sup>2</sup> [775.4549]: 729.4399(100)<br>MS <sup>3</sup> [775.4549→730.4454]: 583.3904(33.33), 421.3375(100)                                                                          | Unknown(C <sub>26</sub> H <sub>46</sub> O <sub>4</sub> )-glc-rha<br>(Structure not found in SciFinder) | no. 19                               | New              |
| 75               | 26.843 <sup>a</sup>   | C <sub>53</sub> H <sub>92</sub> O <sub>24</sub> | 1111.5833      | 1111.5906       | -6.57      | [M-H] <sup>-</sup>    | MS <sup>2</sup> [1111.5831]: 979.5278(15.84), 817.4868(100), 799.4827(89.05), 655.4439(44.95), 637.4230(14.41), 493.3739(10.01)<br>MS <sup>3</sup> [1111.5831→817.4865]: 493.3991(100)    | Chikusetsusaponin FM <sub>1</sub> or its isomer                                                        | no. 20                               | [1]              |
| 76               | 27.890 <sup>c</sup>   | C <sub>42</sub> H <sub>72</sub> O <sub>14</sub> | 845.4924       | 845.4904        | 2.37       | [M+HCOO] <sup>-</sup> | MS <sup>2</sup> [845.4923]: 799.4835(100), 637.4334(89.49), 619.4203(4.39), 475.3816(28.85)<br>MS <sup>3</sup> [845.4923→799.4835]: 637.4308(100), 391.2853(17.36)                        | PPT-6-glc-20-glc<br>(Ginsenoside R <sub>g1</sub> )                                                     | no. 18<br>no. 20<br>no. 19<br>no. 25 |                  |
| 77               | 28.292 <sup>a</sup>   | C <sub>48</sub> H <sub>82</sub> O <sub>19</sub> | 961.5287       | 961.5260        | -9.46      | [M-H] <sup>-</sup>    | MS <sup>2</sup> [961.5287]: 637.4271(100), 475.3852(29.04)                                                                                                                                | 20-glc-ginsenoside R <sub>f</sub> or its isomer                                                        | no. 20<br>no. 25                     | [1]              |

| no.             | Retention Time      | Molecular Formula                               | Measured (m/z) | Predicted (m/z) | Diff (ppm) | Ion                   | ESI-MS <sup>n</sup> Data                                                                                                                                                                                                                                            | Identification                                                                           | Sample                               | Ref                |
|-----------------|---------------------|-------------------------------------------------|----------------|-----------------|------------|-----------------------|---------------------------------------------------------------------------------------------------------------------------------------------------------------------------------------------------------------------------------------------------------------------|------------------------------------------------------------------------------------------|--------------------------------------|--------------------|
| 78              | 29.890 <sup>b</sup> | C <sub>41</sub> H <sub>70</sub> O <sub>14</sub> | 831.4746       | 831.4748        | -0.24      | [M+HCOO] <sup>-</sup> | MS <sup>2</sup> [831.4743]: 785.4668(100)<br>MS <sup>3</sup> [831.4743→785.4670]: 491.3685(100)                                                                                                                                                                     | (B3-b)/(B4-b)/B6/C2-glc-xyI                                                              | no. 19<br>no. 20                     | [1]                |
| 79              | 29.052 <sup>a</sup> | C <sub>48</sub> H <sub>80</sub> O <sub>20</sub> | 1021.5190      | 1021.5225       | -3.43      | [M+HCOO] <sup>-</sup> | MS <sup>2</sup> [1021.5186]: 975.5063(100)<br>MS <sup>3</sup> [1021.5186→975.5060]: 868.4707(21.18), 653.4157(100), 633.3767(21.18), 491.3790(21.18)<br>MS <sup>4</sup> [1021.5186→975.5060→653.4158]: 491.3790(100)                                                | (B8-b)-6-glc-glc-20-glc                                                                  | no. 20                               | [1]                |
| 80              | 29.308 <sup>a</sup> | C <sub>42</sub> H <sub>72</sub> O <sub>15</sub> | 861.4796       | 861.4853        | -6.62      | [M+HCOO] <sup>-</sup> | MS <sup>2</sup> [861.4793]: 815.4704(96.15), 797.4598(100), 651.4050(48.79)<br>MS <sup>3</sup> [861.4793→797.4595]: 391.2779(100)                                                                                                                                   | (C3-b)-glc-rha                                                                           | no. 20                               | [1]                |
| 81 <sup>*</sup> | 30.072 <sup>a</sup> | C <sub>54</sub> H <sub>90</sub> O <sub>24</sub> | 1121.5694      | 1121.5749       | -4.90      | [M-H] <sup>-</sup>    | MS <sup>2</sup> [1121.5692]: 959.5147(97.94), 797.4622(100), 635.4042(16.86), 473.3618(52.23)<br>MS <sup>3</sup> [1121.5692→797.4620]: 389.2760(100)                                                                                                                | A3-6-glc-glc-20-glc-glc<br>(First found in ginseng)                                      | no. 20                               | [1] <sup>Q</sup>   |
| 82 <sup>*</sup> | 30.463 <sup>a</sup> | C <sub>42</sub> H <sub>72</sub> O <sub>14</sub> | 845.4863       | 845.4904        | -4.85      | [M+HCOO] <sup>-</sup> | MS <sup>2</sup> [845.4859]: 799.4803(100), 637.4318(12.14)<br>MS <sup>3</sup> [845.4859→799.4802]: 637.4230(100), 491.3664(100)                                                                                                                                     | (B3-b)/(B4-b)/(B6)-glc-rha<br>(First found in ginseng)                                   | no. 20                               | [1] <sup>Q,N</sup> |
| 83 <sup>*</sup> | 30.790 <sup>a</sup> | C <sub>47</sub> H <sub>80</sub> O <sub>18</sub> | 931.5213       | 931.5272        | -6.33      | [M-H] <sup>-</sup>    | MS <sup>2</sup> [931.5212]: 769.4734(25.65), 637.4324(100), 475.3761(100)                                                                                                                                                                                           | Isomer of notoginsenoside R <sub>1</sub><br>(First found in ginseng)                     | no. 20                               | [1] <sup>N</sup>   |
| 84              | 34.212 <sup>a</sup> | C <sub>48</sub> H <sub>82</sub> O <sub>18</sub> | 991.5405       | 991.5483        | -7.87      | [M+HCOO] <sup>-</sup> | MS <sup>2</sup> [991.5402]: 946.5390(100), 945.5391(47.59), 799.4952(3.80)<br>MS <sup>3</sup> [991.5402→945.5388]: 559.2262(66.67), 475.3783(100)                                                                                                                   | Isomer of ginsenoside Re                                                                 | no. 20<br>no. 19                     | [1]                |
| 85              | 35.347 <sup>a</sup> | C <sub>48</sub> H <sub>82</sub> O <sub>18</sub> | 945.5406       | 945.5428        | -2.33      | [M+HCOO] <sup>-</sup> | MS <sup>2</sup> [945.5401]: 799.4797(18.11), 783.4874(36.33), 637.4268(49.07), 619.4155(25.51), 475.3773(100), 391.2826(20.99)<br>MS <sup>3</sup> [945.5401→637.4268]: 553.3206(12.83), 475.3791(100)                                                               | PPT-6-glc-rha-20-glc (Ginsenoside Re)                                                    | no. 18<br>no. 20<br>no. 19<br>no. 25 |                    |
| 86              | 38.815 <sup>a</sup> | C <sub>48</sub> H <sub>84</sub> O <sub>20</sub> | 979.5424       | 979.5483        | -6.02      | [M-H] <sup>-</sup>    | MS <sup>2</sup> [979.5419]: 817.4923(100), 799.4796(45.92), 655.4397(52.53), 637.4224(16.72), 493.3824(6.77)<br>MS <sup>3</sup> [979.5419→817.4922]: 655.4341(100), 493.3859(78.94)<br>MS <sup>4</sup> [979.5419→817.4922→655.4341]: 493.3876(100), 375.2964(47.62) | Vinaginsenoside R <sub>13</sub> or its isomer                                            | no. 20                               | [1]                |
| 87 <sup>*</sup> | 39.873 <sup>a</sup> | C <sub>36</sub> H <sub>62</sub> O <sub>10</sub> | 653.4247       | 653.4270        | -3.52      | [M-H] <sup>-</sup>    | MS <sup>2</sup> [653.4248]: 521.3275(33.49), 491.3738(100), 391.2842(37.52)                                                                                                                                                                                         | (B4-b)/(B6)-glc<br>(First found in ginseng)                                              | no. 20<br>no. 19                     | [1] <sup>N</sup>   |
| 88 <sup>*</sup> | 40.127 <sup>a</sup> | C <sub>35</sub> H <sub>56</sub> O <sub>9</sub>  | 665.3882       | 655.3906        | -3.61      | [M+HCOO] <sup>-</sup> | MS <sup>2</sup> [665.3881]: 619.3816(100), 457.3330(83.87)                                                                                                                                                                                                          | Unknown(C <sub>29</sub> H <sub>48</sub> O <sub>4</sub> )-glc<br>(First found in ginseng) | no. 20                               |                    |
| 89 <sup>*</sup> | 40.195 <sup>a</sup> | C <sub>36</sub> H <sub>62</sub> O <sub>10</sub> | 699.4306       | 699.4325        | -2.72      | [M+HCOO] <sup>-</sup> | MS <sup>2</sup> [699.4307]: 653.4194(100), 491.3714(36.05), 391.2748(6.72)<br>MS <sup>3</sup> [699.4307→653.4197]: 491.3779(100)                                                                                                                                    | (B4-b)/(B6)-glc<br>(First found in ginseng)                                              | no. 20                               | [1] <sup>N</sup>   |
| 90 <sup>*</sup> | 40.242 <sup>a</sup> | C <sub>48</sub> H <sub>80</sub> O <sub>18</sub> | 943.5258       | 943.5272        | -1.48      | [M-H] <sup>-</sup>    | MS <sup>2</sup> [943.5255]: 799.4829(28.22), 783.4897(55.64), 637.4265(100), 619.4152(41.13), 475.3760(76.80)<br>MS <sup>3</sup> [943.5255→637.4264]: 475.3694(100), 353.2473(56.34)                                                                                | (A2-a)-glc-glc-glc<br>(First found in ginseng)                                           | no. 20                               |                    |
| 91 <sup>*</sup> | 40.478 <sup>a</sup> | C <sub>42</sub> H <sub>70</sub> O <sub>12</sub> | 765.4433       | 765.4795        | -47.29     | [M-H] <sup>-</sup>    | MS <sup>2</sup> [765.4331]: 619.3849(8.63), 457.3297(100), 415.3153(3.04)<br>MS <sup>3</sup> [765.4331→619.3849]: 457.3205(100)                                                                                                                                     | Ginsenoside Rg <sub>31</sub> or its isomer<br>(First found in ginseng)                   | no. 20<br>no. 19                     | [1] <sup>Q,N</sup> |
| 92              | 40.605 <sup>a</sup> | C <sub>42</sub> H <sub>70</sub> O <sub>14</sub> | 843.4718       | 843.4748        | -3.56      | [M+HCOO] <sup>-</sup> | MS <sup>2</sup> [843.4717]: 797.4668(100), 635.4104(37.69), 617.3823(13.81), 473.3569(24.21)<br>MS <sup>3</sup> [843.4717→797.4666]: 635.4281(100), 473.3569(66.67)                                                                                                 | A3-glc-glc<br>(First found in ginseng)                                                   | no. 20                               | [1]                |

| no.              | Retention Time      | Molecular Formula                               | Measured (m/z) | Predicted (m/z) | Diff (ppm) | Ion                   | ESI-MS <sup>n</sup> Data                                                                                                                                                                                                                                               | Identification                                                      | Sample                               | Ref              |
|------------------|---------------------|-------------------------------------------------|----------------|-----------------|------------|-----------------------|------------------------------------------------------------------------------------------------------------------------------------------------------------------------------------------------------------------------------------------------------------------------|---------------------------------------------------------------------|--------------------------------------|------------------|
| 93               | 40.677 <sup>a</sup> | C <sub>48</sub> H <sub>82</sub> O <sub>18</sub> | 945.5376       | 945.5428        | -5.50      | [M-H] <sup>-</sup>    | MS <sup>2</sup> [945.5373]: 799.4862(37.72), 783.4946(24.95), 637.4240(100), 619.4164(17.77), 475.3771(86.41), 391.2833(5.69)                                                                                                                                          | Isomer of ginsenoside Re                                            | no. 20                               | [1]              |
| 94 <sup>*</sup>  | 40.913 <sup>b</sup> | C <sub>36</sub> H <sub>62</sub> O <sub>10</sub> | 699.4335       | 699.4325        | 1.43       | [M+HCOO] <sup>-</sup> | MS <sup>2</sup> [699.4340]: 653.4231(99.55), 491.3776(100)<br>MS <sup>3</sup> [699.4340→491.3777]: 403.3212(100)                                                                                                                                                       | B6/(B4-b)-glc<br>(First found in ginseng)                           | no. 19                               | [1] <sup>N</sup> |
| 95 <sup>**</sup> | 40.932 <sup>a</sup> | C <sub>41</sub> H <sub>68</sub> O <sub>13</sub> | 768.4657       | 768.466         | -0.37      | [M+HCOO] <sup>-</sup> | MS <sup>2</sup> [813.4639]: 767.4578(100), 635.4058(34.42), 489.3553(4.17)                                                                                                                                                                                             | (B8-b)-rha-xy1<br>(Structure not found in SciFinder)                | no. 20<br>no. 19                     | New              |
| 96 <sup>**</sup> | 41.082 <sup>a</sup> | C <sub>54</sub> H <sub>92</sub> O <sub>24</sub> | 561.2898       | 561.2917        | -3.39      | [M-2H] <sup>2-</sup>  | MS <sup>2</sup> [561.2900(2)]: 961.5367(89.98), 799.4831(88.49), 781.4794(100), 637.4221(54.76), 475.3830(47.19), 375.2964(7.86)                                                                                                                                       | (B4-a)-6-glc-20-glc(-glc)-glc<br>(Structure not found in SciFinder) | no. 20                               | New              |
| 97 <sup>*</sup>  | 41.228 <sup>a</sup> | C <sub>48</sub> H <sub>80</sub> O <sub>19</sub> | 959.5170       | 959.5221        | -5.32      | [M-H] <sup>-</sup>    | MS <sup>2</sup> [959.5168]: 797.4654(74.48), 635.4148(22.34), 473.3640(100), 389.2699(23.22)<br>MS <sup>3</sup> [959.5168→797.4651]: 635.4161(36.17), 473.3662(100), 389.2760(36.17)                                                                                   | Notoginsenoside G or its isomer                                     | no. 20                               |                  |
| 98               | 41.593 <sup>a</sup> | C <sub>53</sub> H <sub>90</sub> O <sub>23</sub> | 1093.5762      | 1093.5800       | -3.47      | [M-H] <sup>-</sup>    | MS <sup>2</sup> [1093.5757]: 961.5298(41.13), 799.4782(100), 781.4700(56.86), 637.4247(63.32), 475.3744(62.94)<br>MS <sup>3</sup> [1093.5757→799.4780]: 637.4226(70.56), 475.3782(100), 391.2405(4.57)<br>MS <sup>4</sup> [1093.5757→799.4780→637.4225]: 475.3700(100) | PPT-6-glc-xy1-20-glc-glc                                            | no. 20<br>no. 19                     | [1]              |
| 99               | 41.617 <sup>c</sup> | C <sub>41</sub> H <sub>70</sub> O <sub>13</sub> | 815.4827       | 815.4798        | 3.56       | [M+HCOO] <sup>-</sup> | MS <sup>2</sup> [815.4829]: 769.4734(100), 619.4248(44.63)<br>MS <sup>3</sup> [815.4829→769.4729]: 619.4254(100), 476.3833(66.45)                                                                                                                                      | PPT-glc-xy1                                                         | no. 18<br>no. 20                     | [1]              |
| 100              | 42.017 <sup>a</sup> | C <sub>53</sub> H <sub>90</sub> O <sub>23</sub> | 1093.5766      | 1093.5800       | -3.11      | [M-H] <sup>-</sup>    | MS <sup>2</sup> [1093.5762]: 961.5317(29.12), 799.4778(90.05), 781.4718(75.72), 637.4244(100), 475.3760(81.60)<br>MS <sup>3</sup> [1093.5762→637.4243]: 475.3769(100), 387.3239(13.62), 375.3872(12.74)                                                                | (B4-a)-6-glc-xy1-20-glc-glc                                         | no. 20<br>no. 19                     | [1]              |
| 101              | 42.380 <sup>b</sup> | C <sub>41</sub> H <sub>70</sub> O <sub>13</sub> | 815.4801       | 815.4798        | 0.37       | [M+HCOO] <sup>-</sup> | MS <sup>2</sup> [815.4803]: 769.4711(51.08), 655.4431(15.47), 637.4266(100), 475.3777(35.95)<br>MS <sup>3</sup> [815.4803→637.4264]: 475.3886(100)                                                                                                                     | PPT-glc-xy1                                                         | no. 18<br>no. 19<br>no. 20<br>no. 25 | [1]              |
| 102              | 42.568 <sup>a</sup> | C <sub>44</sub> H <sub>74</sub> O <sub>15</sub> | 887.4971       | 887.5010        | -4.39      | [M+HCOO] <sup>-</sup> | MS <sup>2</sup> [887.4969]: 841.4861(29.53), 799.4873(14.18), 781.4734(100), 637.4224(9.02), 619.4169(32.27)<br>MS <sup>3</sup> [887.4969→781.4735]: 619.4142(100), 475.3989(23.27)                                                                                    | AcO-ginsenoside Rg <sub>1</sub>                                     | no. 20<br>no. 18<br>no. 25           | [1]              |
| 103              | 42.743 <sup>a</sup> | C <sub>53</sub> H <sub>90</sub> O <sub>23</sub> | 1093.5754      | 1093.5800       | -4.21      | [M-H] <sup>-</sup>    | MS <sup>2</sup> [1093.5754]: 961.5257(20.12), 799.4768(74.57), 781.4682(59.33), 637.4233(100), 475.3762(76.80)<br>MS <sup>3</sup> [1093.5754→637.4229]: 475.3789(100), 387.3351(13.70)                                                                                 | PPT-6-glc-glc-20-glc-xy1                                            | no. 20                               | [1]              |
| 104              | 42.767 <sup>a</sup> | C <sub>48</sub> H <sub>80</sub> O <sub>18</sub> | 943.5208       | 943.5272        | -6.78      | [M-H] <sup>-</sup>    | MS <sup>2</sup> [943.5207]: 797.4645(100), 635.4053(33.15), 617.4119(24.18), 473.3672(12.09)                                                                                                                                                                           | (B8-a)-3-glc-20-glc-rha                                             | no. 20                               | [1]              |
| 105              | 42.860 <sup>a</sup> | C <sub>42</sub> H <sub>74</sub> O <sub>15</sub> | 817.4945       | 817.4955        | -1.22      | [M-H] <sup>-</sup>    | MS <sup>2</sup> [817.4943]: 655.4359(100), 493.3860(52.55), 375.2859(2.64)<br>MS <sup>3</sup> [817.4943→655.4360]: 537.3410(4.23), 493.3903(100), 491.3708(13.53), 399.3244(6.26), 375.2903(29.94)                                                                     | (B2-a)-3-glc-20-glc                                                 | no. 20                               | [1]              |
| 106              | 42.868 <sup>b</sup> | C <sub>48</sub> H <sub>82</sub> O <sub>19</sub> | 961.5363       | 961.5378        | -1.56      | [M-H] <sup>-</sup>    | MS <sup>2</sup> [961.5361]: 799.4816(88.88), 781.4715(37.96), 637.4258(100), 475.3777(76.25)<br>MS <sup>3</sup> [961.5361→637.4255]: 475.3812(100), 387.3258(19.20), 375.2808(10.86)                                                                                   | PPT-6-glc-20-glc-glc                                                | no. 19<br>no. 18                     | [1]              |
| 107              | 42.888 <sup>a</sup> | C <sub>48</sub> H <sub>80</sub> O <sub>19</sub> | 959.5172       | 959.5221        | -5.11      | [M-H] <sup>-</sup>    | MS <sup>2</sup> [959.5170]: 797.4630(58.15), 635.4143(44.11), 473.3577(100)                                                                                                                                                                                            | (A3)/(B8-a)-3-glc-20-glc-glc                                        | no. 20                               | [1]              |

| no.               | Retention Time      | Molecular Formula                                | Measured (m/z) | Predicted (m/z) | Diff (ppm) | Ion                   | ESI-MS <sup>n</sup> Data                                                                                                                                                                                                                                                                                                               | Identification                                                                                         | Sample                     | Ref                |
|-------------------|---------------------|--------------------------------------------------|----------------|-----------------|------------|-----------------------|----------------------------------------------------------------------------------------------------------------------------------------------------------------------------------------------------------------------------------------------------------------------------------------------------------------------------------------|--------------------------------------------------------------------------------------------------------|----------------------------|--------------------|
| 108               | 42.945 <sup>a</sup> | C <sub>48</sub> H <sub>82</sub> O <sub>19</sub>  | 961.5326       | 961.5378        | -5.41      | [M-H] <sup>-</sup>    | MS <sup>2</sup> [961.5323]: 799.4811(100), 781.4726(36.88), 637.4254(97.21), 619.4170(13.93), 537.3452(10.32), 475.3755(66.10), 387.3289(5.43)<br>MS <sup>3</sup> [961.5323→799.4811]: 637.4269(90.25), 475.3786(100), 375.3789(7.54)<br>MS <sup>4</sup> [961.5323→799.4811→637.4266]: 475.3783(100), 387.3227(42.88), 375.2780(28.49) | B5-3-glc-glc-20-glc                                                                                    | no. 20<br>no. 19<br>no. 25 | [1]                |
| 109               | 43.030 <sup>a</sup> | C <sub>42</sub> H <sub>72</sub> O <sub>14</sub>  | 799.4849       | 799.4849        | 0          | [M-H] <sup>-</sup>    | MS <sup>2</sup> [799.4847]: 637.4303(100), 475.3783(69.74)<br>MS <sup>3</sup> [799.4847→637.4302]: 387.3165(100)                                                                                                                                                                                                                       | Isomer of ginsenoside Rf                                                                               | no. 20                     | [1]                |
| 110 <sup>*</sup>  | 43.527 <sup>a</sup> | C <sub>42</sub> H <sub>70</sub> O <sub>14</sub>  | 843.4712       | 843.4748        | -4.27      | [M+HCOO] <sup>-</sup> | MS <sup>2</sup> [843.4708]: 797.4677(100)<br>MS <sup>3</sup> [843.4708→797.4674]: 635.4042(100), 473.3569(33.33)<br>MS <sup>4</sup> [843.4708→797.4674→635.4041]: 473.3466(100)                                                                                                                                                        | (B8-a)/(A3)-3-glc-20-glc<br>(First found in ginseng)                                                   | no. 20<br>no. 19<br>no. 25 | [1] <sup>Q,N</sup> |
| 111 <sup>*</sup>  | 43.583 <sup>a</sup> | C <sub>36</sub> H <sub>60</sub> O <sub>10</sub>  | 697.4142       | 697.4169        | -6.45      | [M+HCOO] <sup>-</sup> | MS <sup>2</sup> [697.4125]: 651.4100(100), 489.3762(8.78)                                                                                                                                                                                                                                                                              | (B8-b)-glc<br>(First found in ginseng)                                                                 | no. 20<br>no. 19           | [1] <sup>N</sup>   |
| 112 <sup>*</sup>  | 43.865 <sup>a</sup> | C <sub>36</sub> H <sub>62</sub> O <sub>10</sub>  | 699.3946       | -               | -          | [M+HCOO] <sup>-</sup> | MS <sup>2</sup> [699.3948]: 653.4322(14.84), 537.3404(100), 483.3173(11.35), 375.2888(70.46)                                                                                                                                                                                                                                           | (C2)/(C3-a)-glc                                                                                        | no. 20<br>no. 19           | [1] <sup>N</sup>   |
| 113               | 43.997 <sup>a</sup> | C <sub>42</sub> H <sub>72</sub> O <sub>13</sub>  | 783.4899       | 783.4900        | -0.13      | [M-H] <sup>-</sup>    | MS <sup>2</sup> [783.4902]: 637.4299(100), 619.4354(26.75), 475.3783(30.48), 417.3342(39.72)                                                                                                                                                                                                                                           | Isomer of ginsenoside Rg <sub>2</sub>                                                                  | no. 20                     | [1]                |
| 114 <sup>**</sup> | 44.095 <sup>a</sup> | C <sub>39</sub> H <sub>68</sub> O <sub>14</sub>  | 805.4600       | 805.4591        | 1.12       | [M+HCOO] <sup>-</sup> | MS <sup>2</sup> [805.4597]: 759.4501(100)<br>MS <sup>3</sup> [805.4597→759.4501]: 597.4013(31.25), 435.3427(100), 375.2780(7.99)<br>MS <sup>4</sup> [805.4597→759.4501→597.4014]: 435.3394(100)                                                                                                                                        | Unknown(C <sub>27</sub> H <sub>48</sub> O <sub>4</sub> )-glc-glc<br>(Structure not found in SciFinder) | no. 20<br>no. 19           | New                |
| 115               | 44.303 <sup>a</sup> | C <sub>47</sub> H <sub>80</sub> O <sub>18</sub>  | 931.5238       | 931.5272        | -3.65      | [M-H] <sup>-</sup>    | MS <sup>2</sup> [931.5237]: 799.4823(69.50), 769.4728(24.40), 637.4217(31.30), 537.3410(20.95), 475.3773(100), 353.1049(62.60), 329.1969(20.95)                                                                                                                                                                                        | Isomer of notoginsenoside R <sub>1</sub>                                                               | no. 20<br>no. 19           | [1]                |
| 116               | 44.393 <sup>c</sup> | C <sub>54</sub> H <sub>86</sub> O <sub>24</sub>  | 1117.5424      | 1117.5436       | -1.07      | [M-H] <sup>-</sup>    | MS <sup>2</sup> [1117.5422]: 793.4384(66.23), 613.3742(100), 569.3845(39.88), 523.3779(65.17), 453.3377(44.76)                                                                                                                                                                                                                         | OA-gluA-glc-glc-glc                                                                                    | no. 18                     | [1]                |
| 117               | 44.545 <sup>d</sup> | C <sub>60</sub> H <sub>102</sub> O <sub>28</sub> | 634.3178       | 634.3206        | -4.41      | [M-2H] <sup>2-</sup>  | MS <sup>2</sup> [634.3178(2)]: 1107.5885(32.77), 945.5358(53.31), 783.4851(100), 765.4724(23.88), 621.4329(40.03)<br>MS <sup>3</sup> [634.3178(2)→783.4855]: 459.3886(100)                                                                                                                                                             | Quinquenoside V or its isomer                                                                          | no. 25<br>no. 20           | [1]                |
| 118 <sup>*</sup>  | 44.640 <sup>a</sup> | C <sub>42</sub> H <sub>70</sub> O <sub>13</sub>  | 827.4775       | 827.4798        | -2.78      | [M+HCOO] <sup>-</sup> | MS <sup>2</sup> [827.4774]: 781.4713(100)<br>MS <sup>3</sup> [827.4774→781.4650]: 617.3911(100)                                                                                                                                                                                                                                        | (A2-a)-glc-rha<br>(First found in ginseng)                                                             | no. 20<br>no. 19<br>no. 18 | [1] <sup>Q,N</sup> |
| 119               | 44.745 <sup>a</sup> | C <sub>64</sub> H <sub>108</sub> O <sub>31</sub> | 685.3338       | 685.3365        | -3.94      | [M-2H] <sup>2-</sup>  | MS <sup>2</sup> [685.3341(2)]: 1209.6371(22.77), 1077.5868(36.83), 945.5383(82.81), 783.4909(100), 621.4332(22.77), 619.8172(34.15), 553.2947(65.74), 485.1597(95.04)                                                                                                                                                                  | Notoginsenoside D or its isomer                                                                        | no. 20                     | [1]                |
| 120               | 44.873 <sup>b</sup> | C <sub>48</sub> H <sub>82</sub> O <sub>17</sub>  | 975.5504       | 975.5534        | -3.08      | [M+HCOO] <sup>-</sup> | MS <sup>2</sup> [975.5504]: 929.5354(100)<br>MS <sup>3</sup> [975.5504→929.5352]: 621.4332(66.45), 475.3852(100)                                                                                                                                                                                                                       | PPT-rha-glc-rha <sup>‡</sup>                                                                           | no. 20<br>no. 19           | [1]                |
| 121               | 44.980 <sup>a</sup> | C <sub>42</sub> H <sub>70</sub> O <sub>14</sub>  | 843.4713       | 843.4748        | -4.15      | [M+HCOO] <sup>-</sup> | MS <sup>2</sup> [843.4710]: 797.4637(100)<br>MS <sup>3</sup> [843.4710→797.4634]: 473.3569(100)                                                                                                                                                                                                                                        | A3-glc-glc                                                                                             | no. 20<br>no. 19           | [1]                |
| 122 <sup>**</sup> | 45.002 <sup>b</sup> | C <sub>38</sub> H <sub>64</sub> O <sub>14</sub>  | 743.4226       | 743.4223        | 0.40       | [M-H] <sup>-</sup>    | MS <sup>2</sup> [743.4225]: 597.3617(70.84), 435.3087(100), 417.2935(7.98)                                                                                                                                                                                                                                                             | Unknown(C <sub>26</sub> H <sub>44</sub> O <sub>5</sub> )-glc-rha<br>(Structure not found in SciFinder) | no. 19<br>no. 20           | New                |

| no.              | Retention Time      | Molecular Formula                                | Measured (m/z) | Predicted (m/z) | Diff (ppm) | Ion                   | ESI-MS <sup>n</sup> Data                                                                                                                                                                                                                                                                                                                                                                                                          | Identification                                                            | Sample                               | Ref              |
|------------------|---------------------|--------------------------------------------------|----------------|-----------------|------------|-----------------------|-----------------------------------------------------------------------------------------------------------------------------------------------------------------------------------------------------------------------------------------------------------------------------------------------------------------------------------------------------------------------------------------------------------------------------------|---------------------------------------------------------------------------|--------------------------------------|------------------|
| 123              | 45.425 <sup>a</sup> | C <sub>59</sub> H <sub>100</sub> O <sub>27</sub> | 1239.6376      | 1239.6379       | -0.24      | [M-H] <sup>-</sup>    | MS <sup>2</sup> [1239.6375]: 1107.5838(100), 945.5309(83.40), 783.4846(52.15), 621.4318(23.25), 459.3808(11.46)<br>MS <sup>3</sup> [1239.6375→1107.5840]: 945.5307(100), 783.4961(43.05), 621.4271(70.40), 459.3886(37.68)<br>MS <sup>4</sup> [1239.6375→1107.5840→945.5305]: 460.3736(100)                                                                                                                                       | Notoginsenoside R <sub>4</sub> or its isomer                              | no. 18<br>no. 20<br>no. 19<br>no. 25 | [1]              |
| 124 <sup>*</sup> | 45.683 <sup>a</sup> | C <sub>41</sub> H <sub>70</sub> O <sub>14</sub>  | 785.4694       | 785.4693        | 0.13       | [M-H] <sup>-</sup>    | MS <sup>2</sup> [785.4698]: 653.4215(100), 491.3782(8.56), 415.3236(9.22)                                                                                                                                                                                                                                                                                                                                                         | Vinaginsenoside R <sub>11</sub> or its isomer<br>(First found in ginseng) | no. 20<br>no. 19<br>no. 18           |                  |
| 125              | 45.753 <sup>a</sup> | C <sub>42</sub> H <sub>74</sub> O <sub>15</sub>  | 863.4962       | 863.5010        | -5.56      | [M+HCOO] <sup>-</sup> | MS <sup>2</sup> [863.4960]: 817.4885(100)<br>MS <sup>3</sup> [863.4960→817.4882]: 655.4320(100), 493.3844(29.03)<br>MS <sup>4</sup> [863.4960→817.4882→655.4320]: 493.3971(100), 375.2859(46.83)                                                                                                                                                                                                                                  | (B2-a)/C4-glc-glc                                                         | no. 20                               | [1]              |
| 126              | 45.922 <sup>a</sup> | C <sub>54</sub> H <sub>86</sub> O <sub>24</sub>  | 1117.5414      | 1117.5436       | -1.97      | [M-H] <sup>-</sup>    | MS <sup>2</sup> [1117.5415]: 793.4316(75.86), 613.3667(100), 569.3816(47.60), 523.3750(74.36), 455.3489(42.25)                                                                                                                                                                                                                                                                                                                    | ginsenoside Ro <sub>a</sub> or its isomer                                 | no. 20                               | [1]              |
| 127              | 46.468 <sup>a</sup> | C <sub>42</sub> H <sub>72</sub> O <sub>14</sub>  | 799.4835       | 799.4849        | -1.75      | [M-H] <sup>-</sup>    | MS <sup>2</sup> [799.7304]: 653.4207(100), 635.4084(40.75), 491.3700(52.80), 415.3195(66.50)                                                                                                                                                                                                                                                                                                                                      | (B4-b)-3-glc-20-rha                                                       | no. 20<br>no. 19                     | [1]              |
| 128 <sup>*</sup> | 46.768 <sup>b</sup> | C <sub>36</sub> H <sub>62</sub> O <sub>10</sub>  | 699.4324       | 699.4325        | -0.14      | [M+HCOO] <sup>-</sup> | MS <sup>2</sup> [699.4326]: 654.4272(100)<br>MS <sup>3</sup> [699.4326→653.4243]: 491.3895(100)                                                                                                                                                                                                                                                                                                                                   | (B3-b)/B6-glc<br>(First found in ginseng)                                 | no. 19<br>no. 20                     | [1] <sup>N</sup> |
| 129              | 46.813 <sup>b</sup> | C <sub>42</sub> H <sub>72</sub> O <sub>14</sub>  | 799.4871       | 799.4849        | 2.75       | [M-H] <sup>-</sup>    | MS <sup>2</sup> [799.4871]: 637.4270(29.39), 475.3768(100), 391.2836(47.88)<br>MS <sup>3</sup> [799.4871→475.3769]: 391.2847(100)                                                                                                                                                                                                                                                                                                 | PPT-6-glc-glc<br>(Ginsenoside Rf)                                         | no. 18<br>no. 19<br>no. 20<br>no. 25 |                  |
| 130              | 46.827 <sup>c</sup> | C <sub>54</sub> H <sub>90</sub> O <sub>23</sub>  | 552.2868       | 552.2864        | 0.72       | [M-2H] <sup>2-</sup>  | MS <sup>2</sup> [552.2867(2)]: 943.5224(100), 781.4754(96.11), 619.3990(6.77), 457.3568(5.12)<br>MS <sup>3</sup> [552.2867(2)→945.5223]: 782.4642(85.71), 457.3655(100)                                                                                                                                                                                                                                                           | (B7-a)-3-glc-glc-20-glc-glc                                               | no. 18                               | [1]              |
| 131              | 47.788 <sup>a</sup> | C <sub>58</sub> H <sub>98</sub> O <sub>26</sub>  | 1209.6248      | 1209.6274       | -2.15      | [M-H] <sup>-</sup>    | MS <sup>2</sup> [1209.6248]: 1077.5747(100), 1078.5756(69.03), 945.5338(28.46), 915.5240(14.02), 783.4842(34.05), 765.4759(11.79), 621.4310(23.88), 459.3793(4.82)<br>MS <sup>3</sup> [1209.6248→1077.5746]: 945.5284(53.33), 783.4818(100), 621.4302(84.66), 537.3392(8.36), 459.3795(50.57), 375.2857(5.28)<br>MS <sup>4</sup> [1209.6248→1077.5746→783.4822]: 622.4370(100), 460.3837(67.10), 376.2878(67.10), 375.2964(67.10) | Notoginsenoside Fc or its isomer                                          | no. 20<br>no. 19<br>no. 25           | [1]              |
| 132              | 48.038 <sup>a</sup> | C <sub>59</sub> H <sub>100</sub> O <sub>27</sub> | 1239.6355      | 1239.6379       | -1.94      | [M-H] <sup>-</sup>    | MS <sup>2</sup> [1239.6353]: 1107.5865(100), 1077.5757(20.28), 945.5373(66.13), 783.4870(47.48), 621.4329(17.37), 459.3828(8.87)<br>MS <sup>3</sup> [1239.6353→1107.5868]: 945.5374(100), 783.4876(75.67), 621.4463(38.56), 459.3886(11.71)                                                                                                                                                                                       | Notoginsenoside R <sub>4</sub> or its isomer                              | no. 20<br>no. 19<br>no. 25           | [1]              |
| 133              | 48.095 <sup>a</sup> | C <sub>48</sub> H <sub>80</sub> O <sub>18</sub>  | 943.5238       | 943.5272        | -3.60      | [M-H] <sup>-</sup>    | MS <sup>2</sup> [943.5235]: 781.4676(100), 619.4196(74.67), 601.4008(11.80)<br>MS <sup>3</sup> [943.5235→781.4678]: 620.4185(100), 619.3928(100), 458.3742(100)                                                                                                                                                                                                                                                                   | (A2-a)/B9-glc-glc-glc <sup>d</sup>                                        | no. 20                               | [1]              |
| 134              | 48.265 <sup>b</sup> | C <sub>54</sub> H <sub>92</sub> O <sub>23</sub>  | 1107.5966      | 1107.5957       | 0.81       | [M-H] <sup>-</sup>    | MS <sup>2</sup> [1107.5964]: 945.5356(98.28), 783.4876(100), 621.4320(47.67), 459.3814(26.18)<br>MS <sup>3</sup> [1107.5964→783.4879]: 621.4325(100), 537.3520(14.91), 459.3874(93.57), 441.3813(14.91), 375.2849(29.90)                                                                                                                                                                                                          | PPD-3-glc-glc-20-glc-glc (Gin-senoside Rb <sub>1</sub> )                  | no. 18<br>no. 19<br>no. 20<br>no. 25 |                  |

| no. | Retention Time      | Molecular Formula                               | Measured (m/z) | Predicted (m/z) | Diff (ppm) | Ion                   | ESI-MS <sup>n</sup> Data                                                                                                                                                                                                                                                                       | Identification                                                                | Sample                               | Ref |
|-----|---------------------|-------------------------------------------------|----------------|-----------------|------------|-----------------------|------------------------------------------------------------------------------------------------------------------------------------------------------------------------------------------------------------------------------------------------------------------------------------------------|-------------------------------------------------------------------------------|--------------------------------------|-----|
| 135 | 48.562 <sup>b</sup> | C <sub>41</sub> H <sub>70</sub> O <sub>13</sub> | 815.4800       | 815.4798        | 0.25       | [M+HCOO] <sup>-</sup> | MS <sup>2</sup> [815.4801]: 769.4729(100), 637.4260(33.18), 475.3813(17.67)<br>MS <sup>3</sup> [815.4801→769.4729]: 637.4264(65.17), 476.3780(100), 475.3752(68.64), 391.2779(13.74)                                                                                                           | Ginsenoside F <sub>3</sub> , Notoginsenoside R <sub>2</sub> , or their isomer | no. 18<br>no. 20<br>no. 19<br>no. 25 | [1] |
| 136 | 49.537 <sup>a</sup> | C <sub>58</sub> H <sub>98</sub> O <sub>26</sub> | 1209.6171      | 1209.6274       | -8.52      | [M-H] <sup>-</sup>    | MS <sup>2</sup> [1209.6169]: 1077.5698(100), 1047.5624(11.25), 945.5320(56.48), 915.5181(24.72), 783.4850(73.94), 621.4313(31.71), 459.3814(8.92)<br>MS <sup>3</sup> [1209.6169→1077.5898]: 945.5375(54.18), 915.5164(14.81), 784.4817(100), 783.4964(96.50), 621.4309(35.87), 459.3886(21.81) | Ginsenoside Ra <sub>1</sub> /Ra <sub>2</sub> or its isomer                    | no. 20<br>no. 19                     | [1] |
| 137 | 49.583 <sup>b</sup> | C <sub>53</sub> H <sub>90</sub> O <sub>22</sub> | 1077.5844      | 1077.5851       | -0.65      | [M-H] <sup>-</sup>    | MS <sup>2</sup> [1077.5844]: 945.5385(69.94), 783.4885(100), 621.4330(66.91), 459.3818(28.27)<br>MS <sup>3</sup> [1077.5844→783.4888]: 621.4308(82.78), 537.3338(9.92), 459.3815(100), 375.2811(48.02)                                                                                         | Ginsenoside Rc or its isomer                                                  | no. 18<br>no. 20<br>no. 19<br>no. 25 | [1] |
| 138 | 48.935 <sup>c</sup> | C <sub>57</sub> H <sub>94</sub> O <sub>26</sub> | 1193.5982      | 1193.5961       | 1.76       | [M-H] <sup>-</sup>    | MS <sup>2</sup> [1193.5980]: 1150.6069(100), 1049.5938(26.85), 1108.6275(22.93)<br>MS <sup>3</sup> [1193.5980→1149.5938]: 1108.5834(100), 1107.5558(80.46), 927.5289(80.46)                                                                                                                    | Malonyl-Ginsenoside Rb <sub>1</sub> , or its isomer                           | no. 18                               | [1] |
| 139 | 50.287 <sup>a</sup> | C <sub>58</sub> H <sub>98</sub> O <sub>26</sub> | 604.3051       | 604.3100        | -8.11      | [M-2H] <sup>2-</sup>  | MS <sup>2</sup> [604.3054(2)]: 945.5319(20.10), 783.4839(100), 765.4747(39.97), 621.4330(17.7), 539.2935(20.39), 459.3790(4.87)<br>MS <sup>3</sup> [604.3054(2)→783.4839]: 621.4349(53.80), 459.3864(100)                                                                                      | Ginsenoside Ra <sub>1</sub> , Ra <sub>2</sub> , or their isomer               | no. 20<br>no. 25                     | [1] |
| 140 | 50.525 <sup>c</sup> | C <sub>48</sub> H <sub>76</sub> O <sub>19</sub> | 955.4944       | 955.4908        | 3.77       | [M-H] <sup>-</sup>    | MS <sup>2</sup> [955.4945]: 793.4390(100), 731.4397(3.64), 613.3748(36.86), 569.3851(29.55), 523.3788(66.91), 455.3520(11.71)<br>MS <sup>3</sup> [955.4945→793.4390]: 613.3725(100), 569.3812(51.96), 523.3794(80.95), 455.3520(35.06)                                                         | Ginsenoside Ro or its isomer                                                  | no. 18<br>no. 20<br>no. 25           | [1] |
| 141 | 50.775 <sup>a</sup> | C <sub>58</sub> H <sub>98</sub> O <sub>26</sub> | 1209.6176      | 1209.6274       | -8.10      | [M-H] <sup>-</sup>    | MS <sup>2</sup> [1209.6176]: 1077.5754(100), 945.5341(50.61), 783.4888(63.40), 621.4305(34.61), 459.3799(13.60)<br>MS <sup>3</sup> [1209.6176→1077.5753]: 945.5356(28.64), 783.4847(23.82), 621.4233(100), 459.3799(33.36)                                                                     | Ginsenoside Ra <sub>1</sub> /Ra <sub>2</sub> or its isomer                    | no. 20<br>no. 25                     | [1] |
| 142 | 50.932 <sup>b</sup> | C <sub>36</sub> H <sub>62</sub> O <sub>9</sub>  | 683.4387       | 683.4376        | 1.61       | [M+HCOO] <sup>-</sup> | MS <sup>2</sup> [683.4391]: 637.4304(100), 475.3793(89.06)<br>MS <sup>3</sup> [683.4391→637.4302]: 391.2779(100)                                                                                                                                                                               | Ginsenoside Rh <sub>1</sub>                                                   | no. 18<br>no. 19<br>no. 20<br>no. 25 |     |
| 143 | 50.950 <sup>a</sup> | C <sub>42</sub> H <sub>72</sub> O <sub>13</sub> | 783.4929       | 783.4900        | 3.70       | [M-H] <sup>-</sup>    | MS <sup>2</sup> [783.4929]: 637.4242(21.25), 619.4127(13.06), 475.3760(100), 391.2831(34.21)<br>MS <sup>3</sup> [783.4929→637.4241]: 553.3407(13.74), 475.3793(100), 391.2967(27.47)                                                                                                           | Ginsenoside Rg <sub>2</sub>                                                   | no. 18<br>no. 20<br>no. 19<br>no. 25 |     |
| 144 | 51.103 <sup>a</sup> | C <sub>53</sub> H <sub>90</sub> O <sub>22</sub> | 1077.5817      | 1077.5851       | -3.16      | [M-H] <sup>-</sup>    | MS <sup>2</sup> [1077.5819]: 945.5350(57.44), 783.4874(100), 621.4314(55.00), 459.3810(30.35)<br>MS <sup>3</sup> [1077.5819→783.4875]: 621.4253(100), 459.3821(94.78), 375.2859(18.47)<br>MS <sup>4</sup> [1077.5819→783.4875→621.4255]: 459.3683(100)                                         | Ginsenoside Rb <sub>2</sub>                                                   | no. 18<br>no. 19<br>no. 20<br>no. 25 | [1] |
| 145 | 51.155 <sup>a</sup> | C <sub>42</sub> H <sub>72</sub> O <sub>13</sub> | 783.4870       | 783.4900        | -3.83      | [M-H] <sup>-</sup>    | MS <sup>2</sup> [783.4872]: 637.4265(22.92), 475.3782(100), 391.2856(35.25)<br>MS <sup>3</sup> [783.4872→637.4263]: 553.3519(66.67), 475.3680(100)                                                                                                                                             | Isomer of ginsenoside Rg <sub>2</sub>                                         | no. 20                               | [1] |

| no.              | Retention Time        | Molecular Formula                               | Measured (m/z) | Predicted (m/z) | Diff (ppm) | Ion                   | ESI-MS <sup>n</sup> Data                                                                                                                                                                                                                               | Identification                                                                    | Sample                               | Ref |
|------------------|-----------------------|-------------------------------------------------|----------------|-----------------|------------|-----------------------|--------------------------------------------------------------------------------------------------------------------------------------------------------------------------------------------------------------------------------------------------------|-----------------------------------------------------------------------------------|--------------------------------------|-----|
| 146              | 51.482 <sup>c</sup>   | C <sub>36</sub> H <sub>62</sub> O <sub>9</sub>  | 683.4370       | 683.4376        | -0.88      | [M+HCOO] <sup>-</sup> | MS <sup>2</sup> [683.4368]: 637.4232(100), 549.7537(21.61), 475.3838(46.40)                                                                                                                                                                            | Isomer of ginsenoside Rh <sub>1</sub>                                             | no. 18<br>no. 20<br>no. 19           | [1] |
| 147              | 52.018 <sup>c</sup>   | C <sub>47</sub> H <sub>74</sub> O <sub>18</sub> | 925.4810       | 925.4802        | 0.86       | [M-H] <sup>-</sup>    | MS <sup>2</sup> [925.4808]: 763.4280(71.25), 613.3742(100), 569.3845(29.67), 523.3789(25.36), 455.3492(20.05)                                                                                                                                          | Pseudoginsenoside Rt <sub>1</sub> or its isomer                                   | no. 18                               | [1] |
| 148              | 52.190 <sup>a</sup>   | C <sub>36</sub> H <sub>62</sub> O <sub>12</sub> | 683.4248       | 683.4223        | 3.66       | [M+HCOO] <sup>-</sup> | MS <sup>2</sup> [683.4245]: 637.4255(100), 475.3772(88.86)<br>MS <sup>3</sup> [683.4245→637.4254]: 553.3318(21.91), 475.3813(100), 391.2873(5.83)                                                                                                      | Ginsenoside F <sub>1</sub>                                                        | no. 20<br>no. 19                     | [1] |
| 149              | 51.910 <sup>a</sup>   | C <sub>58</sub> H <sub>98</sub> O <sub>26</sub> | 604.3042       | 604.3100        | -9.60      | [M-2H] <sup>2-</sup>  | MS <sup>2</sup> [604.3046(2)]: 945.5371(17.37), 783.4873(100), 765.4705(10.48), 621.4317(12.70)<br>MS <sup>3</sup> [604.3046(2)→783.4873]: 621.4355(20.09), 459.3826(100), 375.2780(16.14)                                                             | Ginsenoside Ra <sub>1</sub> /Ra <sub>2</sub> or its isomer                        | no. 20                               | [1] |
| 150 <sup>*</sup> | 52.235 <sup>a,*</sup> | C <sub>42</sub> H <sub>74</sub> O <sub>14</sub> | 801.4942       | 801.5006        | -7.99      | [M-H] <sup>-</sup>    | MS <sup>2</sup> [801.4942]: 639.4484(19.88), 477.3935(100), 401.3350(2.33)<br>MS <sup>3</sup> [801.4942→638.4295]: 477.3937(100)                                                                                                                       | 25-hydroxyl-ginsenoside Rg <sub>3</sub> or its isomer<br>(First found in ginseng) | no. 20                               |     |
| 151              | 52.315 <sup>a</sup>   | C <sub>54</sub> H <sub>92</sub> O <sub>23</sub> | 1107.5861      | 1107.5957       | -8.67      | [M-H] <sup>-</sup>    | MS <sup>2</sup> [1107.5863]: 945.5317(55.40), 783.4852(100), 621.4295(91.07), 459.3814(7.25)<br>MS <sup>3</sup> [1107.5863→783.4855]: 621.4355(100), 459.3845(29.69)                                                                                   | Ginsenoside B <sub>1</sub> or its isomer                                          | no. 20                               | [1] |
| 152              | 52.687 <sup>c</sup>   | C <sub>47</sub> H <sub>74</sub> O <sub>18</sub> | 925.4827       | 925.4802        | 2.70       | [M-H] <sup>-</sup>    | MS <sup>2</sup> [925.4826]: 763.4274(100), 613.3722(65.16), 569.3850(31.55), 523.3794(35.05), 455.3522(23.36)<br>MS <sup>3</sup> [925.4826→763.4274]: 613.3679(100), 569.3860(12.55), 523.3864(21.97), 455.3478(44.00)                                 | Pseudoginsenoside Rt <sub>1</sub> or its isomer                                   | no. 18                               | [1] |
| 153              | 52.782 <sup>a</sup>   | C <sub>48</sub> H <sub>80</sub> O <sub>18</sub> | 944.5307       | 944.5345        | -4.03      | [M-H] <sup>-</sup>    | MS <sup>2</sup> [943.5230]: 781.4643(100), 619.4057(23.97), 457.3598(58.82)                                                                                                                                                                            | B9-3-glc-20-glc-glc                                                               | no. 20                               | [1] |
| 154              | 52.965 <sup>a</sup>   | C <sub>52</sub> H <sub>88</sub> O <sub>21</sub> | 1047.5636      | 1047.5745       | -10.41     | [M-H] <sup>-</sup>    | MS <sup>2</sup> [1047.5637]: 915.5264(100), 753.4780(41.85), 735.4666(5.40), 621.4340(82.63), 459.3808(33.88)<br>MS <sup>3</sup> [1047.5637→915.5262]: 537.3191(100), 459.3683(100)                                                                    | PPD-3-glc-xy1-20-glc-xy1                                                          | no. 20<br>no. 18                     | [1] |
| 155              | 53.087 <sup>a</sup>   | C <sub>42</sub> H <sub>70</sub> O <sub>14</sub> | 797.4703       | 797.4693        | 1.25       | [M-H] <sup>-</sup>    | MS <sup>2</sup> [797.4705]: 635.4079(100), 473.3595(82.77)<br>MS <sup>3</sup> [797.4705→635.4080]: 473.3569(100)                                                                                                                                       | (B8-a)/A3-6-glc-20-glc                                                            | no. 20                               | [1] |
| 156              | 53.670 <sup>c</sup>   | C <sub>36</sub> H <sub>62</sub> O <sub>9</sub>  | 683.4410       | 683.4376        | 4.97       | [M+HCOO] <sup>-</sup> | MS <sup>2</sup> [683.4409]: 637.4280(100), 475.3742(73.51), 389.2277(4.27)                                                                                                                                                                             | PPT-glc                                                                           | no. 18                               | [1] |
| 157              | 53.702 <sup>a</sup>   | C <sub>53</sub> H <sub>90</sub> O <sub>22</sub> | 1077.5779      | 1077.5851       | -6.68      | [M-H] <sup>-</sup>    | MS <sup>2</sup> [1077.5776]: 945.5288(25.31), 915.5169(27.41), 783.4832(100), 621.4298(79.85), 459.3822(11.56)<br>MS <sup>3</sup> [1077.5776→783.4833]: 621.4388(100), 459.3886(18.20)<br>MS <sup>4</sup> [1077.5776→783.4833→621.4388]: 459.3886(100) | Isomer of ginsenoside Rc                                                          | no. 20                               | [1] |
| 158              | 53.862 <sup>a</sup>   | C <sub>48</sub> H <sub>82</sub> O <sub>17</sub> | 929.5423       | 929.5479        | -6.02      | [M-H] <sup>-</sup>    | MS <sup>2</sup> [929.5423]: 767.4948(60.29), 605.4325(100)                                                                                                                                                                                             | PPD-glc-glc-rha <sup>d</sup>                                                      | no. 20                               | [1] |
| 159              | 54.120 <sup>b</sup>   | C <sub>48</sub> H <sub>82</sub> O <sub>18</sub> | 991.5475       | 991.5483        | -0.81      | [M+HCOO] <sup>-</sup> | MS <sup>2</sup> [991.5477]: 945.5371(100)<br>MS <sup>3</sup> [991.5477→945.5369]: 783.4741(44.25), 459.3773(100)                                                                                                                                       | Ginsenoside Rd                                                                    | no. 18<br>no. 20<br>no. 19<br>no. 25 |     |
| 160              | 54.488 <sup>a</sup>   | C <sub>48</sub> H <sub>82</sub> O <sub>18</sub> | 945.5392       | 945.5428        | -3.81      | [M-H] <sup>-</sup>    | MS <sup>2</sup> [945.5392]: 783.4855(100), 621.4311(48.31), 459.3791(36.72)<br>MS <sup>3</sup> [945.5392→783.4857]: 621.4330(60.42), 459.3854(100), 375.2907(43.69)<br>MS <sup>4</sup> [945.5392→783.4857→621.4330]: 375.3074(100)                     | Isomer of ginsenoside Rd                                                          | no. 20                               | [1] |



| no.  | Retention Time      | Molecular Formula                               | Measured (m/z) | Predicted (m/z) | Diff (ppm) | Ion                   | ESI-MS <sup>n</sup> Data                                                                                                                                                                                                                  | Identification                                                                               | Sample                               | Ref |
|------|---------------------|-------------------------------------------------|----------------|-----------------|------------|-----------------------|-------------------------------------------------------------------------------------------------------------------------------------------------------------------------------------------------------------------------------------------|----------------------------------------------------------------------------------------------|--------------------------------------|-----|
| 161  | 55.133 <sup>c</sup> | C <sub>42</sub> H <sub>66</sub> O <sub>14</sub> | 793.4402       | 793.4380        | 2.77       | [M-H] <sup>-</sup>    | MS <sup>2</sup> [793.4402]: 631.3849(100), 455.3546(10.07)<br>MS <sup>3</sup> [793.4402→631.3849]: 455.3548(100)                                                                                                                          | OA-3-glc-28-glc                                                                              | no. 18                               | [1] |
| 162  | 55.617 <sup>a</sup> | C <sub>42</sub> H <sub>72</sub> O <sub>14</sub> | 845.4878       | 845.4904        | -3.08      | [M+HCOO] <sup>-</sup> | MS <sup>2</sup> [845.4877]: 799.4804(100)<br>MS <sup>3</sup> [845.4877→799.4805]: 637.4230(100)                                                                                                                                           | Isomer of ginsenoside Rg <sub>1</sub>                                                        | no. 20<br>no. 19                     | [1] |
| 163  | 55.777 <sup>a</sup> | C <sub>55</sub> H <sub>92</sub> O <sub>23</sub> | 1119.5922      | 1119.5957       | -3.13      | [M-H] <sup>-</sup>    | MS <sup>2</sup> [1119.5922]: 1077.5786(100), 1059.5667(72.08), 945.5346(12.22), 783.4875(9.73), 765.4759(9.56)<br>MS <sup>3</sup> [1119.5922→1077.5786]: 945.5334(80.77), 783.4894(100), 621.4307(87.40), 459.3825(39.61), 375.2964(7.99) | PPD-3-glc-glc-20-glc-xyl-AcO                                                                 | no. 20<br>no. 19                     | [1] |
| 164  | 56.507 <sup>a</sup> | C <sub>58</sub> H <sub>96</sub> O <sub>24</sub> | 587.3034       | 587.3073        | -6.64      | [M-2H] <sup>2-</sup>  | MS <sup>2</sup> [587.3036(2)]: 945.5321(100), 783.4888(72.22), 621.4450(7.77), 553.2942(82.27)<br>MS <sup>3</sup> [587.3036(2)→945.5317]: 783.4741(100)                                                                                   | Ginsenoside IV or its isomer                                                                 | no. 20<br>no. 19<br>no. 25           | [1] |
| 165  | 56.562 <sup>c</sup> | C <sub>47</sub> H <sub>74</sub> O <sub>18</sub> | 925.4817       | 925.4802        | 1.62       | [M-H] <sup>-</sup>    | MS <sup>2</sup> [925.4816]: 793.4427(100), 613.3709(10.56), 569.3851(22.63), 523.3783(52.83), 453.3377(9.71)<br>MS <sup>3</sup> [925.4816→793.4425]: 613.3835(100), 569.3747(84.62)                                                       | OA-gluA-glc-xyl <sup>†</sup>                                                                 | no. 18                               | [1] |
| 166  | 56.610 <sup>a</sup> | C <sub>41</sub> H <sub>66</sub> O <sub>13</sub> | 765.4454       | 765.4431        | 3.00       | [M-H] <sup>-</sup>    | MS <sup>2</sup> [765.4458]: 603.3934(26.34), 441.3342(100)                                                                                                                                                                                | Unknown(C <sub>29</sub> H <sub>46</sub> O <sub>3</sub> )-glc<br>(First found in ginseng)     | no. 20<br>no. 19                     |     |
| 167  | 56.767 <sup>b</sup> | C <sub>42</sub> H <sub>72</sub> O <sub>14</sub> | 845.4894       | 845.4904        | -1.18      | [M+HCOO] <sup>-</sup> | MS <sup>2</sup> [845.4892]: 799.4773(100)<br>MS <sup>3</sup> [845.4885→799.4772]: 475.3731(100)                                                                                                                                           | Isomer of ginsenoside Rg <sub>1</sub>                                                        | no. 19<br>no. 20                     | [1] |
| 168  | 56.835 <sup>a</sup> | C <sub>48</sub> H <sub>82</sub> O <sub>18</sub> | 945.5396       | 945.5428        | -3.38      | [M-H] <sup>-</sup>    | MS <sup>2</sup> [945.5397]: 783.4877(80.68), 621.4339(100), 459.3880(60.51)<br>MS <sup>3</sup> [945.5397→621.4340]: 460.4041(100)                                                                                                         | PPD-6-glc-glc-20-glc                                                                         | no. 20<br>no. 19<br>no. 25           | [1] |
| 169  | 57.313 <sup>a</sup> | C <sub>42</sub> H <sub>66</sub> O <sub>14</sub> | 793.4404       | 793.4380        | 3.02       | [M-H] <sup>-</sup>    | MS <sup>2</sup> [793.4404]: 631.3821(100), 455.3504(21.83)<br>MS <sup>3</sup> [793.4404→631.3819]: 455.3499(100)<br>MS <sup>4</sup> [793.4404→631.3819→633.3870]: 457.4015(100)                                                           | OA-2-gluA-28-glc                                                                             | no. 20<br>no. 19<br>no. 25           | [1] |
| 170  | 57.385 <sup>c</sup> | C <sub>51</sub> H <sub>84</sub> O <sub>21</sub> | 1031.5465      | 1031.5432       | 3.2        | [M-H] <sup>-</sup>    | MS <sup>2</sup> [1031.5465]: 988.5526(100), 987.5593(75.36)<br>MS <sup>3</sup> [987.5459]: 945.5400(100), 927.5312(31.32), 783.4934(15.37), 765.4750(11.51)<br>MS <sup>4</sup> [987.5459→945.5405]: 783.4947(100)                         | PPD-glc-glc-glc-mal <sup>‡</sup>                                                             | no. 18                               | [1] |
| 171  | 57.430 <sup>b</sup> | C <sub>48</sub> H <sub>76</sub> O <sub>19</sub> | 955.4861       | 955.4908        | -4.92      | [M-H] <sup>-</sup>    | MS <sup>2</sup> [955.4858]: 793.4378(100), 613.3683(34.71), 569.3837(41.66), 523.3772(66.57), 455.3529(10.11), 453.3321(12.25)<br>MS <sup>3</sup> [955.4858→793.4379]: 613.3738(100), 455.3581(87.44)                                     | Isomer of ginsenoside Ro                                                                     | no. 19<br>no. 20                     | [1] |
| 172* | 57.628 <sup>a</sup> | C <sub>42</sub> H <sub>70</sub> O <sub>13</sub> | 781.4719       | 781.4744        | -3.20      | [M-H] <sup>-</sup>    | MS <sup>2</sup> [781.4721]: 635.4131(100), 475.3577(51.43)                                                                                                                                                                                | Isomer of ginsenoside Rg <sub>1</sub>                                                        | no. 20                               | [1] |
| 173  | 57.777 <sup>c</sup> | C <sub>47</sub> H <sub>80</sub> O <sub>17</sub> | 915.5381       | 915.5323        | 6.34       | [M-H] <sup>-</sup>    | MS <sup>2</sup> [915.5378]: 753.4779(100), 621.4397(98.73), 603.4221(5.70), 459.3835(51.74), 375.2984(6.65)<br>MS <sup>3</sup> [915.5378→753.4779]: 621.4420(100), 373.2729(40.08)                                                        | PPD-glc-glc-xyl                                                                              | no. 18<br>no. 20<br>no. 19<br>no. 25 | [1] |
| 174* | 57.887 <sup>a</sup> | C <sub>41</sub> H <sub>66</sub> O <sub>13</sub> | 765.4440       | 765.4431        | 1.18       | [M-H] <sup>-</sup>    | MS <sup>2</sup> [765.4440]: 603.3800(59.04), 441.3398(100)                                                                                                                                                                                | Unknown(C <sub>29</sub> H <sub>46</sub> O <sub>3</sub> )-glc-glc<br>(First found in ginseng) | no. 20<br>no. 19                     |     |
| 175  | 57.967 <sup>b</sup> | C <sub>47</sub> H <sub>80</sub> O <sub>17</sub> | 961.4347       | 961.5378        | -3.22      | [M+HCOO] <sup>-</sup> | MS <sup>2</sup> [961.5345]: 915.5190(100)<br>MS <sup>3</sup> [961.5345→915.5190]: 753.4780(100), 621.4687(50.36), 459.3804(62.71)                                                                                                         | PPD-glc-glc-xyl                                                                              | no. 19<br>no. 20<br>no. 25           | [1] |
| 176  | 58.115 <sup>a</sup> | C <sub>53</sub> H <sub>90</sub> O <sub>22</sub> | 1077.5791      | 1077.5851       | -5.57      | [M-H] <sup>-</sup>    | MS <sup>2</sup> [1077.5791]: 945.5344(29.36), 915.5249(21.95), 783.4918(54.65), 621.4333(100), 459.3844(27.06)                                                                                                                            | Isomer of ginsenoside Rc                                                                     | no. 20                               | [1] |

| no.              | Retention Time      | Molecular Formula                               | Measured (m/z) | Predicted (m/z) | Diff (ppm) | Ion                      | ESI-MS <sup>n</sup> Data                                                                                                                                                                                                                            | Identification                                                        | Sample                               | Ref                |
|------------------|---------------------|-------------------------------------------------|----------------|-----------------|------------|--------------------------|-----------------------------------------------------------------------------------------------------------------------------------------------------------------------------------------------------------------------------------------------------|-----------------------------------------------------------------------|--------------------------------------|--------------------|
|                  |                     |                                                 |                |                 |            |                          | MS <sup>3</sup> [1077.5791→621.4333]: 459.3886(100), 374.2697(100)                                                                                                                                                                                  |                                                                       |                                      |                    |
| 177              | 58.373 <sup>b</sup> | C <sub>57</sub> H <sub>94</sub> O <sub>23</sub> | 618.3041       | 618.3075        | -5.50      | [M+HCOO-H] <sup>2-</sup> | MS <sup>2</sup> [595.3010(2)]: 1145.6196(37.56), 1077.5837(100)<br>MS <sup>3</sup> [595.3010(2)→1145.6191]: 1077.5565(100), 1059.5664(36.56), 459.3886(36.56)                                                                                       | PPD-glc-xyl-glc-glc-but <sup>‡</sup>                                  | no. 19<br>no. 20<br>no. 18           | [1]                |
| 178              | 58.602 <sup>a</sup> | C <sub>48</sub> H <sub>82</sub> O <sub>18</sub> | 945.5639       | 945.5428        | -6.24      | [M-H] <sup>-</sup>       | MS <sup>2</sup> [945.5366]: 783.4861(100), 621.4294(56.04), 459.3821(20.52)                                                                                                                                                                         | Isomer of Ginsenoside Rd                                              | no. 18<br>no. 20<br>no. 19           | [1]                |
| 179              | 58.708 <sup>c</sup> | C <sub>50</sub> H <sub>78</sub> O <sub>20</sub> | 997.4961       | 997.5014        | -5.31      | [M-H] <sup>-</sup>       | MS <sup>2</sup> [997.4958]: 835.4599(6.75), 793.4380(100), 731.4357(9.55), 613.3750(30.88), 569.3865(68.78), 523.3828(93.92), 455.3531(18.19)                                                                                                       | OA-gluA-glc-glc-AcO <sup>‡</sup>                                      | no. 18                               | [1]                |
| 180 <sup>*</sup> | 59.250 <sup>d</sup> | C <sub>48</sub> H <sub>74</sub> O <sub>20</sub> | 1015.5035      | 1015.4755       | 27.57      | [M+HCOO] <sup>-</sup>    | MS <sup>2</sup> [1015.5033]: 969.4981(58.46), 807.4443(100), 795.4479(7.14)<br>MS <sup>3</sup> [1015.5033→807.4439]: 455.3513(100)                                                                                                                  | OA-gluA-gluA-glc <sup>‡</sup><br>(First found in ginseng)             | no. 18<br>no. 20<br>no. 19<br>no. 25 |                    |
| 181 <sup>*</sup> | 59.155 <sup>a</sup> | C <sub>36</sub> H <sub>60</sub> O <sub>9</sub>  | 681.4189       | 681.4219        | -4.4       | [M+HCOO] <sup>-</sup>    | MS <sup>2</sup> [681.4187]: 635.4126(100), 473.3630(99.79)<br>MS <sup>3</sup> [681.4187→635.4126]: 473.3592(100), 389.2573(14.61)                                                                                                                   | Ginsenoside Rh <sub>7</sub> or its isomer<br>(First found in ginseng) | no. 20<br>no. 19                     |                    |
| 182              | 59.157 <sup>c</sup> | C <sub>47</sub> H <sub>80</sub> O <sub>17</sub> | 961.5405       | 961.5378        | 2.81       | [M+HCOO] <sup>-</sup>    | MS <sup>2</sup> [961.5407]: 915.5312(100)<br>MS <sup>3</sup> [961.5407→915.5309]: 783.4910(100), 621.4302(63.72), 459.3772(27.26)                                                                                                                   | PPD-3-glc-xyl-20-glc                                                  | no. 18<br>no. 20<br>no. 19<br>no. 25 | [1]                |
| 183              | 59.375 <sup>a</sup> | C <sub>50</sub> H <sub>84</sub> O <sub>19</sub> | 987.5471       | 987.5534        | -6.38      | [M-H] <sup>-</sup>       | MS <sup>2</sup> [987.5471]: 945.5318(100), 927.5255(23.90), 783.4851(28.51), 621.4324(10.64)<br>MS <sup>3</sup> [987.5471→945.5316]: 783.4866(100), 621.4312(39.74), 459.3859(16.47)<br>MS <sup>4</sup> [987.5471→945.5316→783.4869]: 459.3806(100) | Quinquenoside III or its isomer                                       | no. 20<br>no. 19<br>no. 25           | [1]                |
| 184              | 60.030 <sup>b</sup> | C <sub>36</sub> H <sub>62</sub> O <sub>9</sub>  | 683.4381       | 683.4376        | 0.73       | [M+HCOO] <sup>-</sup>    | MS <sup>2</sup> [683.4383]: 637.4259(100), 537.3386(4.21), 475.3783(8.47)<br>MS <sup>3</sup> [683.4383→637.4257]: 537.3410(10.97), 475.3783(100), 387.3258(16.50)                                                                                   | Ginsenoside F <sub>1</sub> or its isomer                              | no. 18<br>no. 20<br>no. 19           |                    |
| 185 <sup>*</sup> | 60.048 <sup>a</sup> | C <sub>42</sub> H <sub>70</sub> O <sub>13</sub> | 781.4727       | 781.4744        | -2.18      | [M-H] <sup>-</sup>       | MS <sup>2</sup> [781.4730]: 619.4193(100), 457.3731(20.87)                                                                                                                                                                                          | (A2-a)/(B7-b)/B9-glc-glc<br>(First found in ginseng)                  | no. 20<br>no. 19                     | [1] <sup>Q,N</sup> |
| 186              | 60.257 <sup>c</sup> | C <sub>51</sub> H <sub>86</sub> O <sub>21</sub> | 987.5473       | 987.5534        | -6.18      | [M-H] <sup>-</sup>       | MS <sup>2</sup> [987.5474]: 945.5359(100), 783.4869(33.49), 927.5241(23.70), 765.4764(11.31), 621.4334(10.23), 459.3835(4.18)<br>MS <sup>3</sup> [987.5474→945.5355]: 784.4897(100), 783.4837(97.61), 621.4306(94.23), 459.3842(47.60)              | Isomer of pseudo-ginsenoside Re <sub>1</sub>                          | no. 18<br>no. 19                     | [1]                |
| 187              | 60.795 <sup>c</sup> | C <sub>48</sub> H <sub>82</sub> O <sub>17</sub> | 929.5480       | 929.5479        | 3.28       | [M-H] <sup>-</sup>       | MS <sup>2</sup> [929.5480]: 783.4949(91.23), 621.4327(100), 459.3805(46.57), 375.2880(7.35)<br>MS <sup>3</sup> [929.5480→621.4327]: 459.3840(100)                                                                                                   | PPD-3-glc-20-glc-rha                                                  | no. 18<br>no. 20<br>no. 25           | [1]                |
| 188              | 61.135 <sup>a</sup> | C <sub>42</sub> H <sub>70</sub> O <sub>12</sub> | 765.4805       | 765.4795        | 1.31       | [M-H] <sup>-</sup>       | MS <sup>2</sup> [765.9879]: 619.4194(100), 601.4092(51.03), 457.3683(20.59)                                                                                                                                                                         | (B7-b)/(A2-a)-glc-rha                                                 | no. 20<br>no. 19<br>no. 18<br>no. 25 | [1]                |

| no.              | Retention Time        | Molecular Formula                               | Measured (m/z) | Predicted (m/z) | Diff (ppm) | Ion                   | ESI-MS <sup>a</sup> Data                                                                                                                                                              | Identification                                                 | Sample                               | Ref                |
|------------------|-----------------------|-------------------------------------------------|----------------|-----------------|------------|-----------------------|---------------------------------------------------------------------------------------------------------------------------------------------------------------------------------------|----------------------------------------------------------------|--------------------------------------|--------------------|
| 189              | 61.228 <sup>b</sup>   | C <sub>42</sub> H <sub>72</sub> O <sub>13</sub> | 829.4925       | 829.4955        | -3.62      | [M+HCOO] <sup>-</sup> | MS <sup>2</sup> [829.4925]: 783.4878(69.33), 621.4319(100), 459.3801(18.76)<br>MS <sup>3</sup> [829.4925→621.4318]: 537.3498(11.46), 459.3872(100), 375.2872(13.79)                   | Ginsenoside F <sub>2</sub> or its isomer                       | no. 18<br>no. 20<br>no. 19<br>no. 25 | [1]                |
| 190              | 61.490 <sup>a</sup>   | C <sub>42</sub> H <sub>70</sub> O <sub>12</sub> | 765.4789       | 765.4795        | -0.78      | [M-H] <sup>-</sup>    | MS <sup>2</sup> [765.7203]: 619.4183(100), 621.4192(23.14), 601.4095(42.05), 457.3687(30.35)                                                                                          | (B7-b)/(A2-a)-glc-rha                                          | no. 20<br>no. 19<br>no. 18           | [1]                |
| 191              | 61.680 <sup>a</sup>   | C <sub>52</sub> H <sub>86</sub> O <sub>19</sub> | 1013.5581      | 1013.5691       | -10.85     | [M-H] <sup>-</sup>    | MS <sup>2</sup> [1013.5582]: 945.5358(100), 783.4784(13.01), 621.4308(1.05)<br>MS <sup>3</sup> [1013.5582→945.5356]: 783.4861(100), 622.4212(54.53), 621.4332(36.23), 459.3828(63.59) | PPD-glc-glc-glc-but <sup>†</sup>                               | no. 20<br>no. 25                     | [1]                |
| 192 <sup>*</sup> | 61.837 <sup>a</sup>   | C <sub>42</sub> H <sub>70</sub> O <sub>13</sub> | 781.4763       | 781.4744        | 2.43       | [M-H] <sup>-</sup>    | MS <sup>2</sup> [781.4765]: 619.4236(100), 457.3813(13.98)                                                                                                                            | (B7-b)/(A2-a)-glc-glc <sup>c</sup><br>(First found in ginseng) | no. 20                               | [1] <sup>Q,N</sup> |
| 193              | 62.745 <sup>a</sup>   | C <sub>42</sub> H <sub>72</sub> O <sub>13</sub> | 783.4896       | 783.4900        | -0.51      | [M-H] <sup>-</sup>    | MS <sup>2</sup> [783.4896]: 621.4308(89.65), 537.3368(17.85), 459.3811(100), 375.2873(46.39)<br>MS <sup>3</sup> [783.4896→621.4309]: 537.3410(100)                                    | Gypenoside LXXV or its isomer                                  | no. 18<br>no. 20<br>no. 25           | [1]                |
| 194              | 63.315 <sup>b</sup>   | C <sub>42</sub> H <sub>66</sub> O <sub>14</sub> | 793.4410       | 793.4380        | 3.78       | [M-H] <sup>-</sup>    | MS <sup>2</sup> [793.4409]: 613.3699(100), 455.3511(49.33), 453.3356(84.76)<br>MS <sup>3</sup> [793.4409→613.3701]: 455.3581(100)                                                     | OA-3-gluA-glc                                                  | no. 18<br>no. 19                     | [1]                |
| 195              | 63.885 <sup>a</sup>   | C <sub>41</sub> H <sub>70</sub> O <sub>12</sub> | 799.4837       | 799.4849        | -1.50      | [M+HCOO] <sup>-</sup> | MS <sup>2</sup> [799.4836]: 753.4742(100), 621.4320(53.65), 459.3886(15.12)                                                                                                           | Compound Y or its isomer                                       | no. 20<br>no. 19                     |                    |
| 196 <sup>*</sup> | 65.975 <sup>c,*</sup> | C <sub>36</sub> H <sub>58</sub> O <sub>8</sub>  | 663.4145       | 663.4114        | 4.67       | [M+HCOO] <sup>-</sup> | MS <sup>2</sup> [663.4144]: 617.4003(15.34), 455.3504(100)                                                                                                                            | OA-glc<br>(First found in ginseng)                             | no. 18                               |                    |
| 197              | 66.682 <sup>a</sup>   | C <sub>36</sub> H <sub>62</sub> O <sub>8</sub>  | 667.4412       | 667.4427        | -2.25      | [M+HCOO] <sup>-</sup> | MS <sup>2</sup> [667.4413]: 621.4311(100), 459.3821(47.18)<br>MS <sup>3</sup> [667.4413→621.4313]: 459.3886(100)                                                                      | PPD-glc                                                        | no. 20<br>no. 19                     | [1]                |
| 198 <sup>*</sup> | 66.723 <sup>a</sup>   | C <sub>36</sub> H <sub>56</sub> O <sub>9</sub>  | 632.3900       | 632.3924        | -3.96      | [M-H] <sup>-</sup>    | MS <sup>2</sup> [631.3826]: 455.3527(100)                                                                                                                                             | OA-gluA<br>(First found in ginseng)                            | no. 20                               |                    |
| 199              | 67.482 <sup>a</sup>   | C <sub>36</sub> H <sub>62</sub> O <sub>8</sub>  | 667.4396       | 667.4427        | -4.64      | [M+HCOO] <sup>-</sup> | MS <sup>2</sup> [667.4398]: 621.4339(100), 459.3804(16.92)<br>MS <sup>3</sup> [667.4398→621.4340]: 537.3410(100), 460.3939(100)                                                       | PPD-glc                                                        | no. 20<br>no. 19                     | [1]                |

glc, glucosyl; gluA, glucuronic acid moiety; rha, rhamnosyl; xyl, xylosyl; AcO, acetyl; mal, malonyl; but, butenoyl; pro, propiolyl.

<sup>a</sup> Retention time extracted from the chromatogram of wild ginseng (no. 20);

<sup>b</sup> Retention time extracted from the chromatogram of wild ginseng (no. 19);

<sup>c</sup> Retention time extracted from the chromatogram of ginseng under forest (no. 18);

<sup>d</sup> Retention time extracted from the chromatogram of cultivated ginseng (no. 25);

<sup>N</sup> Compound has already been detected from *Panax notoginseng*;

<sup>O</sup> Compound has already been detected from Shenshao Tablet;

<sup>Q</sup> Compound has already been detected from *Panax quinquefolium*;

<sup>R</sup> Compound has already been detected from Korea red ginseng;

<sup>S</sup> Compound has already been detected from steamed ginseng;

<sup>\*</sup> Saponins were identified from *Panax ginseng* for the first time;

<sup>\*\*</sup> Potential new compounds;

<sup>†</sup> Orders and/or locations of sugar residues and/or substituted groups could not be predicted.

Reference:

1. Yang, W.Z., Ye, M., Qiao, X., Liu, C.F., Miao, W.J., Bo, T., Tao, H.Y., Guo, D.A. A strategy for efficient discovery of new natural compounds by integrating orthogonal column chromatography and liquid chromatography/mass spectrometry analysis: Its application in *Panax ginseng*, *Panax quinquefolium* and *Panax notoginseng* to characterize 437 potential new ginsenosides. *Anal Chim Acta*. **2012**, 739, 56-66.
2. Tung, N.H., Song, G.Y., Minh, C.V., Kiem, P.V., Jin, L.G., Boo, H.J., Kang, H.K., Kim, Y.H. Steamed ginseng-leaf components enhance cytotoxic effects on human leukemia HL-60 cells. *Chem Pharm Bull*. **2010**, 58, 1111-1115.
3. Park, J.D., Lee, Y.H., Kim, S.I. Ginsenoside Rf<sub>2</sub>, a new dammarane glycoside from korean red ginseng (*Panax ginseng*). *Arch Pharm Res*. **1998**, 21, 615-617.
4. Miao, W.J., Hu, Y., Jia, L., Zhang, C.X., Yang, W.Z., Zhang, P., Guo, D.A. Profiling and identification of chemical components of Shenshao Tablet and its absorbed components in rats by comprehensive HPLC/DAD/ESI-MS<sup>n</sup> analysis. *Chinese Journal of Natural Medicines*. **2018**, 16, 791-800.

**Table S2. Saponins detected from “all the four ginseng samples” and “both the two wild ginseng samples” by HPLC-IT-TOF-MS<sup>a</sup>**

| <b>21 saponins detected from all the four ginseng samples</b><br>(including 4 rhamnosides and 8 xylosides) | <b>50 saponins detected from both the two wild ginseng samples</b><br>(including 17 rhamnosides and 11 xylosides) |                                                                                   |
|------------------------------------------------------------------------------------------------------------|-------------------------------------------------------------------------------------------------------------------|-----------------------------------------------------------------------------------|
| 1. (B1-b)/(B2-a)                                                                                           | 1. (C3-b)-6-glc-20-glc-rha <sup>△</sup>                                                                           | 26. Ginsenoside Rg <sub>31</sub> or its isomer <sup>△</sup>                       |
| 2. Ginsenoside Re <sub>5</sub> or its isomer                                                               | 2. (B2-b)-20-glc <sup>△</sup>                                                                                     | 27. (B8-b)-rha-xy <sup>1*</sup> , #                                               |
| 3. Ginsenoside Re <sub>4</sub> or its isomer                                                               | 3. (C1-b)/(C3-b)/(B10)-6-glc-C <sub>6</sub> H <sub>5</sub> O <sub>5</sub> -20-rha <sup>#</sup>                    | 28. PPT-6-glc-xy <sup>1</sup> -20-glc-glc                                         |
| 4. Notoginsenoside R <sub>1</sub>                                                                          | 4. (B2-b)-glc-xy <sup>1</sup> <sup>△</sup>                                                                        | 29. (B4-a)-6-glc-xy <sup>1</sup> -20-glc-glc                                      |
| 5. Ginsenoside Rg <sub>1</sub>                                                                             | 5. Quinquenoside L <sub>9</sub> or its isomer                                                                     | 30. (B8-b)-glc <sup>△</sup>                                                       |
| 6. Ginsenoside Re                                                                                          | 6. Ginsenoside SL <sub>1</sub> or its isomer                                                                      | 31. (C2)/(C3-a)-glc                                                               |
| 7. PPT-glc-xy <sup>1</sup>                                                                                 | 7. Vinaginsenoside R <sub>12</sub> or its isomer <sup>△</sup>                                                     | 32. Unknown(C <sub>27</sub> H <sub>48</sub> O <sub>4</sub> )-glc-glc <sup>#</sup> |
| 8. Notoginsenoside R <sub>4</sub> or its isomer                                                            | 8. B6/(B3-b)/(B4-b)-glc-glc-glc                                                                                   | 33. Isomer of notoginsenoside R <sub>1</sub>                                      |
| 9. Ginsenoside Rf                                                                                          | 9. (B2-b)-glc-xy <sup>1</sup> (isomer of no. 4) <sup>△</sup>                                                      | 34. PPT-rha-glc-rha                                                               |
| 10. Ginsenoside Rb <sub>1</sub>                                                                            | 10. (B2-b)-glc (isomer of no. 2) <sup>△</sup>                                                                     | 35. A3-glc-glc                                                                    |
| 11. Ginsenoside F <sub>3</sub> , Notoginsenoside R <sub>2</sub> , or their isomer                          | 11. Unknown(C <sub>29</sub> H <sub>48</sub> O <sub>4</sub> )-glc-glc-glc <sup>△</sup>                             | 36. Unknown(C <sub>26</sub> H <sub>44</sub> O <sub>5</sub> )-glc-rha <sup>#</sup> |
| 12. Ginsenoside Rc or its isomer                                                                           | 12. B6/(B3-b)-glc <sup>△</sup>                                                                                    | 37. (B4-b)-3-glc-20-rha                                                           |
| 13. Ginsenoside Rh <sub>1</sub>                                                                            | 13. Ginsenoside Re <sub>8</sub> or its isomer                                                                     | 38. (B3-b)/B6-glc <sup>△</sup>                                                    |
| 14. Ginsenoside Rg <sub>2</sub>                                                                            | 14. (B3-b)/(B4-b)-6-glc-glc                                                                                       | 39. Ginsenoside Ra <sub>1</sub> /Ra <sub>2</sub> or its isomer                    |
| 15. Ginsenoside Rb <sub>2</sub>                                                                            | 15. (B4-b)/B4-glc                                                                                                 | 40. Ginsenoside F <sub>1</sub>                                                    |
| 16. Ginsenoside Rd                                                                                         | 16. (B3-b)-glc-rha                                                                                                | 41. Isomer of ginsenoside Rg <sub>1</sub>                                         |
| 17. PPD-glc-glc-xy <sup>1</sup>                                                                            | 17. 25-hydroxy ginsenoside Rg <sub>2</sub> or its isomer                                                          | 42. Unknown(C <sub>29</sub> H <sub>46</sub> O <sub>3</sub> )-glc <sup>△</sup>     |
| 18. OA-gluA-gluA-glc                                                                                       | 18. B6-glc-rha <sup>△</sup>                                                                                       | 43. Isomer of ginsenoside Rg <sub>1</sub>                                         |
| 19. PPD-3-glc-xy <sup>1</sup> -20-glc (isomer of no. 17)                                                   | 19. Unknown(C <sub>31</sub> H <sub>52</sub> O <sub>7</sub> )-glc-rha <sup>#</sup>                                 | 44. Isomer of ginsenoside Ro                                                      |
| 20. (B7-b)/(A2-a)-glc-rha                                                                                  | 20. (B4-b)/(B6)-glc <sup>△</sup>                                                                                  | 45. Unknown(C <sub>29</sub> H <sub>46</sub> O <sub>3</sub> )-glc-glc <sup>△</sup> |
| 21. Ginsenoside F <sub>2</sub> or its isomer                                                               | 21. Floralginsenoside N or its isomer <sup>*</sup>                                                                | 46. Ginsenoside Rh <sub>7</sub> or its isomer <sup>△</sup>                        |
|                                                                                                            | 22. A3-glc-glc-rha                                                                                                | 47. (A2-a)/(B7-b)/B9-glc-glc <sup>△</sup>                                         |
|                                                                                                            | 23. (B3-b)/(B4-b)/B6/C2-glc-xy <sup>1</sup>                                                                       | 48. Compound Y or its isomer                                                      |
|                                                                                                            | 24. Isomer of ginsenoside Re                                                                                      | 49. PPD-glc                                                                       |
|                                                                                                            | 25. (B4-b)/(B6)-glc (isomer of no. 20) <sup>△</sup>                                                               | 50. PPD-glc (isomer of no. 48)                                                    |

<sup>\*</sup>, saponins were both rhamnosides and xylosides; <sup>#</sup>, potential new compounds; <sup>△</sup>, first found in ginseng.

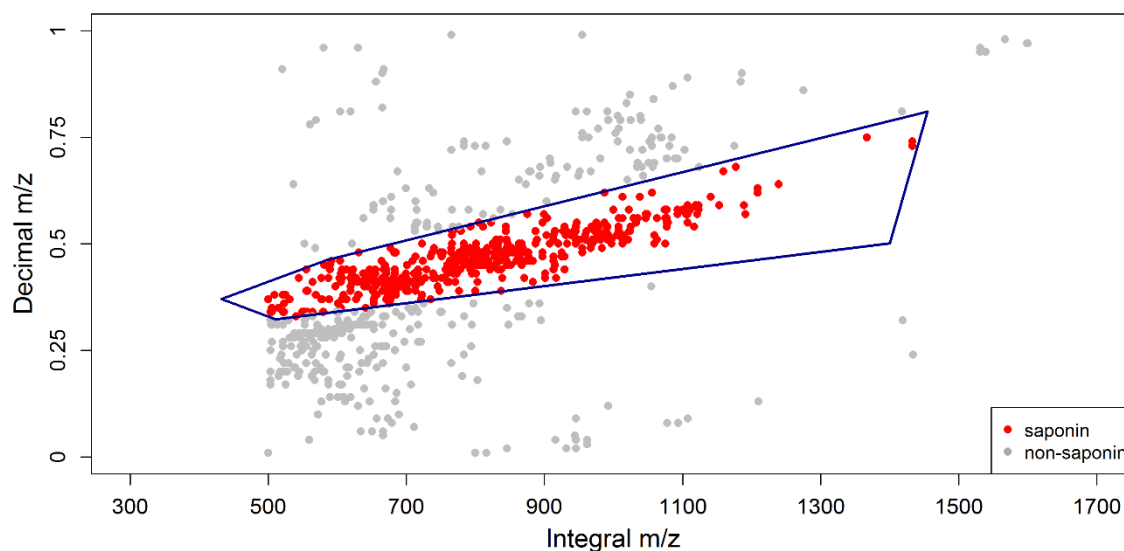

**Figure S20.** Potential saponin precursors (red spots) extracted by “5-point screening” method with the 5 points (x, y) of estimated lowest  $m/z$  (441, 0.3783), estimated highest mass defection (503, 0.3378), estimated lowest  $m/z$  with the lowest mass defection (591, 0.4630), estimated highest  $m/z$  with the highest mass defection (1421, 0.5505), and estimated highest  $m/z$  with the lowest mass defection (1467, 0.8150), in which x represented the integral part of  $m/z$ , and y represents the decimal part of  $m/z$ .

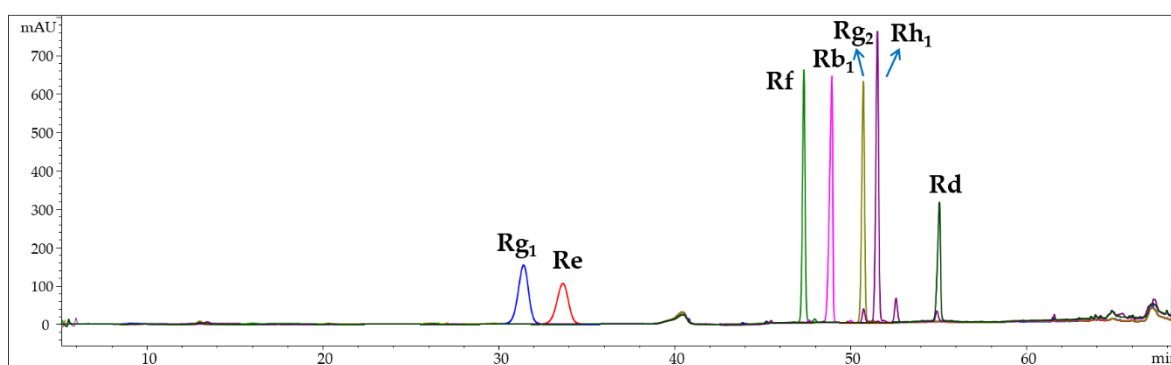

**Figure S21.** Overlapped chromatograms of reference substances of ginsenosides Rg<sub>1</sub>, Re, Rf, Rb<sub>1</sub>, Rg<sub>2</sub>, Rh<sub>1</sub>, and Rd.

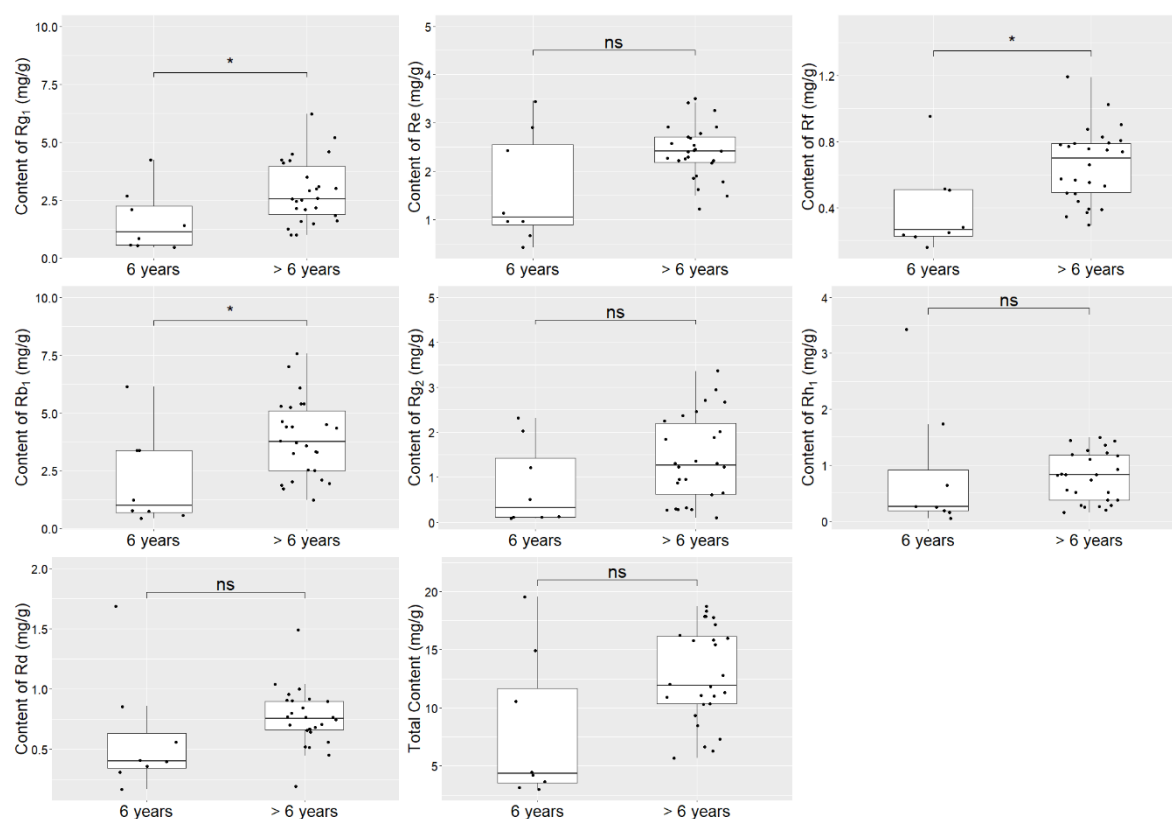

**Figure S22.** Comparison of the contents of seven ginsenosides and their total content between ginseng under forest with ages older than 6 years (n = 26), and ginseng under forest, cultivated ginseng with age of 6 years (n = 8; \*  $p < 0.05$ ; ns, no significance).

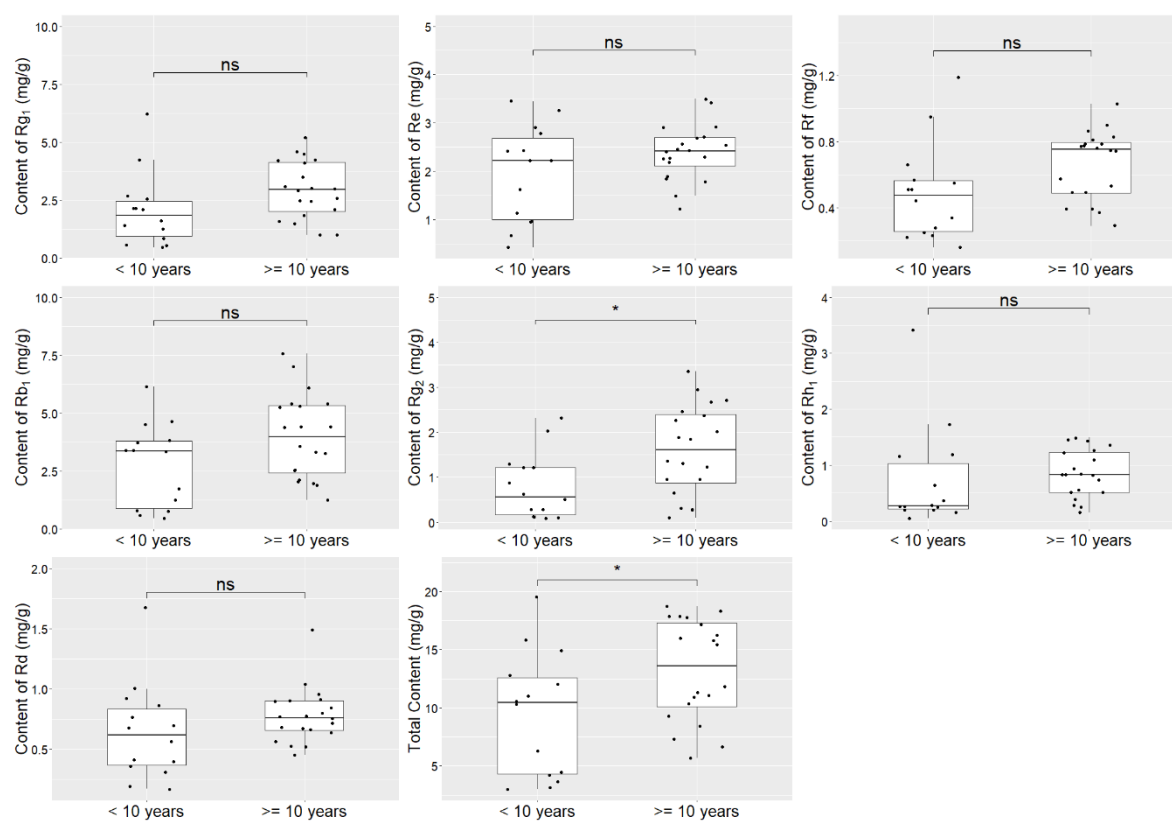

**Figure S23.** Comparison of the contents of seven ginsenosides and their total content between ginseng under forest with ages older than 10 years (n = 20), and ginseng under forest, cultivated ginseng with age younger than 10 years (n = 14; ns, no significance).

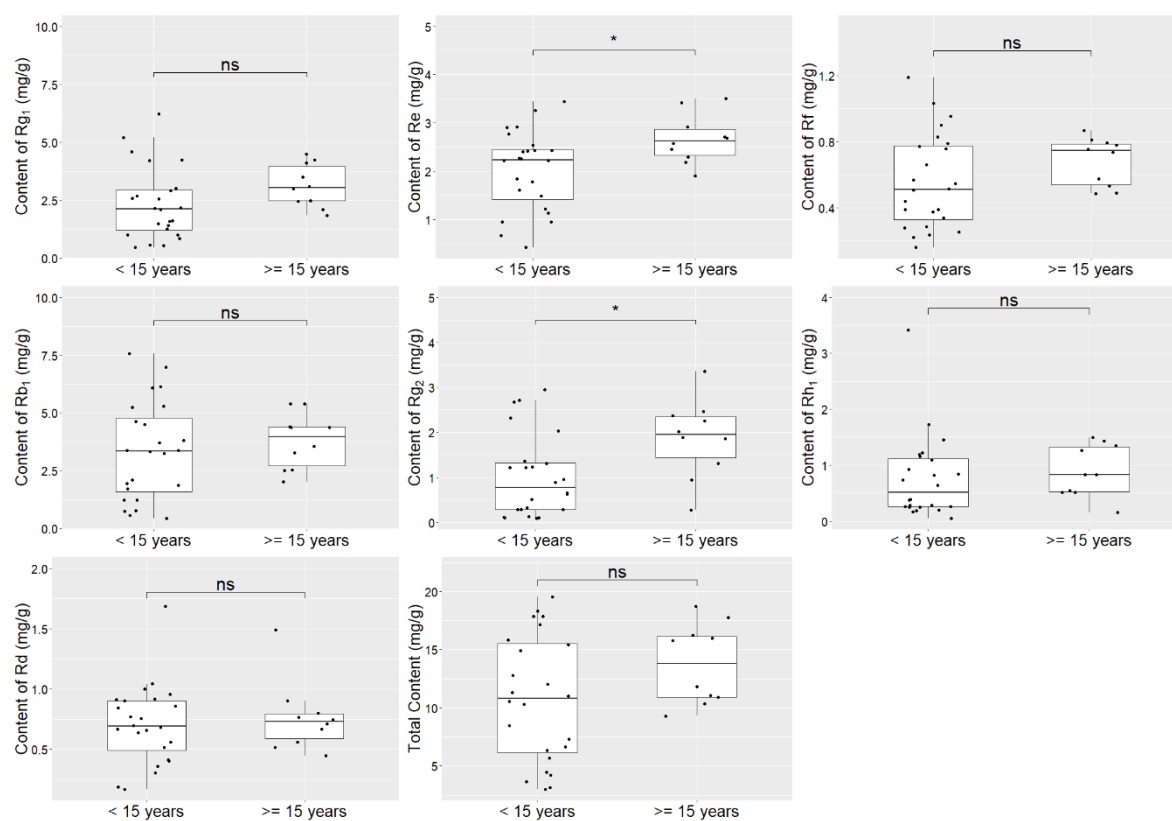

**Figure S24.** Comparison of the contents of seven ginsenosides and their total content between ginseng under forest with ages older than 15 years (n = 10), and ginseng under forest, cultivated ginseng with age younger than 15 years (n = 24; \*\*  $p < 0.01$ ; ns, no significance).



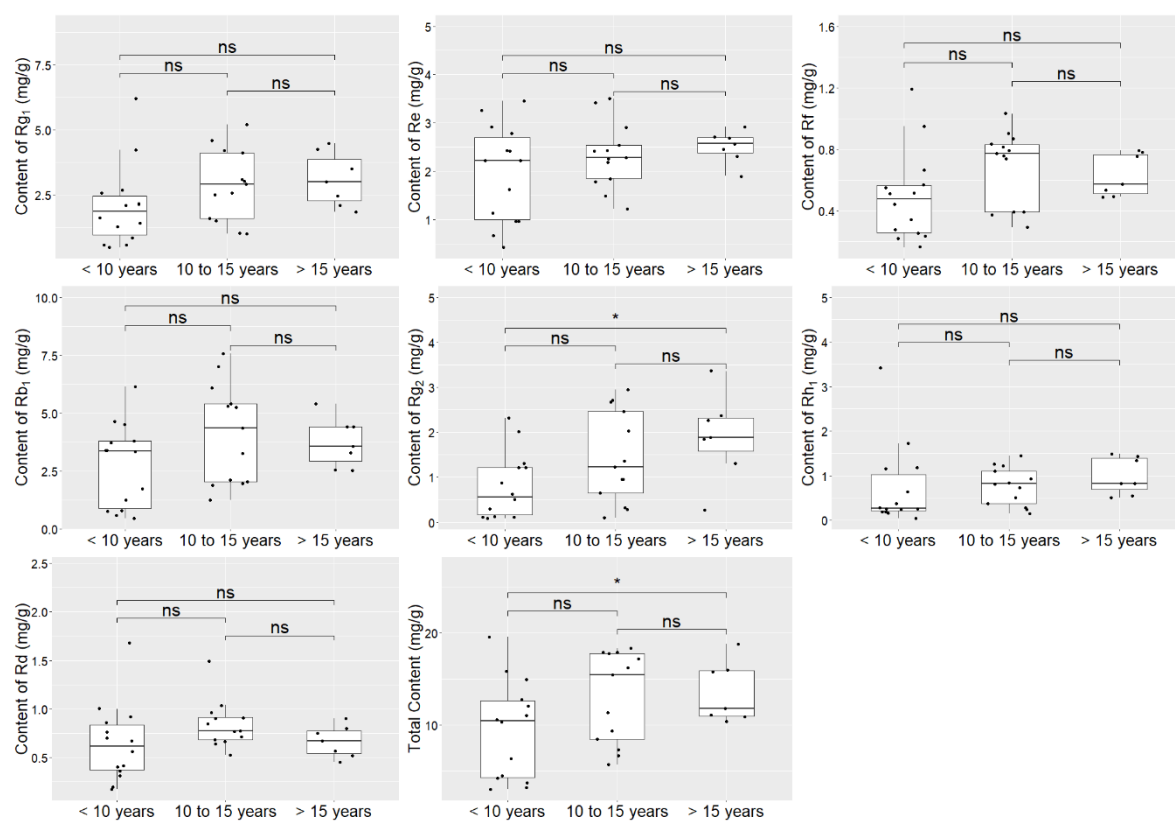

**Figure S25.** Comparison of the contents of seven ginsenosides and their total content between ginseng under forest with ages older than 15 years (n = 7), between 10 to 15 years (n = 13) and ginseng under forest, cultivated ginseng with age younger than 10 years (n = 14; \*  $p < 0.01$ ; ns, no significance).

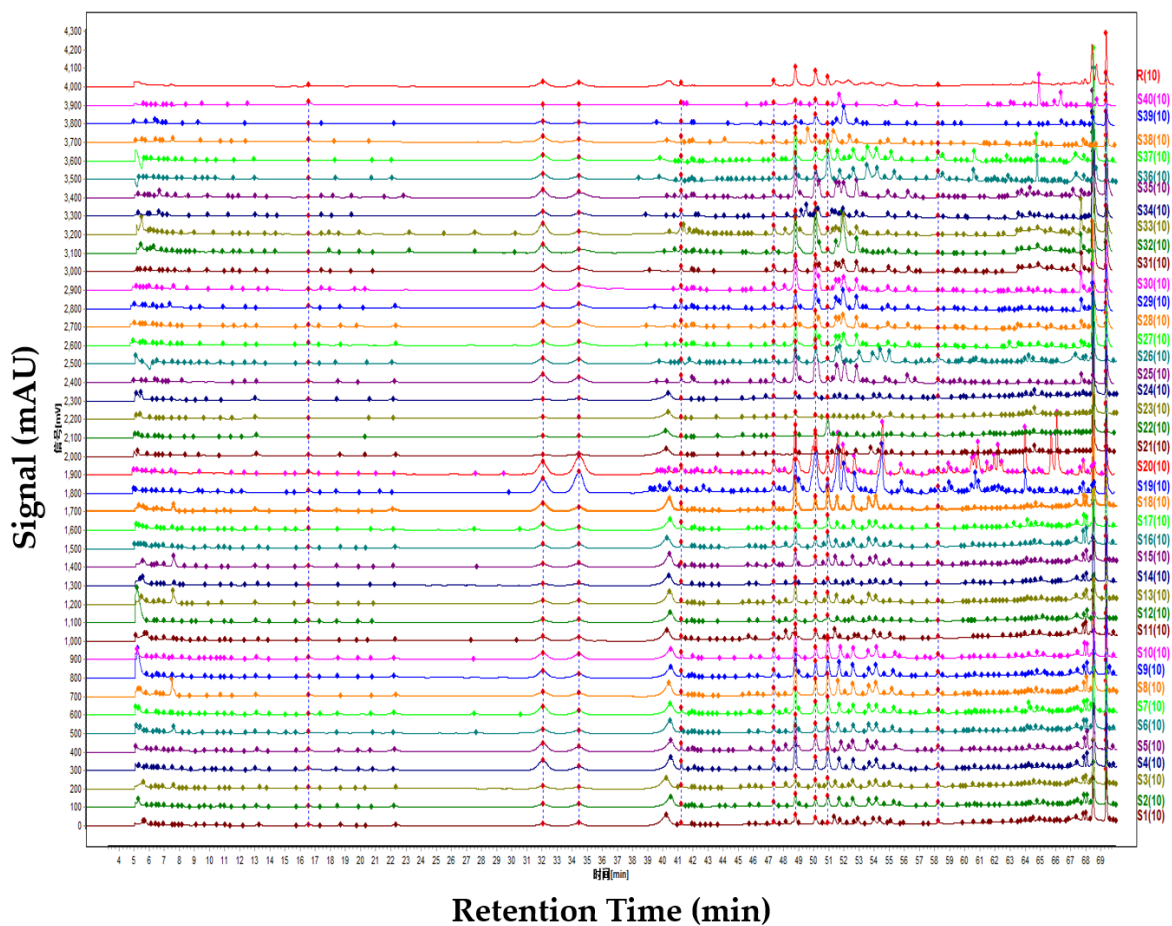

**Figure S26.** Chromatographic fingerprints obtained by HPLC-DAD of 40 ginseng samples with retention time correction by 10 common peaks using Similarity Evaluation System for Chromatographic Fingerprint of TCM version 2012 (S1–S40: ginseng samples nos. 1–40; R: reference fingerprint automatically generated by software)

**Table S3. Peak areas (manually integrated) of the five peaks within the characteristic peak pattern and the ratio of signal-to-noise**

| Sample no.           | Count of Peaks <sup>a</sup> | Noise (mAU) | Peak Area/mAU*s (S/N <sup>b</sup> Ratio) |              |                |               |                |
|----------------------|-----------------------------|-------------|------------------------------------------|--------------|----------------|---------------|----------------|
|                      |                             |             | Peak 1                                   | Peak 2       | Peak 3         | Peak 4        | Peak 5         |
| Ginseng under forest |                             |             |                                          |              |                |               |                |
| 1                    | 4                           | 0.09278     | 7.36 (3.5)                               | 23.59 (14.0) | 108.90 (60.7)  | 39.55 (13.3)  | 64.43 (25.0)   |
| 2                    | 4                           | 0.06339     |                                          | 29.81 (24.3) | 132.32 (95.2)  | 35.03 (20.9)  | 67.13 (37.5)   |
| 3                    | 4                           | 0.09313     | 5.50 (3.4)                               | 23.78 (13.7) | 137.37 (67.9)  | 52.44 (17.3)  | 86.40 (33.0)   |
| 4                    | 4                           | 0.06900     | 6.09 (4.1)                               | 43.45 (33.7) | 235.36 (152.4) | 45.96 (26.6)  | 172.58 (92.1)  |
| 5                    | 4                           | 0.1017      | 7.37 (4.1)                               | 54.45 (26.5) | 210.75 (100.8) | 52.16 (16.9)  | 188.34 (65.8)  |
| 6                    | 5                           | 0.05127     | 15.32 (14.2)                             | 24.11 (22.3) | 141.60 (114.9) | 22.19 (18.1)  | 85.91 (61.2)   |
| 7                    | 4                           | 0.08162     | 19.25 (12.3)                             | 16.65 (9.0)  | 93.57 (51.2)   | 46.42 (22.9)  | 161.36 (73.8)  |
| 8                    | 3                           | 0.07752     |                                          | 17.48 (8.4)  | 180.73 (71.9)  | 24.53 (12.9)  | 115.27 (46.5)  |
| 9                    | 4                           | 0.1396      | 5.33 (2.2)                               | 50.98 (17.7) | 202.54 (66.9)  | 47.54 (12.7)  | 153.71 (39.7)  |
| 10                   | 5                           | 0.04883     | 12.15 (11.7)                             | 31.65 (31.8) | 197.74 (188.4) | 35.79 (25.9)  | 140.42 (102.4) |
| 11                   | 4                           | 0.08879     | 10.82 (5.9)                              | 21.14 (12.8) | 164.79 (89.8)  | 44.73 (14.9)  | 95.10 (37.8)   |
| 12                   | 4                           | 0.06145     |                                          | 39.39 (35.7) | 180.33 (143.3) | 49.40 (31.1)  | 44.30 (30.7)   |
| 13                   | 4                           | 0.05048     |                                          | 93.08 (63.4) | 261.62 (175.3) | 44.65 (35.2)  | 42.55 (24.8)   |
| 14                   | 4                           | 0.04109     |                                          | 26.97 (33.2) | 106.17 (120.0) | 26.24 (22.6)  | 48.48 (37.5)   |
| 15                   | 5                           | 0.06113     | 14.57 (11.8)                             | 35.17 (21.9) | 151.84 (93.4)  | 22.86 (15.5)  | 82.05 (43.4)   |
| 16                   | 4                           | 0.1012      | 8.21 (4.1)                               | 37.01 (19.8) | 174.42 (84.7)  | 61.70 (20.2)  | 123.99 (44.0)  |
| 17                   | 4                           | 0.1066      | 36.24 (18.8)                             | 17.06 (8.2)  | 138.56 (59.3)  | 31.68 (11.3)  | 88.86 (32.9)   |
| 18                   | 4                           | 0.1026      | 10.10 (3.8)                              | 41.26 (18.2) | 187.00 (79.3)  | 36.41 (14.3)  | 180.16 (59.6)  |
| 27                   | 4                           | 0.1473      | 14.55 (5.2)                              | 37.56 (10.2) | 223.55 (73.9)  | 61.65 (15.8)  | 141.25 (35.2)  |
| 28                   | 4                           | 0.1546      | 16.65 (5.8)                              | 38.43 (10.2) | 209.74 (67.5)  | 68.88 (16.7)  | 170.69 (39.6)  |
| 29                   | 3                           | 0.1725      | 19.40 (4.8)                              | 33.79 (7.2)  | 226.33 (60.3)  | 109.29 (17.6) | 165.17 (32.4)  |
| 30                   | 4                           | 0.1753      |                                          | 52.76 (13.6) | 286.23 (70.6)  | 101.30 (20.2) | 155.20 (30.5)  |
| 31                   | 4                           | 0.1066      | 7.34 (2.7)                               | 26.67 (12.5) | 126.69 (54.6)  | 46.16 (14.8)  | 90.69 (28.9)   |
| 32                   | 4                           | 0.1039      | 45.19 (22.2)                             | 12.33 (4.8)  | 211.31 (96.0)  | 92.47 (28.8)  | 191.21 (64.5)  |
| 33                   | 5                           | 0.1373      | 106.61 (37.7)                            | 49.34 (14.1) | 129.04 (44.8)  | 62.81 (14.7)  | 224.11 (58.7)  |
| 34                   | 3                           | 0.1536      |                                          | 31.81 (9.8)  | 130.13 (39.3)  | 102.35 (23.4) | 126.36 (29.7)  |
| 35                   | 3                           | 0.1337      | 6.39 (2.8)                               | 26.49 (9.2)  | 209.29 (71.7)  | 203.76 (52.8) | 190.61 (50.6)  |
| Wild ginseng         |                             |             |                                          |              |                |               |                |
| 19                   | 5                           | 0.1336      | 22.31 (11.3)                             | 39.60 (14.3) | 249.43 (84.0)  | 75.79 (21.4)  | 132.78 (37.0)  |
| 20                   | 5                           | 0.1198      | 34.56 (17.3)                             | 54.32 (20.7) | 298.45 (104.3) | 84.70 (26.0)  | 80.89 (27.2)   |
| Cultivated ginseng   |                             |             |                                          |              |                |               |                |
| 21                   | 2                           | 0.05706     |                                          |              | 44.70 (32.8)   | 11.28 (7.4)   | 37.84 (22.4)   |
| 22                   | 0                           | 0.1065      |                                          | 8.19 (3.5)   | 20.92 (9.2)    |               |                |
| 23                   | 1                           | 0.03883     |                                          |              | 42.76 (49.1)   |               |                |
| 24                   | 2                           | 0.07222     |                                          | 7.21 (4.7)   | 53.89 (33.0)   | 12.63 (6.8)   | 22.03 (11.0)   |
| 25                   | 1                           | 0.1691      |                                          | 14.72 (4.3)  | 128.79 (32.7)  | 13.95 (4.2)   | 11.03 (3.4)    |
| 26                   | 3                           | 0.08311     |                                          | 15.10 (9.8)  | 119.14 (66.7)  | 27.26 (14.4)  | 55.86 (26.6)   |
| 36                   | 3                           | 0.04377     | 5.09 (6.2)                               | 11.14 (11.3) | 58.66 (64.8)   | 5.89 (6.6)    | 61.46 (49.3)   |
| 37                   | 2                           | 0.2194      |                                          | 13.25 (2.7)  | 65.06 (14.1)   | 10.32 (2.1)   | 62.50 (10.3)   |
| 38                   | 1                           | 0.07459     |                                          |              | 330.71 (219.9) | 6.50 (5.4)    |                |
| 39                   | 3                           | 0.06371     |                                          | 6.85 (6.6)   | 298.93 (229.0) | 17.26 (13.1)  | 67.44 (40.9)   |
| 40                   | 2                           | 0.1715      |                                          | 7.24 (1.7)   | 57.72 (14.3)   | 56.17 (10.3)  | 35.49 (7.5)    |

<sup>a</sup> Number of peaks with S/N over 10.

<sup>b</sup> S/N: signal-to-noise.
